# Supplementary material
Source: PubMed Central journal article supplement (PMC4128473)

# Synthesis and Evaluation of *N*<sup>6</sup>-Substituted Apioadenosines as Potential Adenosine A<sub>3</sub> Receptor Modulators

Kiran S. Toti,<sup>a</sup> Steven M. Moss,<sup>b</sup> Silvia Paoletta,<sup>b</sup> Zhan-Guo Gao,<sup>b</sup> Kenneth A. Jacobson,<sup>b</sup> and Serge Van Calenbergh<sup>a,\*</sup>

<sup>a</sup> *Laboratory for Medicinal Chemistry, Faculty of Pharmaceutical Sciences, Ghent University  
Harelbekestraat 72, B-9000 Gent, Belgium.*

<sup>b</sup> *Molecular Recognition Section, Laboratory of Bioorganic Chemistry, National Institute of Diabetes and Digestive and Kidney Diseases, National Institutes of Health, Bethesda, Maryland 20892, USA.*

Corresponding author. Tel.: +32 9 264 81 24; fax: +32 9 264 81 46.  
E-mail address: serge.vancalenbergh@ugent.be (Prof. S. Van Calenbergh).

<sup>1</sup>H and <sup>13</sup>C NMR Spectra of compound **10-31** are appended bellow.

|                                                                       |       |          |
|-----------------------------------------------------------------------|-------|----------|
| <sup>1</sup> H and <sup>13</sup> C NMR Spectra of compound <b>10a</b> | ..... | SI 3-4   |
| <sup>1</sup> H and <sup>13</sup> C NMR Spectra of compound <b>10b</b> | ..... | SI 5-6   |
| <sup>1</sup> H and <sup>13</sup> C NMR Spectra of compound <b>10c</b> | ..... | SI 7-8   |
| <sup>1</sup> H and <sup>13</sup> C NMR Spectra of compound <b>11a</b> | ..... | SI 9-10  |
| <sup>1</sup> H and <sup>13</sup> C NMR Spectra of compound <b>11b</b> | ..... | SI 11-12 |
| <sup>1</sup> H and <sup>13</sup> C NMR Spectra of compound <b>11c</b> | ..... | SI 13-14 |
| <sup>1</sup> H and <sup>13</sup> C NMR Spectra of compound <b>12</b>  | ..... | SI 15-16 |
| <sup>1</sup> H and <sup>13</sup> C NMR Spectra of compound <b>13</b>  | ..... | SI 17-18 |
| <sup>1</sup> H and <sup>13</sup> C NMR Spectra of compound <b>14</b>  | ..... | SI 19-20 |
| <sup>1</sup> H and <sup>13</sup> C NMR Spectra of compound <b>15</b>  | ..... | SI 21-22 |
| <sup>1</sup> H and <sup>13</sup> C NMR Spectra of compound <b>16</b>  | ..... | SI 23-24 |
| <sup>1</sup> H Spectra of compound <b>17</b>                          | ..... | SI 25    |
| <sup>1</sup> H and <sup>13</sup> C NMR Spectra of compound <b>18</b>  | ..... | SI 26-27 |
| <sup>1</sup> H and <sup>13</sup> C NMR Spectra of compound <b>19</b>  | ..... | SI 28-29 |

|                                                                      |       |          |
|----------------------------------------------------------------------|-------|----------|
| <sup>1</sup> H Spectra of compound <b>20+21</b>                      | ..... | SI 30    |
| <sup>1</sup> H and <sup>13</sup> C NMR Spectra of compound <b>22</b> | ..... | SI 31-32 |
| <sup>1</sup> H and <sup>13</sup> C NMR Spectra of compound <b>23</b> | ..... | SI 33-34 |
| <sup>1</sup> H and <sup>13</sup> C NMR Spectra of compound <b>24</b> | ..... | SI 35-36 |
| <sup>1</sup> H and <sup>13</sup> C NMR Spectra of compound <b>25</b> | ..... | SI 37-38 |
| <sup>1</sup> H and <sup>13</sup> C NMR Spectra of compound <b>26</b> | ..... | SI 39-40 |
| <sup>1</sup> H Spectra of compound <b>27</b>                         | ..... | SI 41    |
| <sup>1</sup> H and <sup>13</sup> C NMR Spectra of compound <b>28</b> | ..... | SI 42-43 |
| <sup>1</sup> H and <sup>13</sup> C NMR Spectra of compound <b>29</b> | ..... | SI 44-45 |
| <sup>1</sup> H and <sup>13</sup> C NMR Spectra of compound <b>30</b> | ..... | SI 46-47 |
| <sup>1</sup> H and <sup>13</sup> C NMR Spectra of compound <b>31</b> | ..... | SI 48-49 |

H NMR: Compound 10a

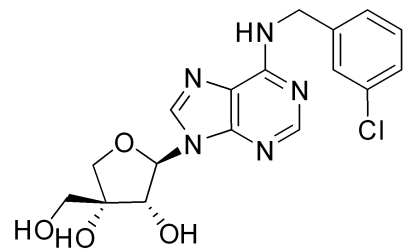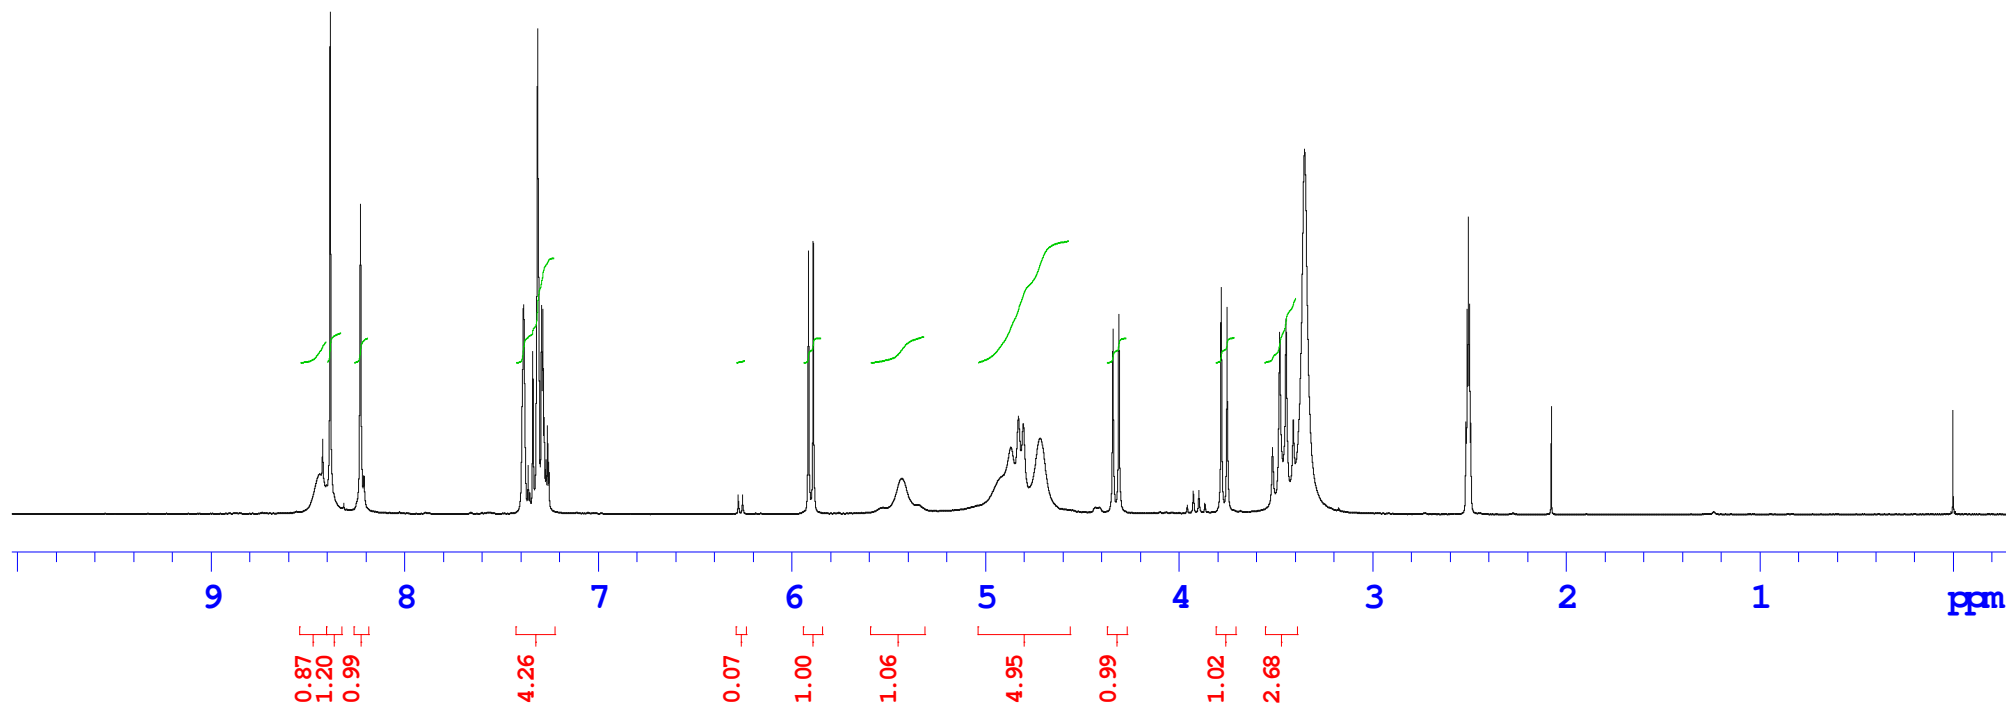

C NMR: Compound 10a

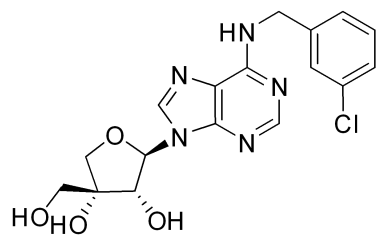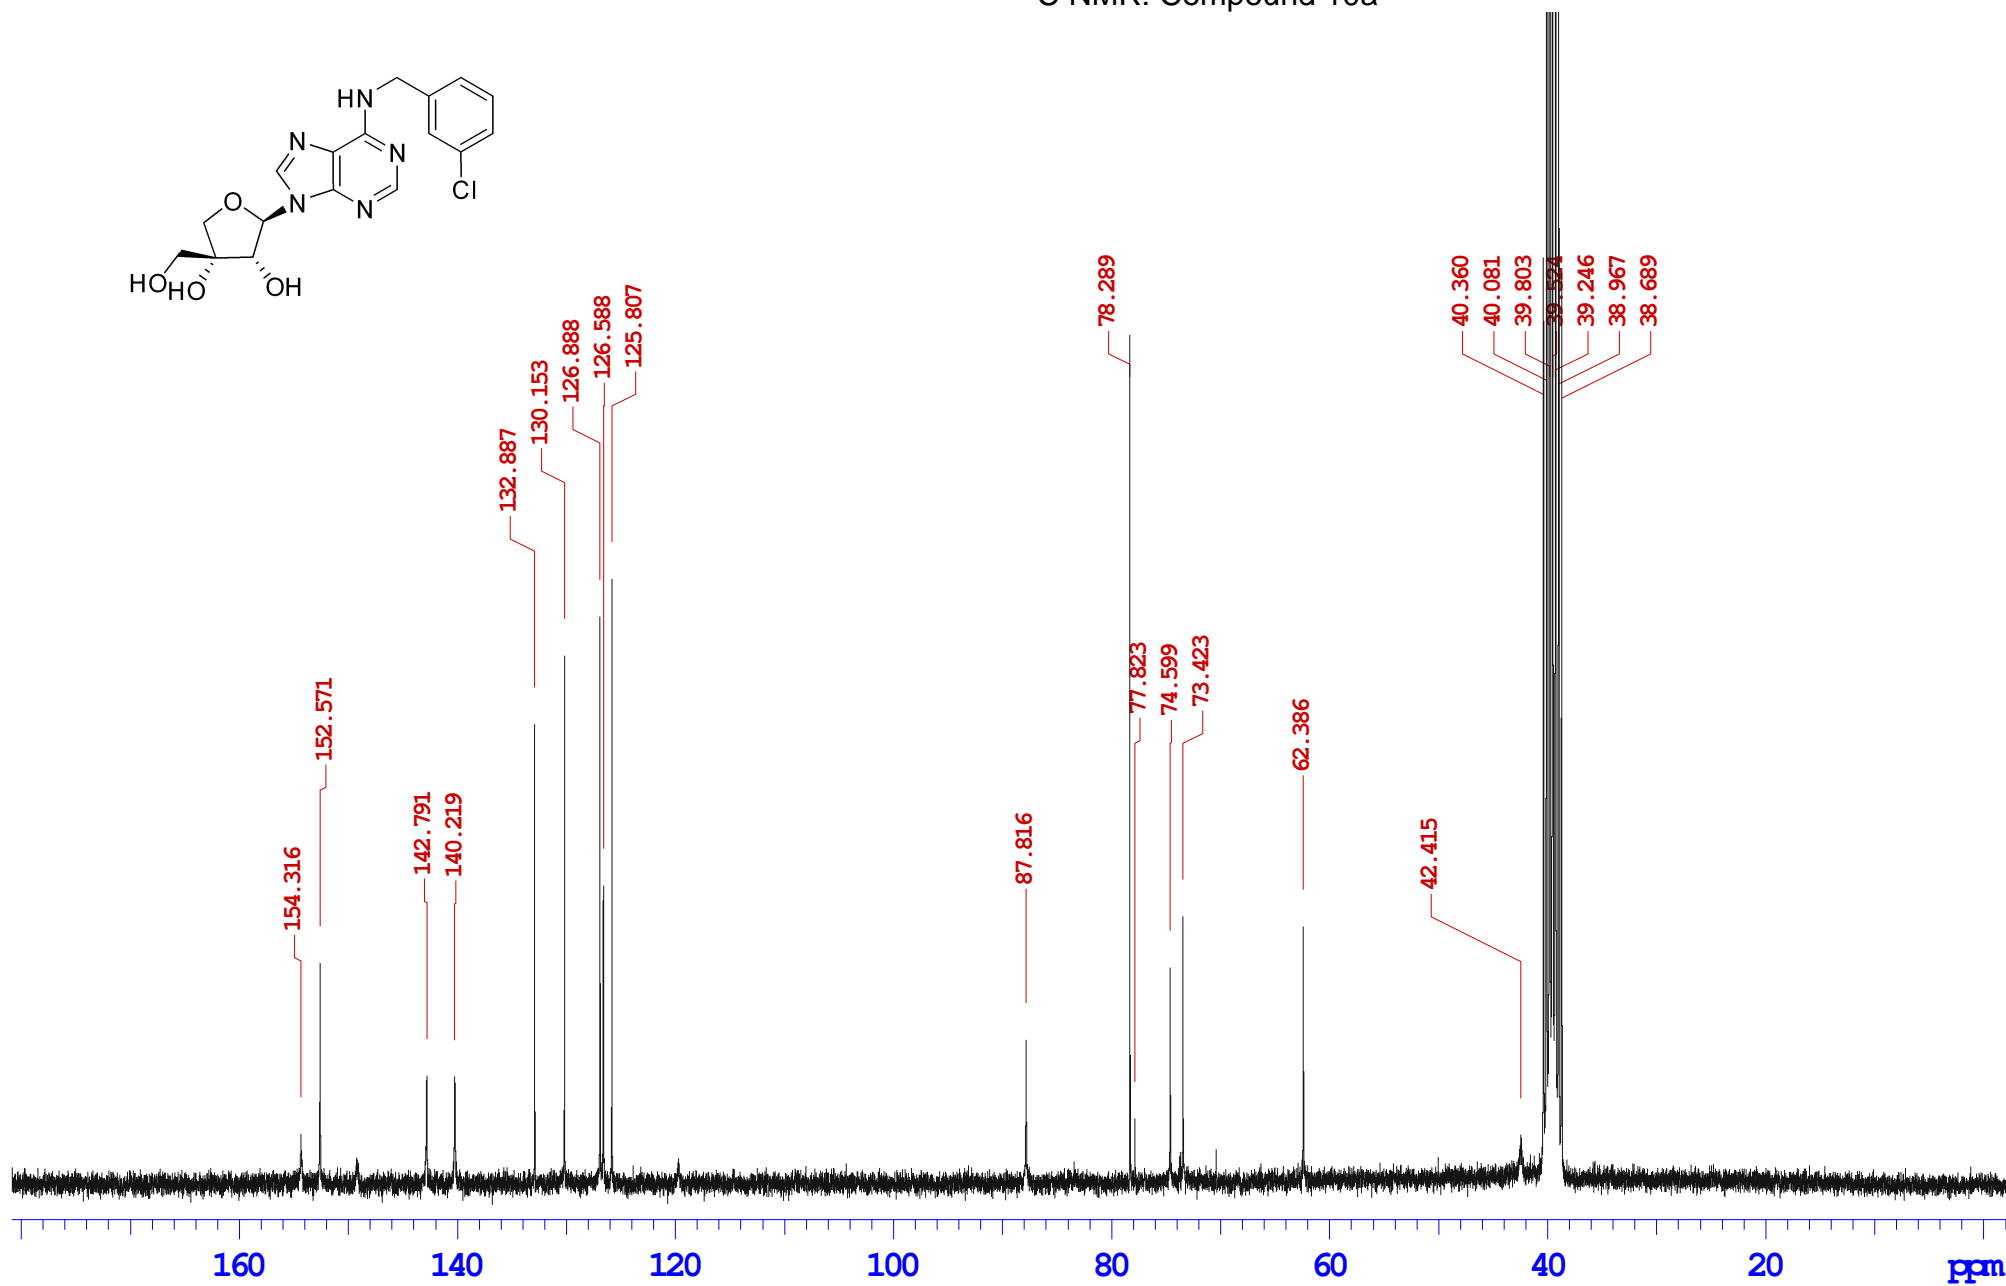

H NMR: Compound 10b

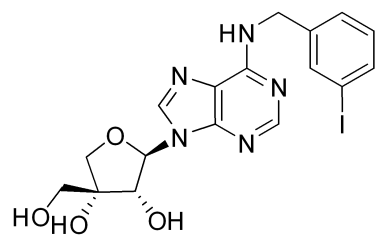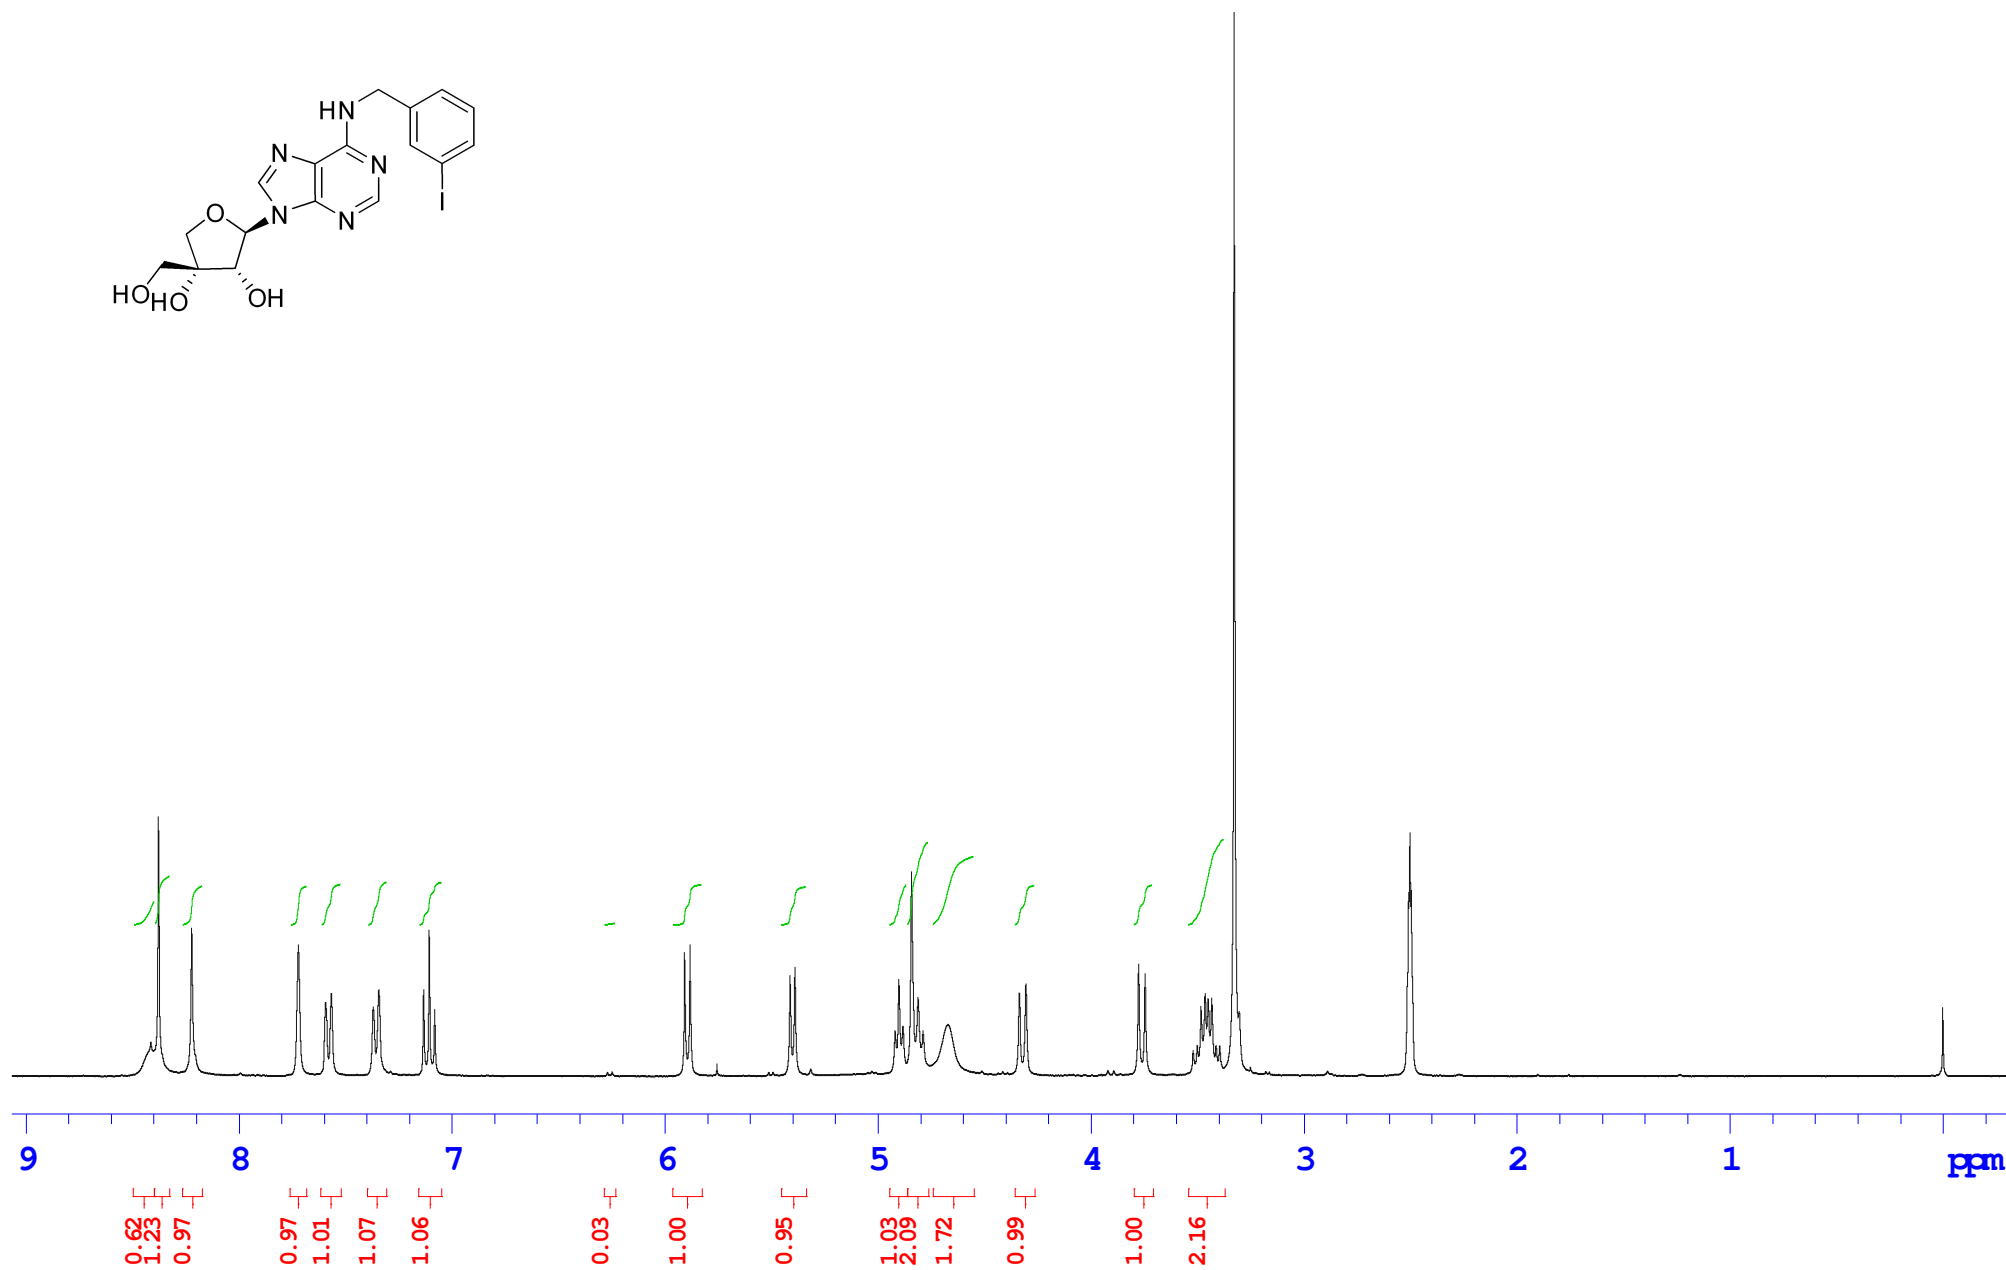

C NMR: Compound 10b

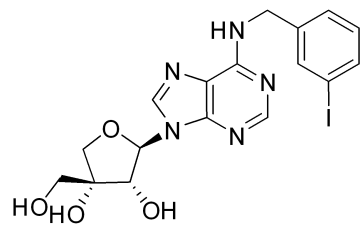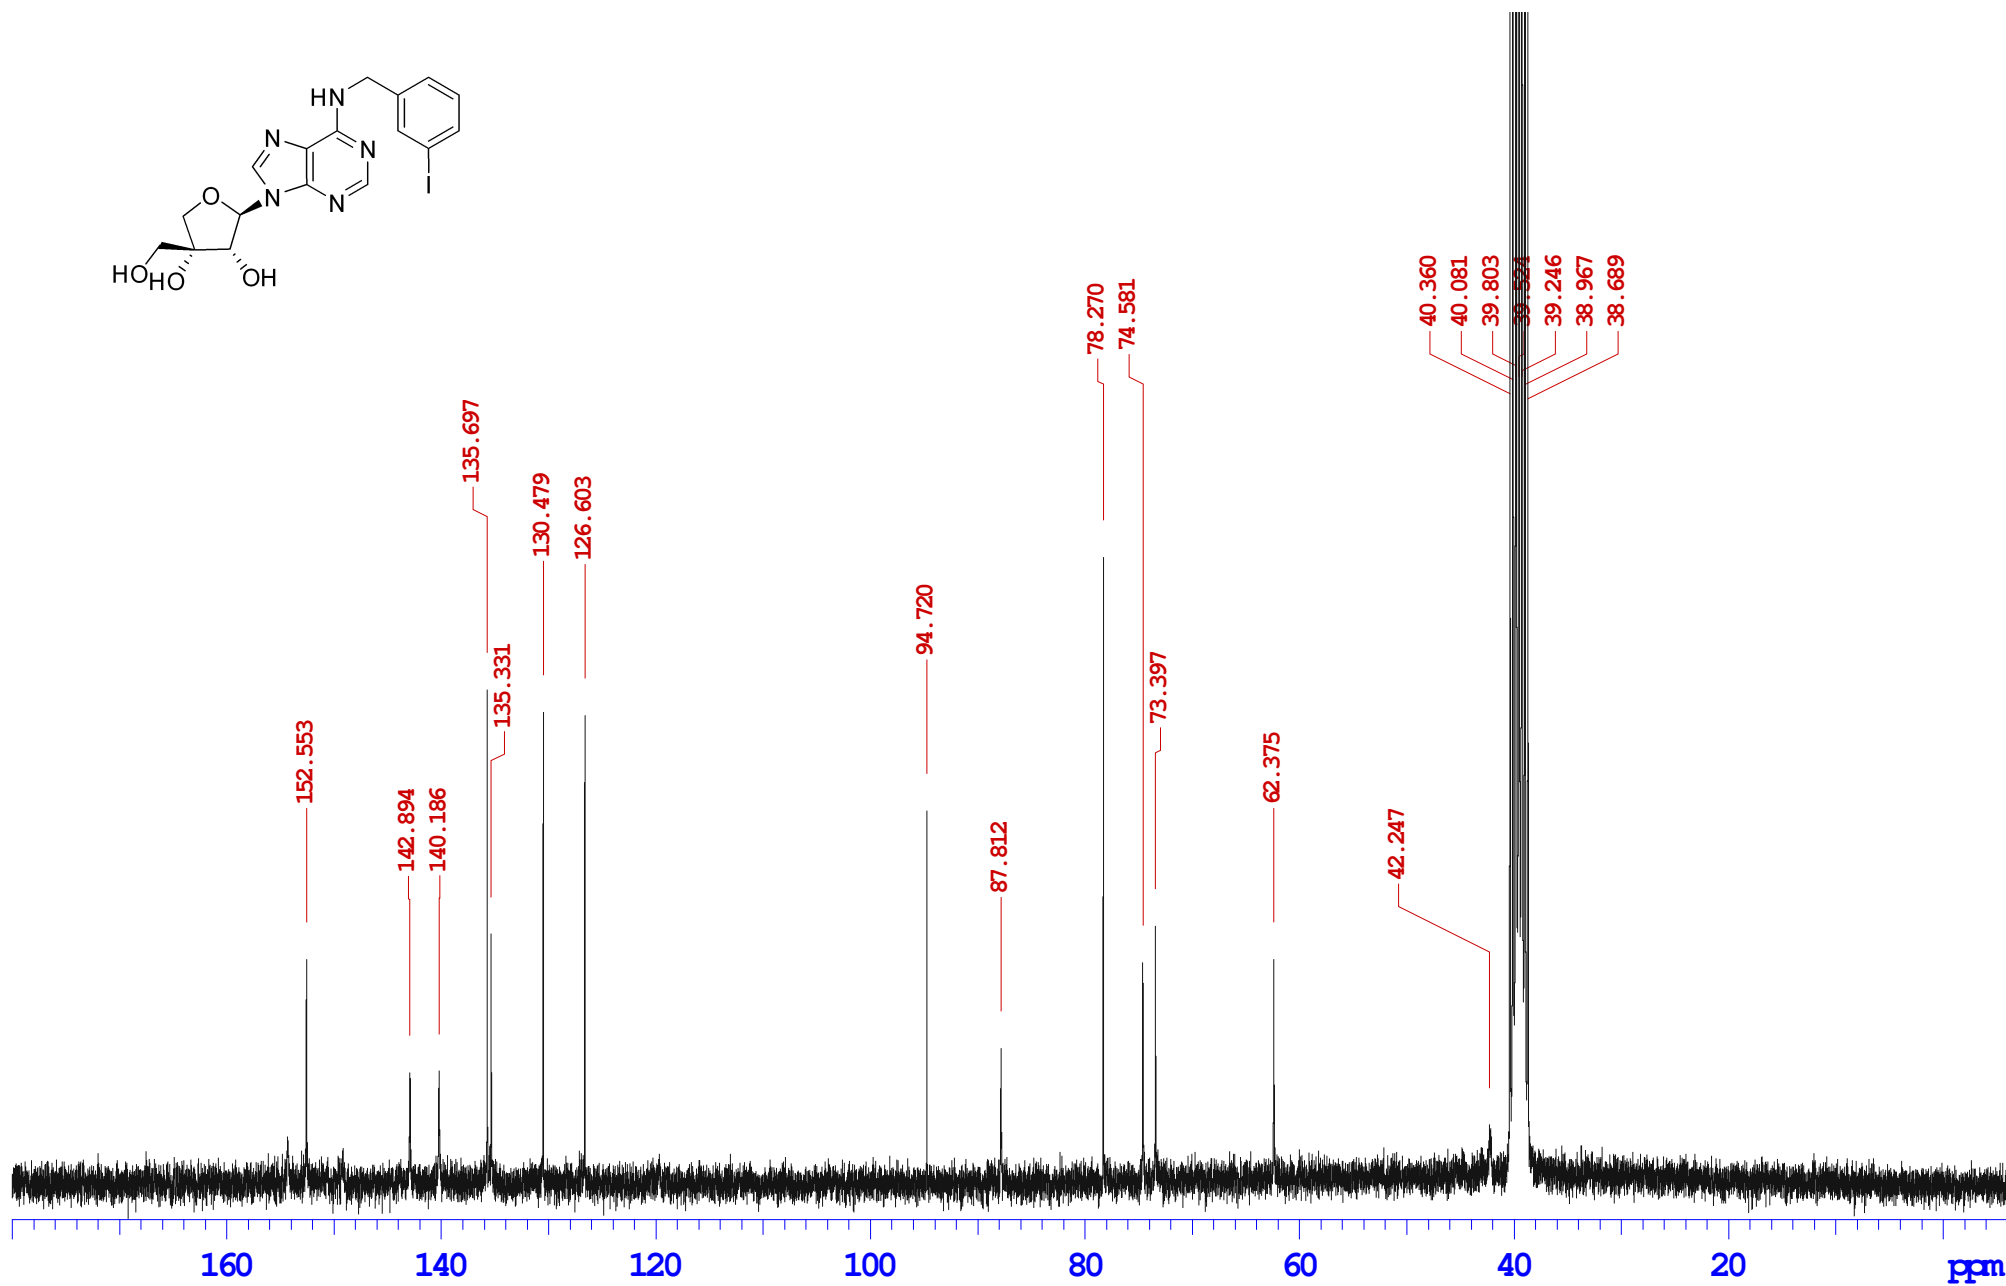

H NMR: Compound 10c

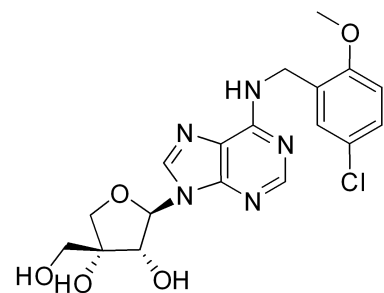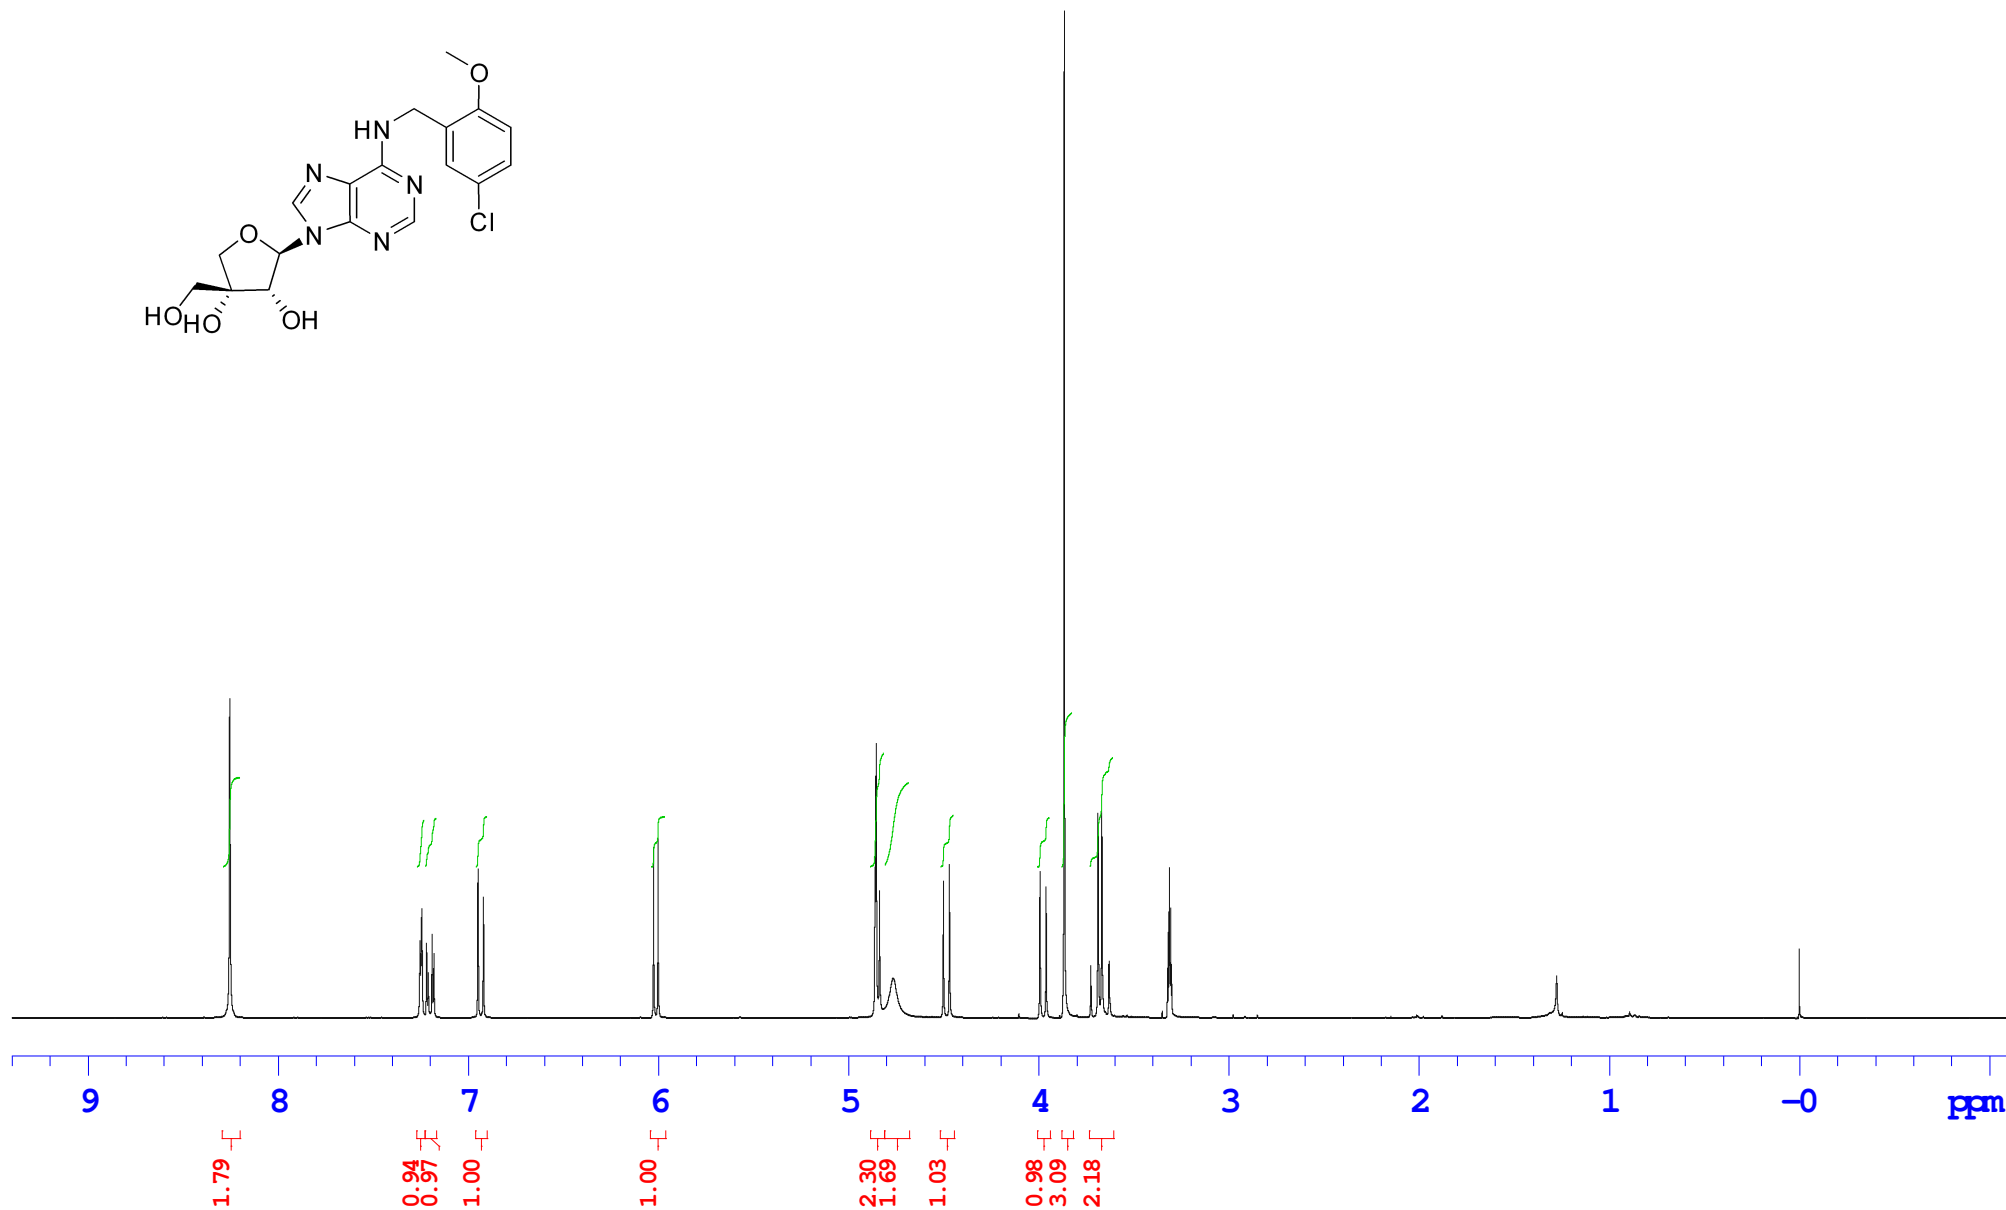

C NMR: Compound 10c

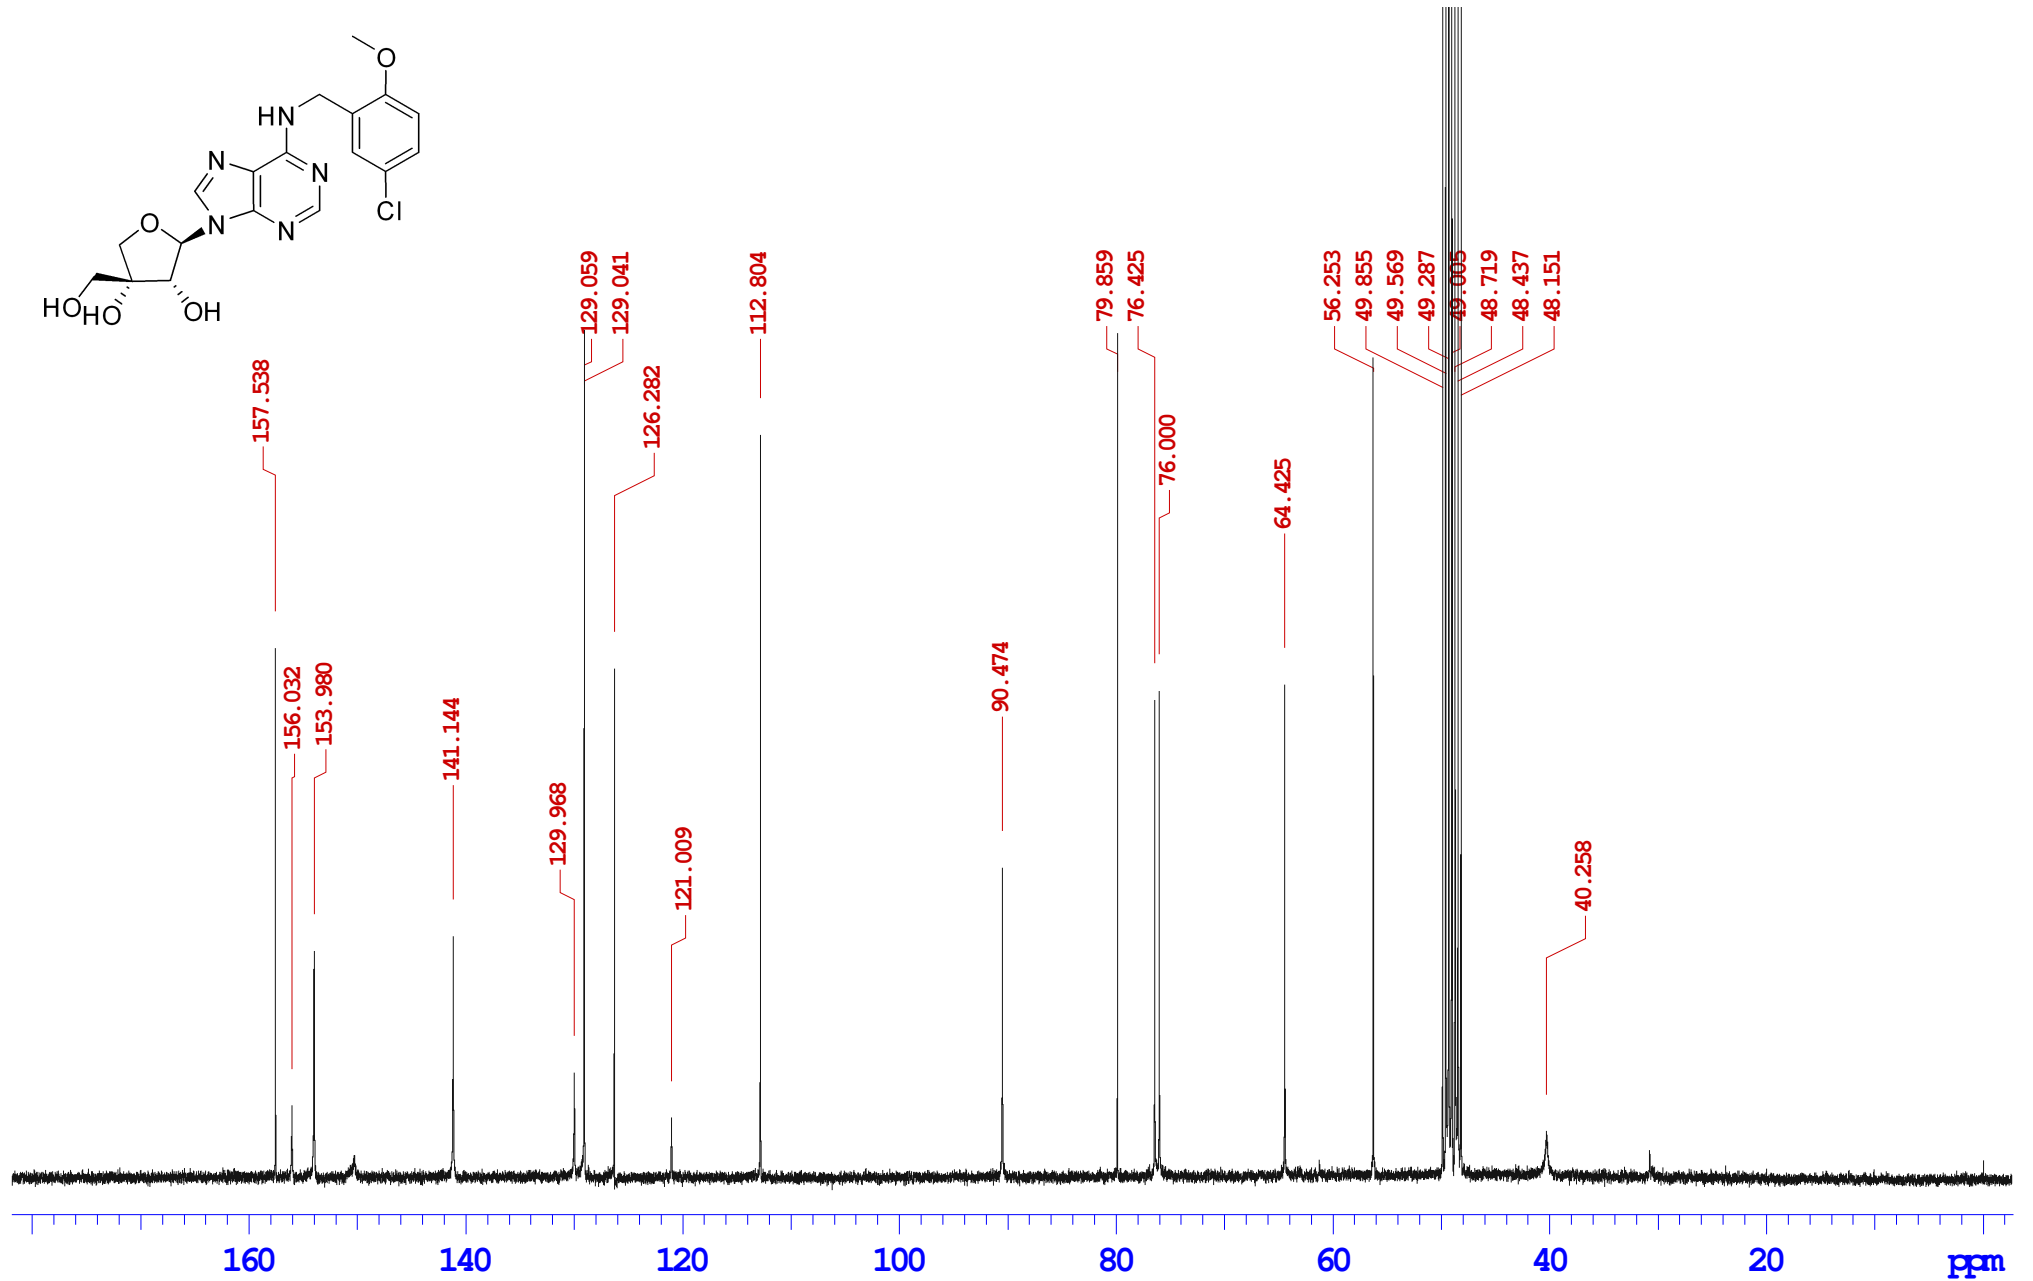



H NMR: Compound 11a

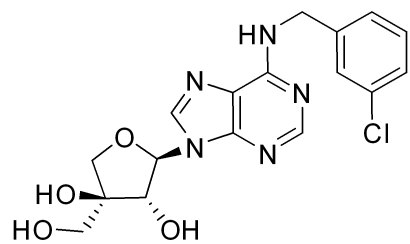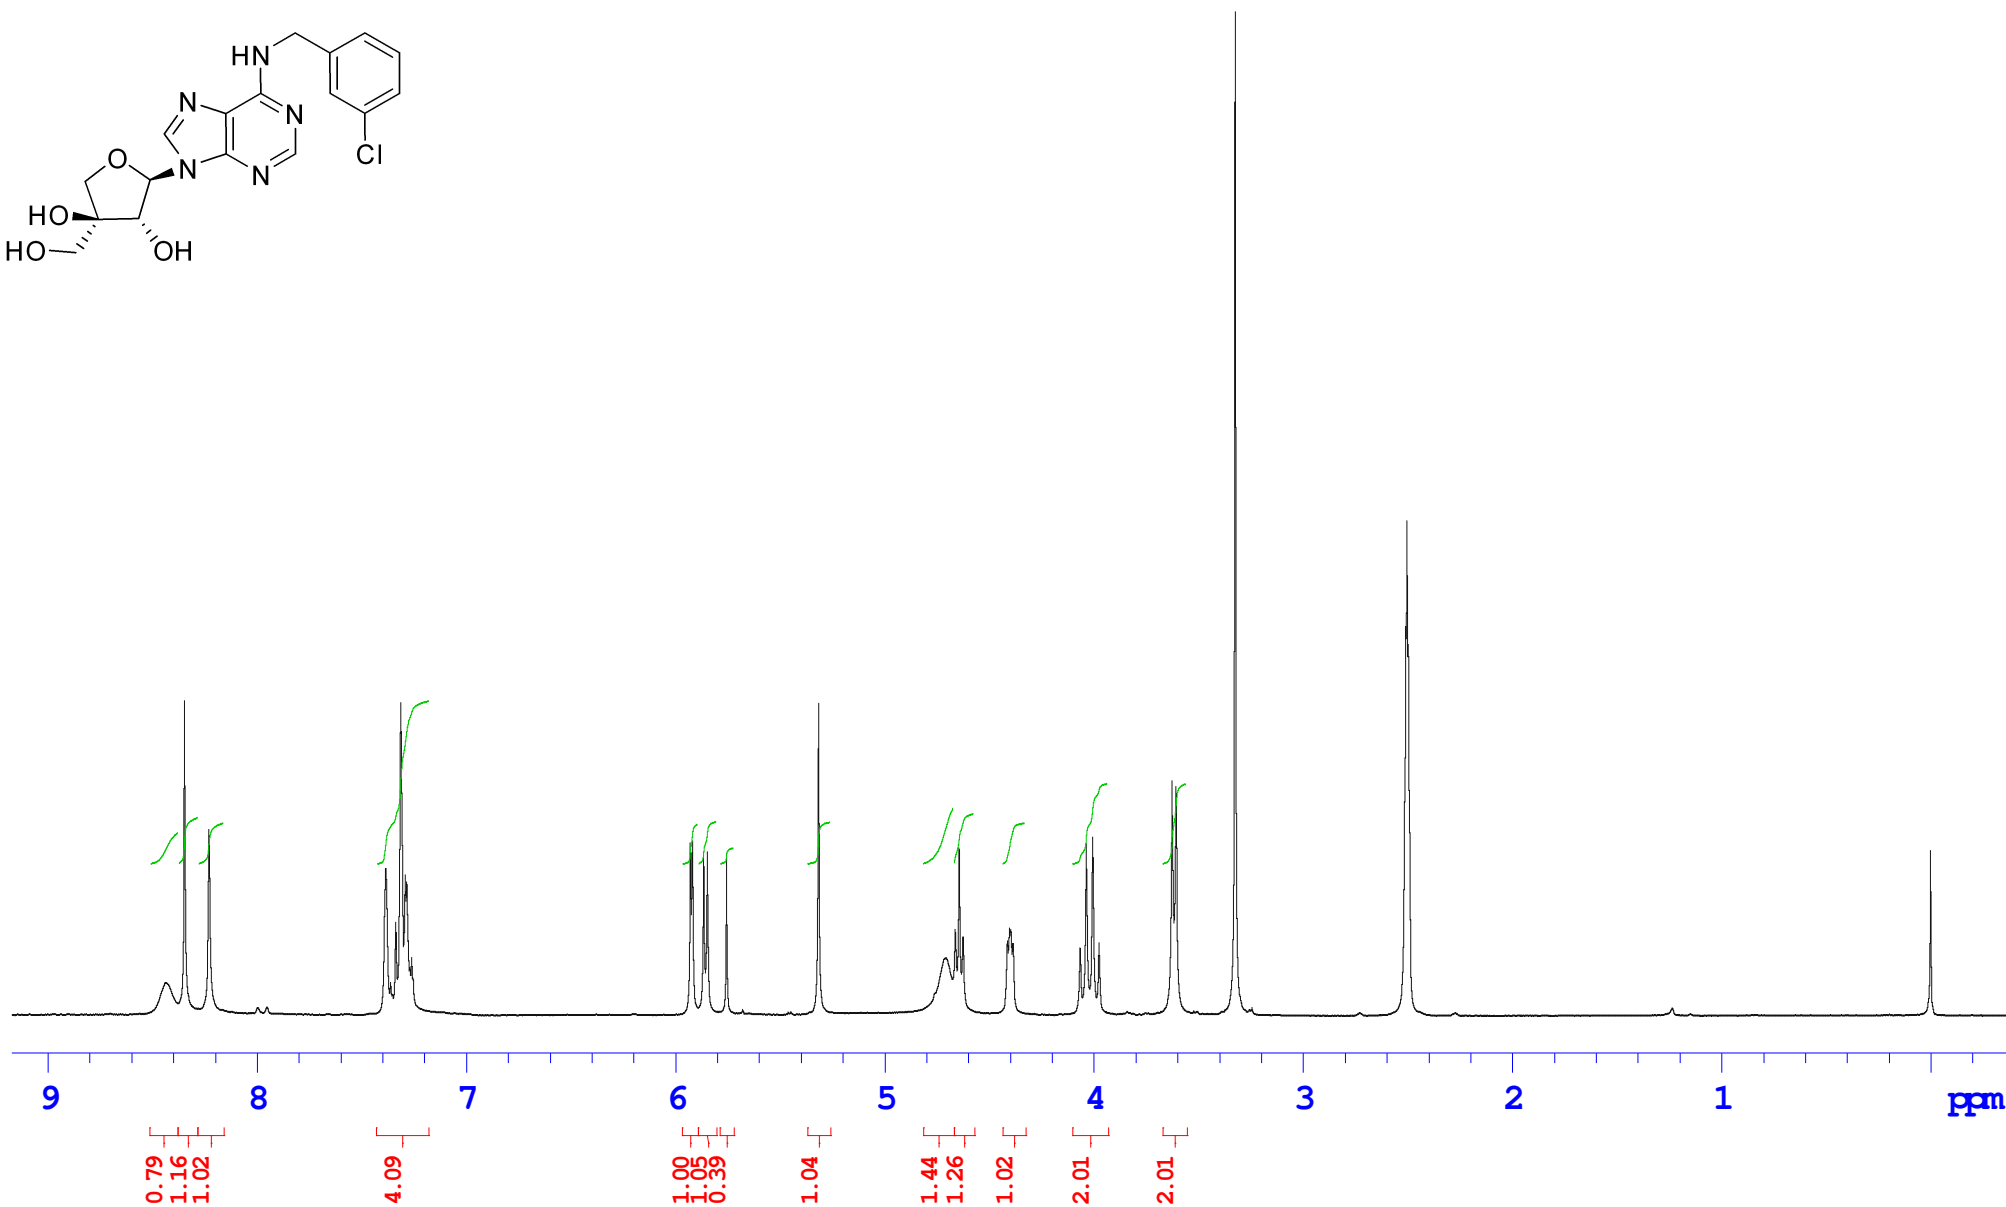

C NMR: Compound 11a

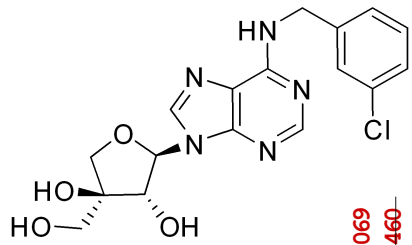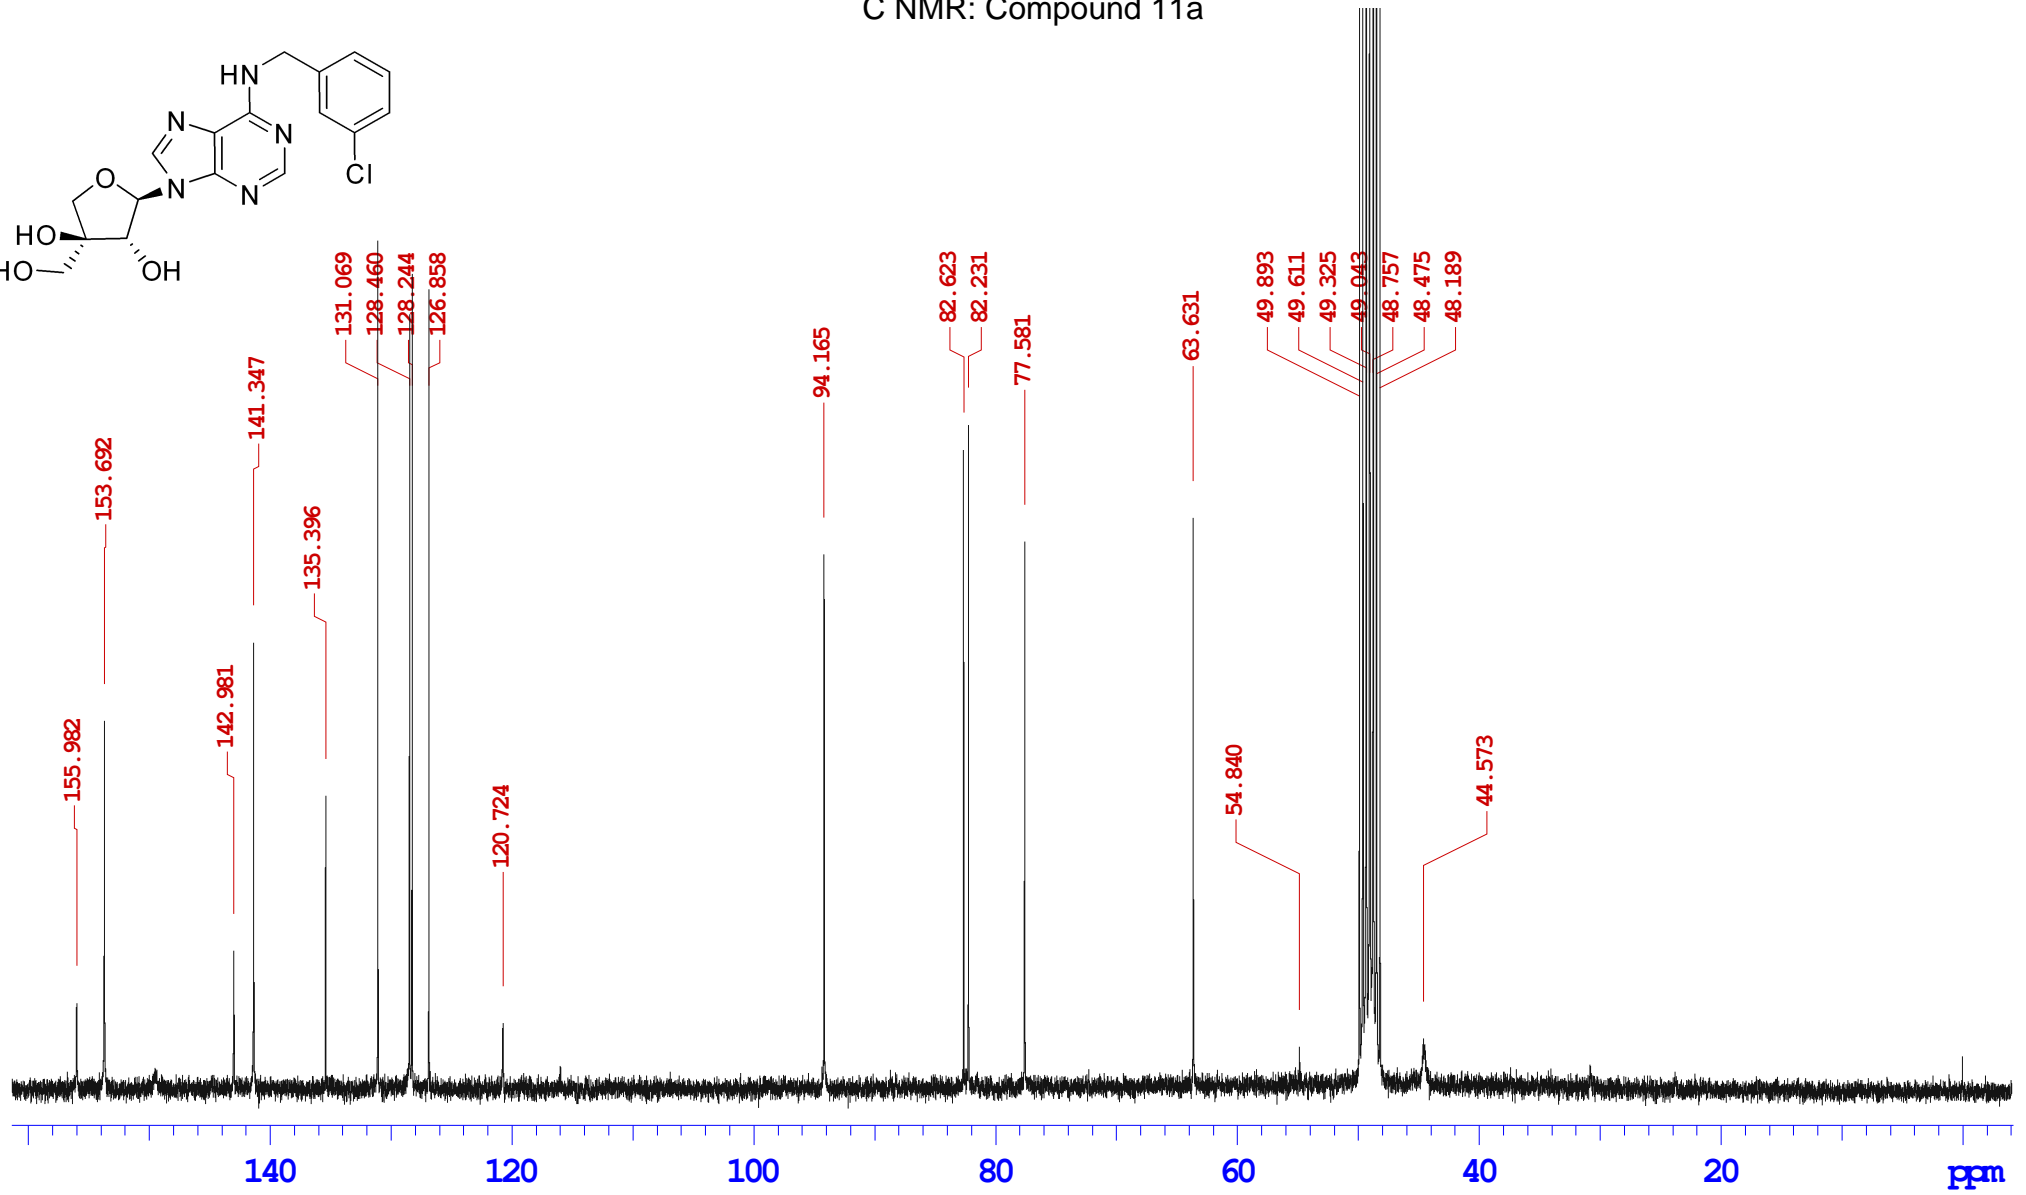

H NMR: Compound 11b

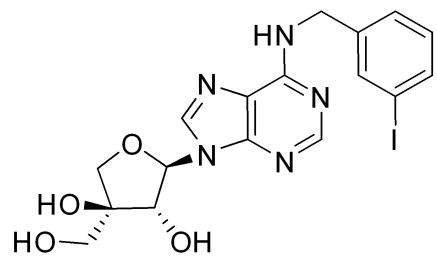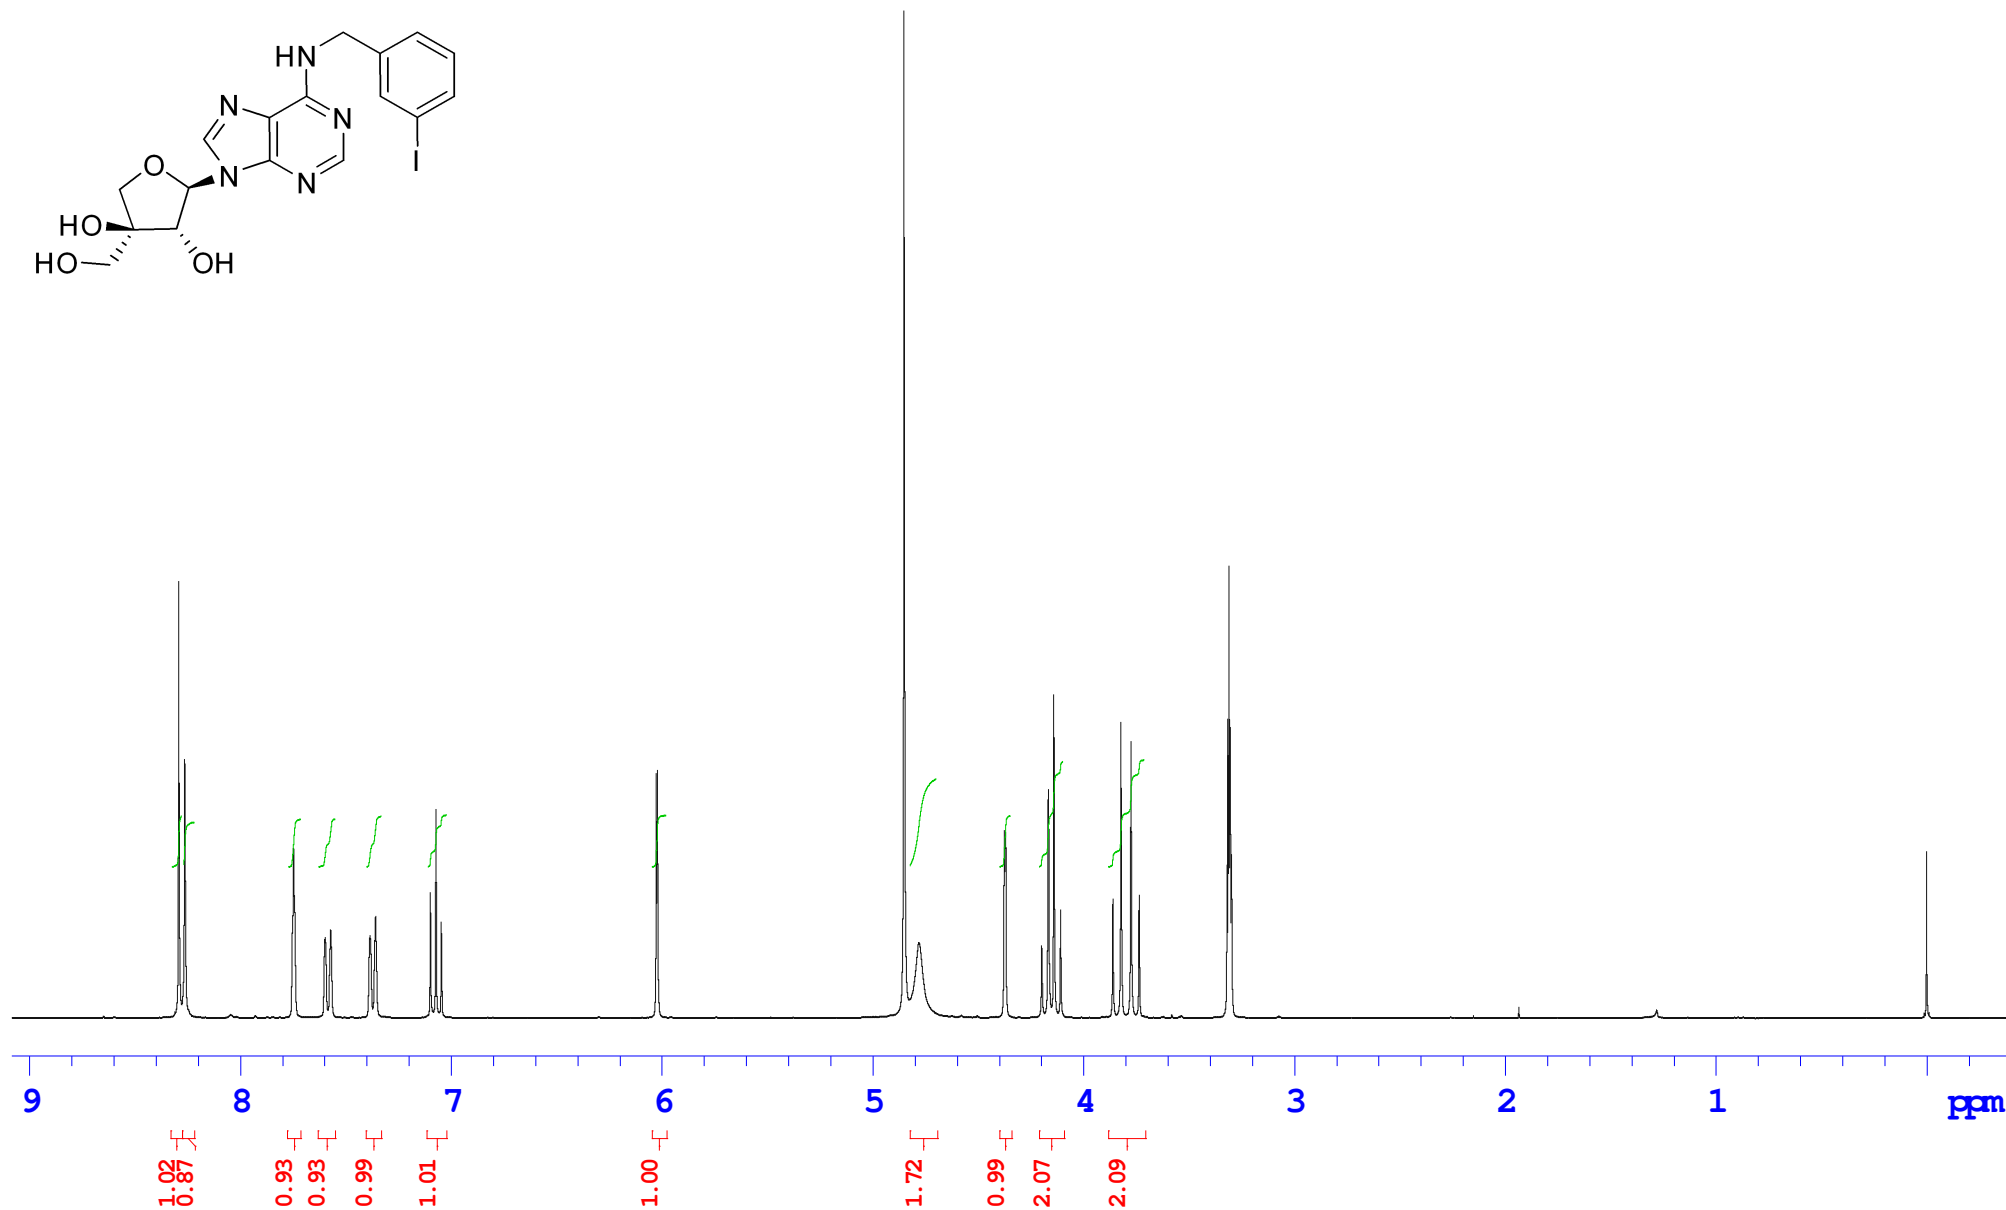

C NMR: Compound 11b

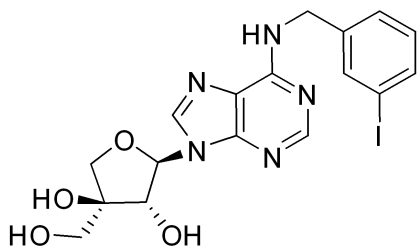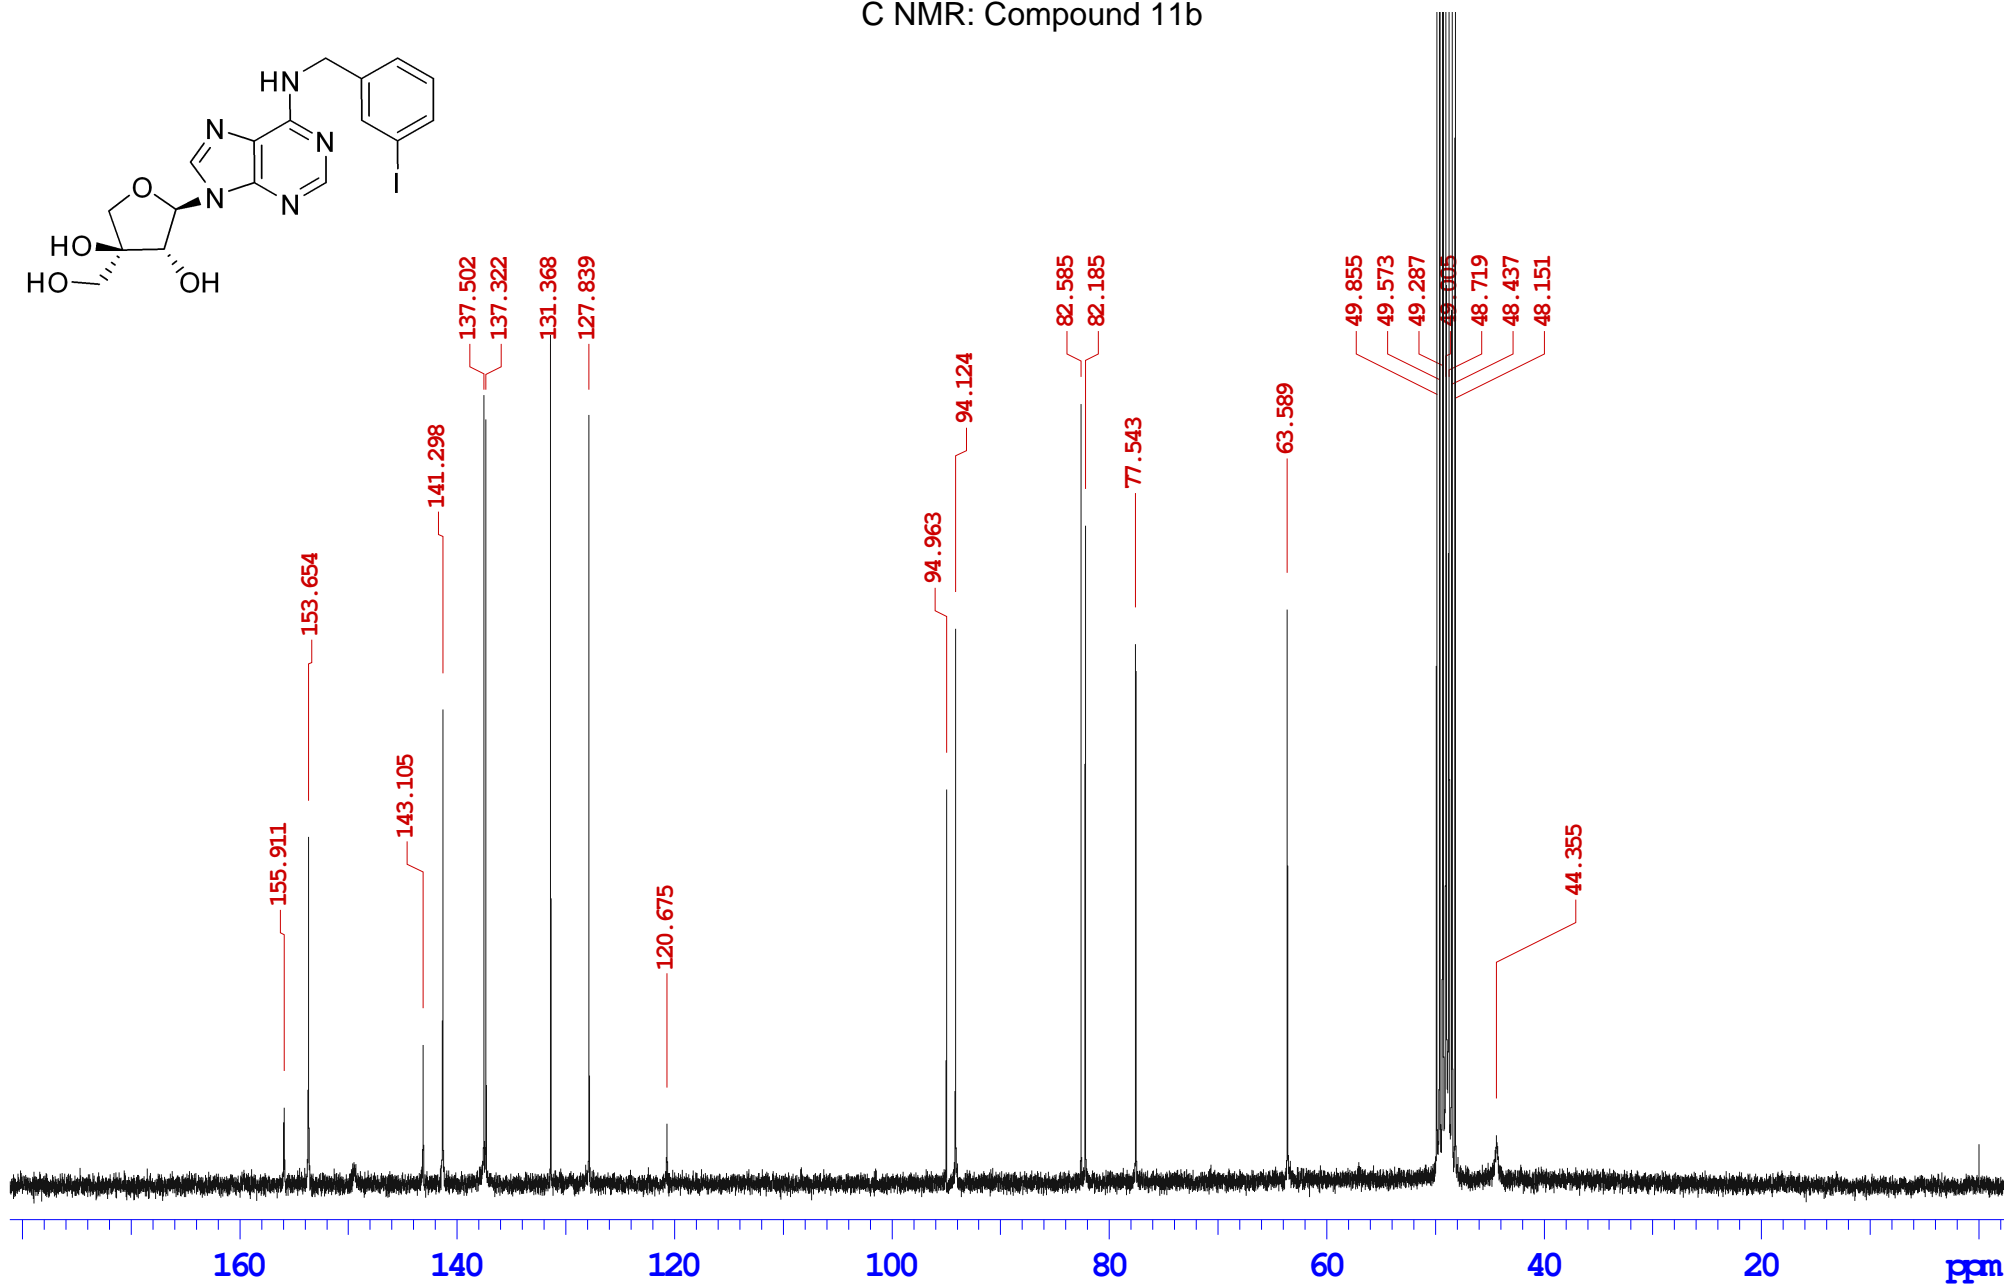

H NMR: Compound 11c

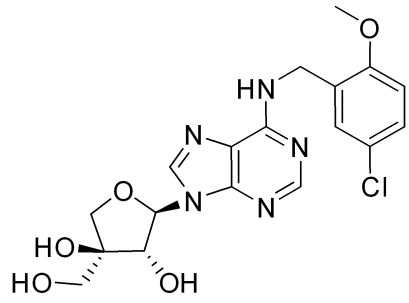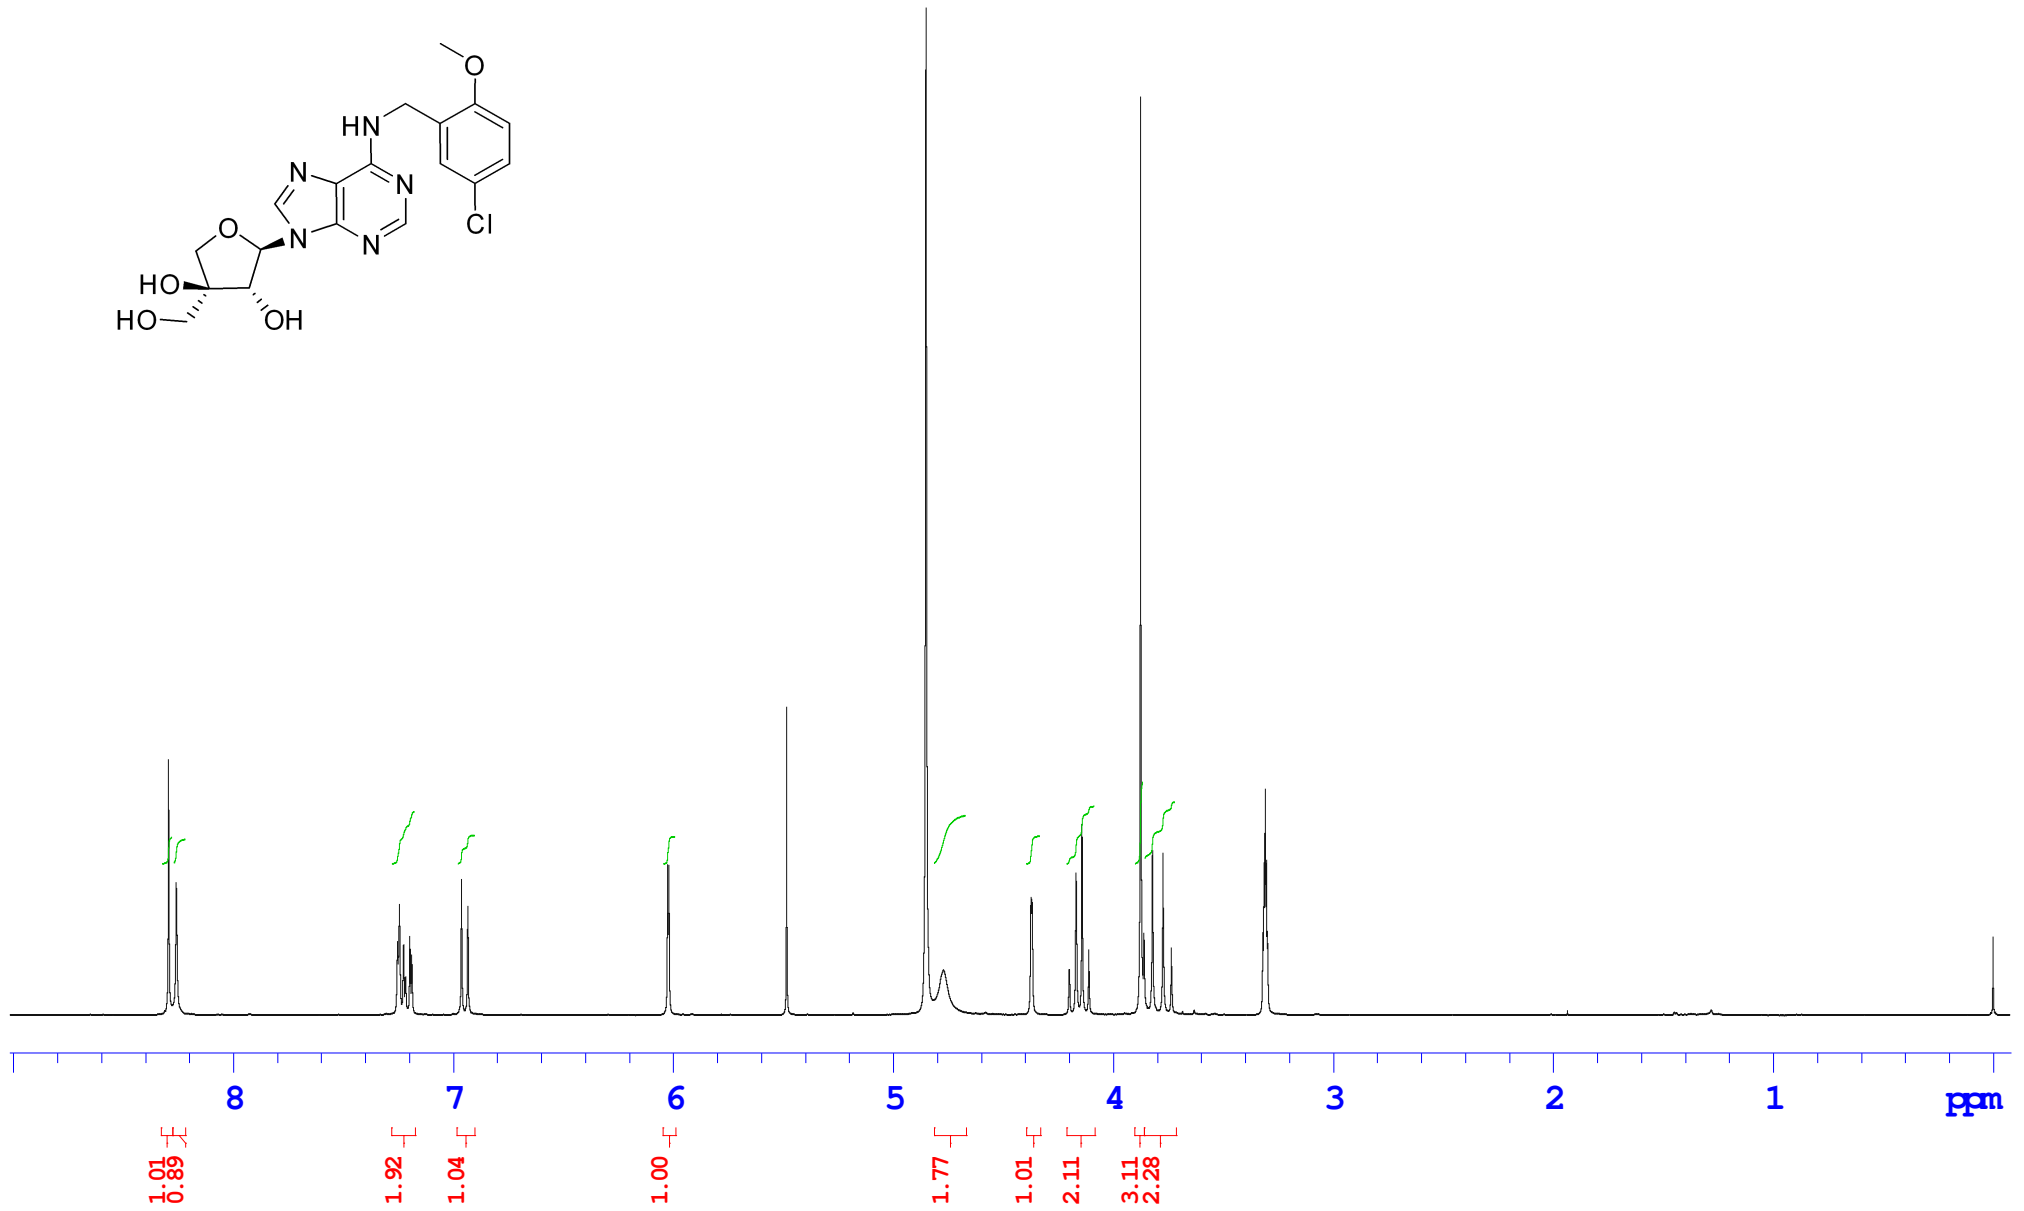

C NMR: Compound 11c

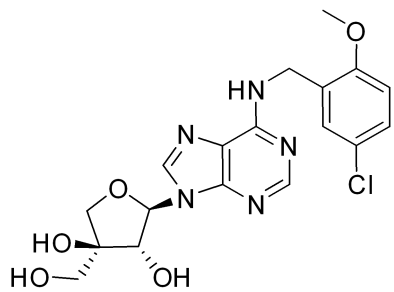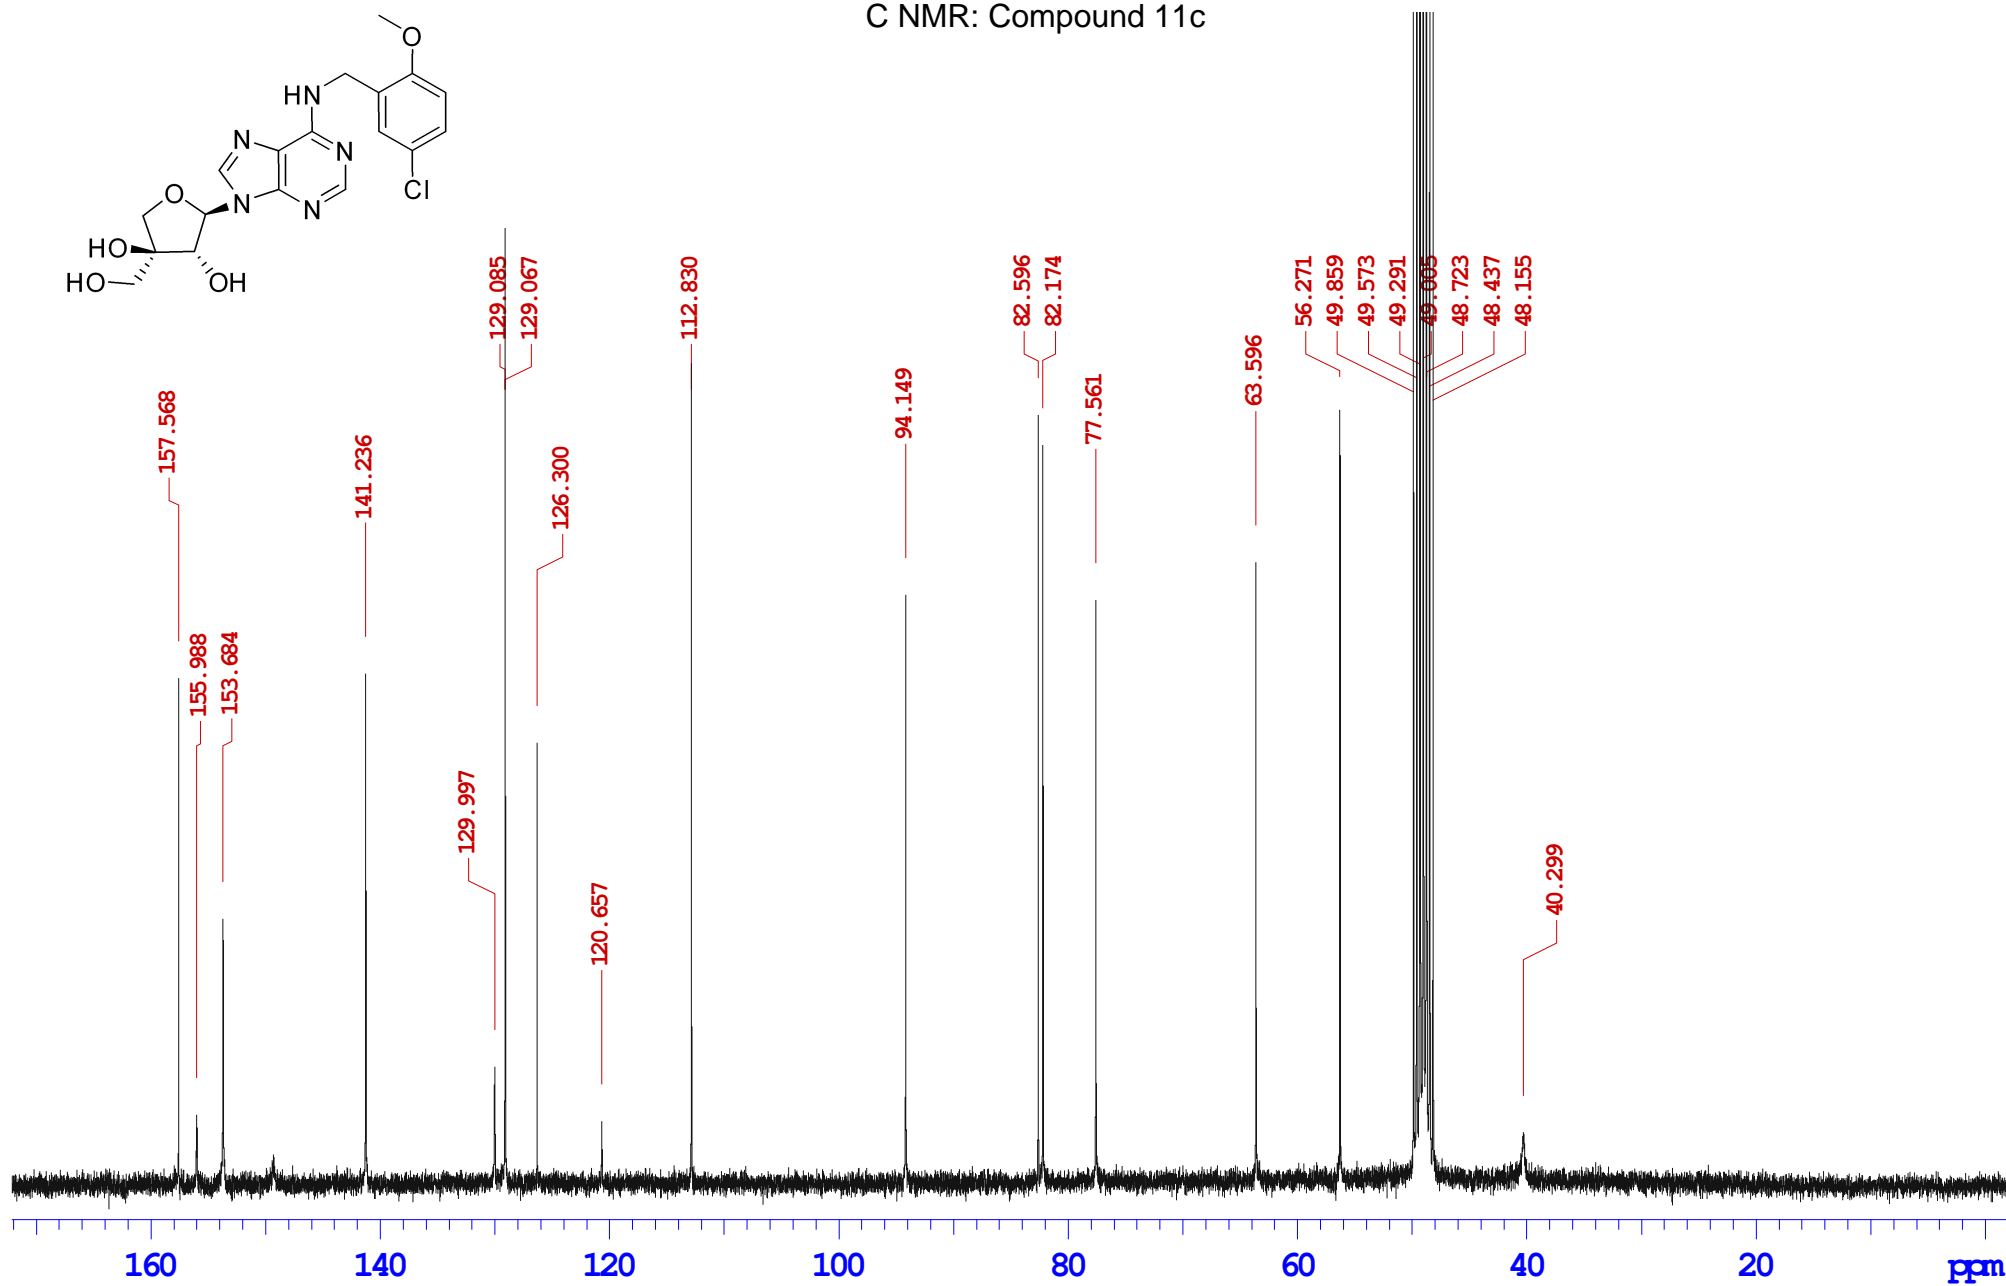

H NMR: Compound 12

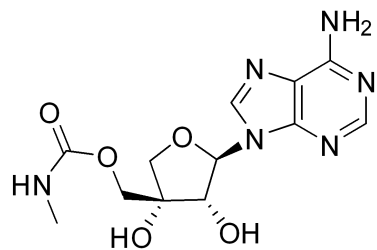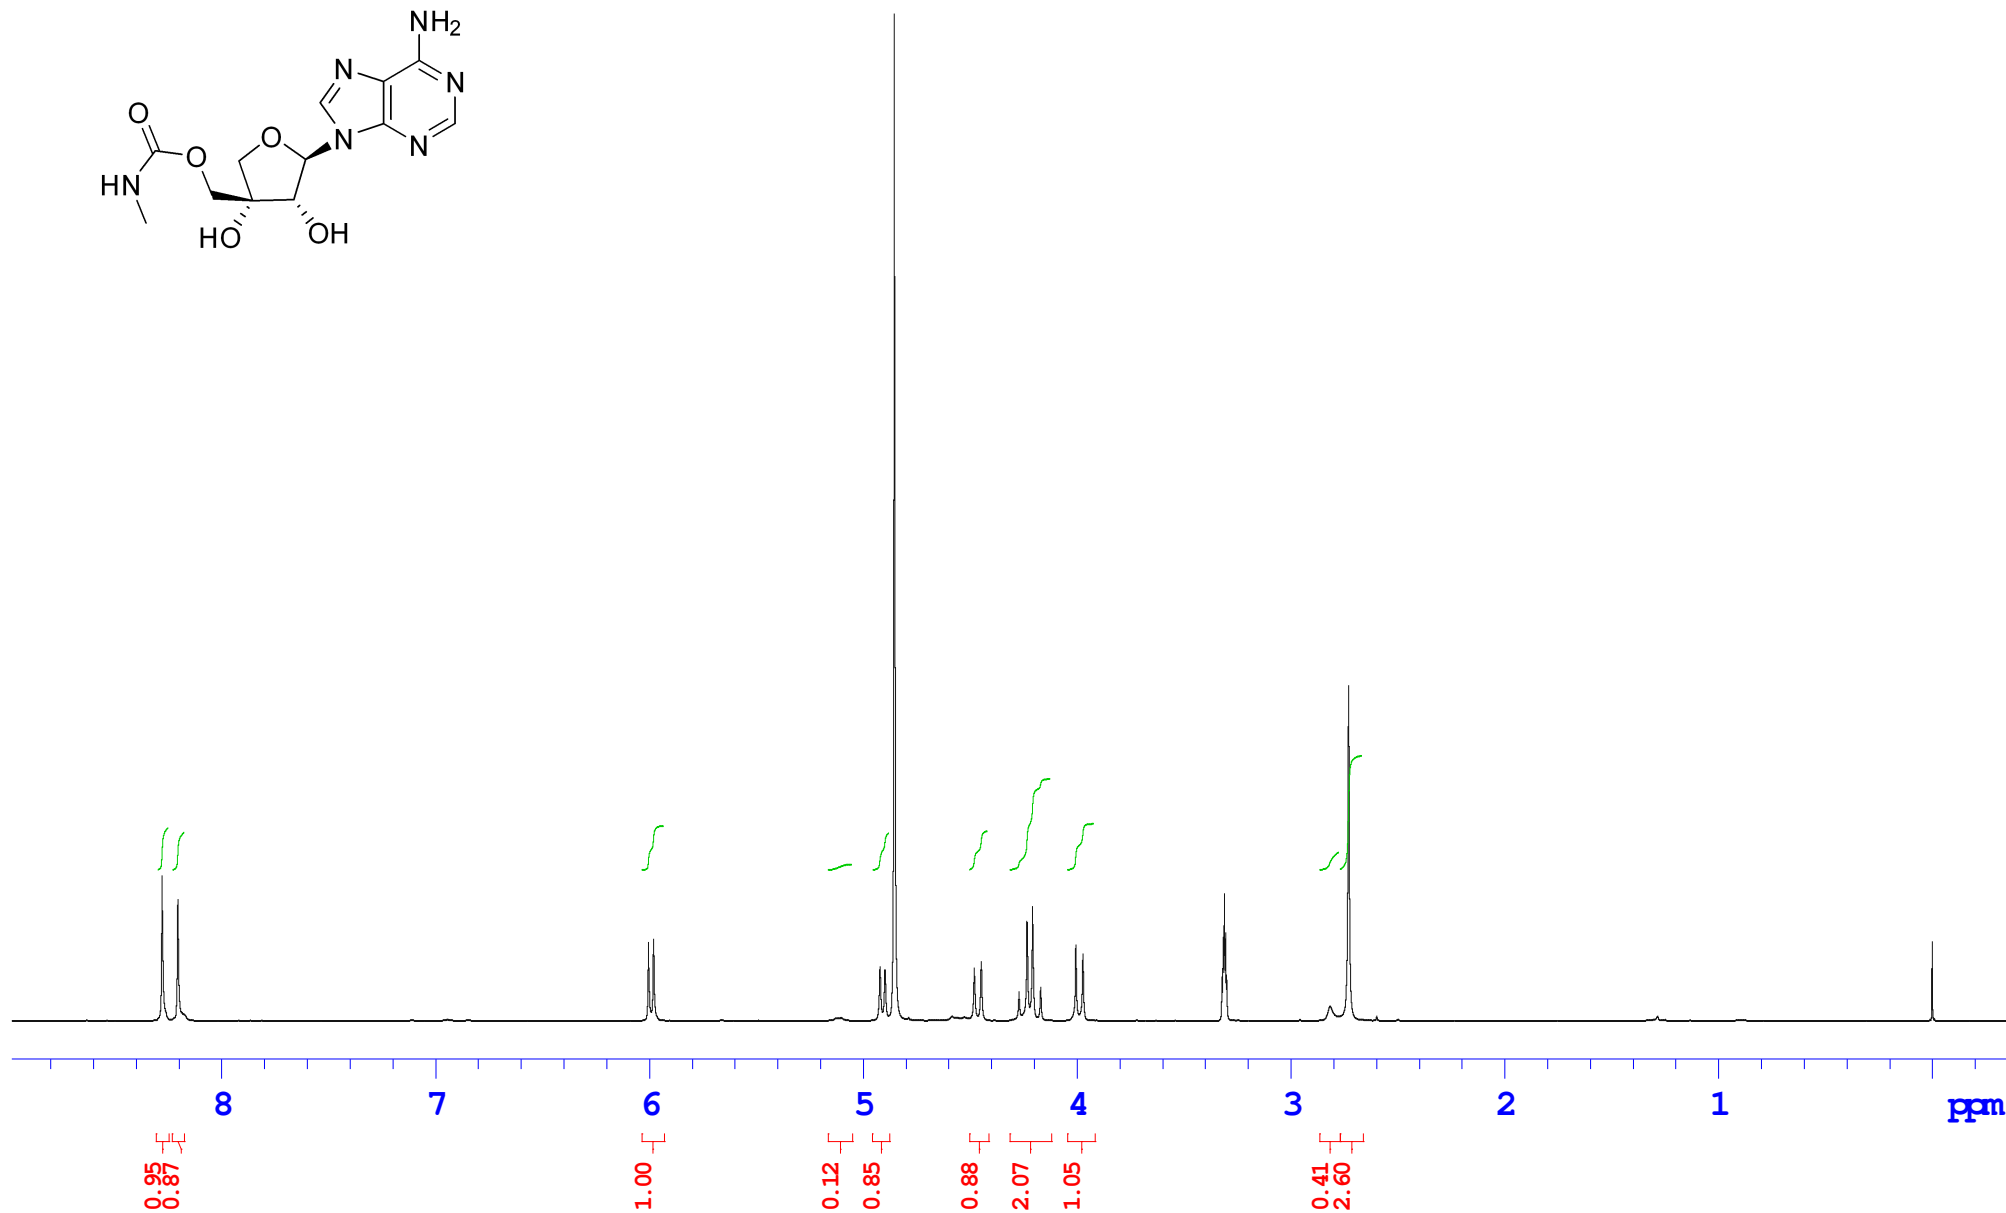

C NMR: Compound 12

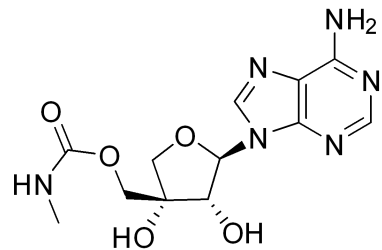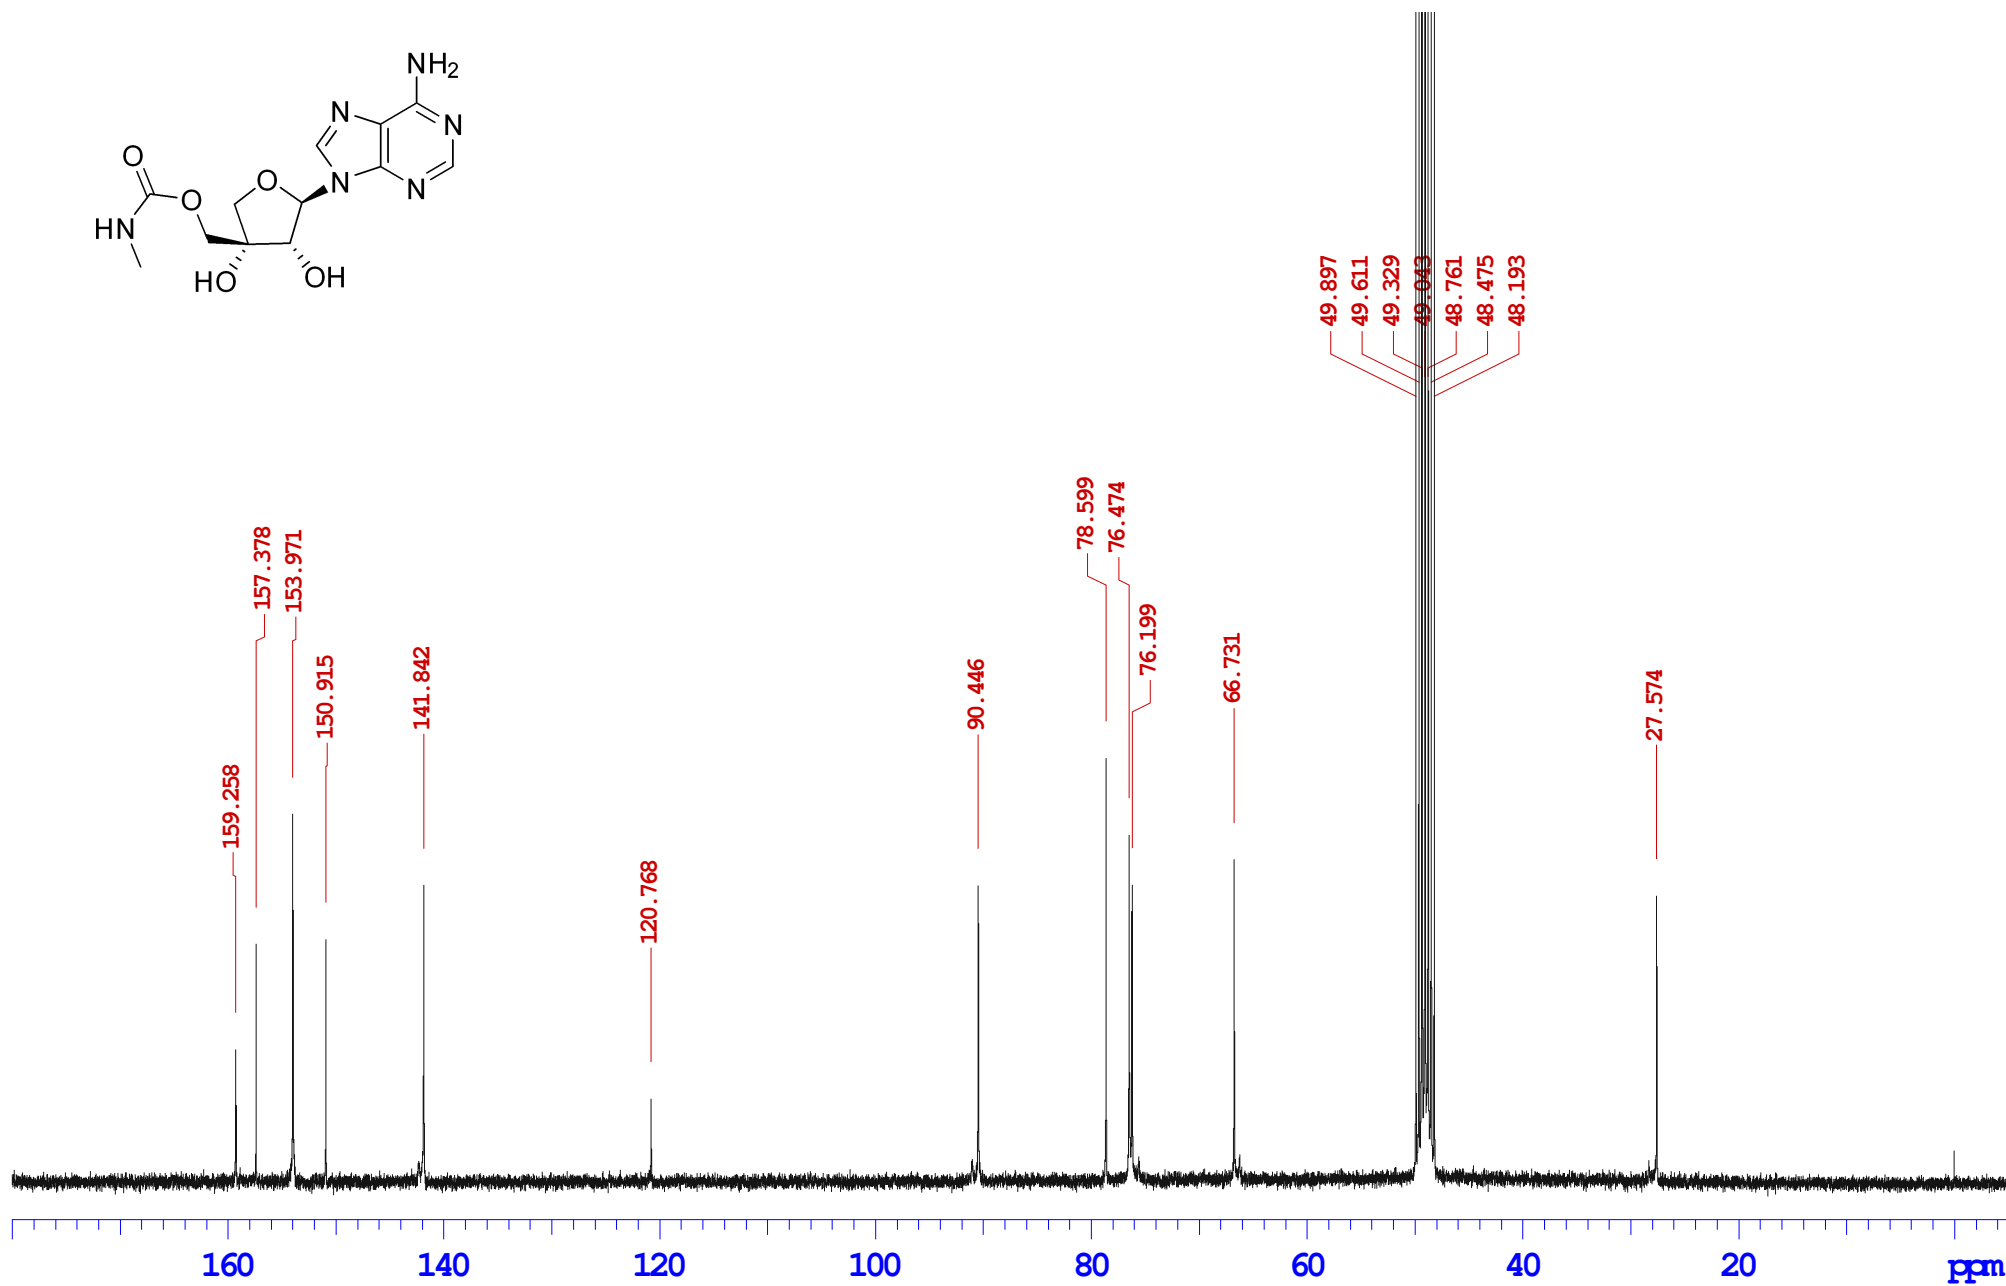



H NMR: Compound 13

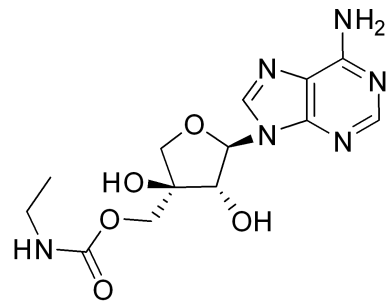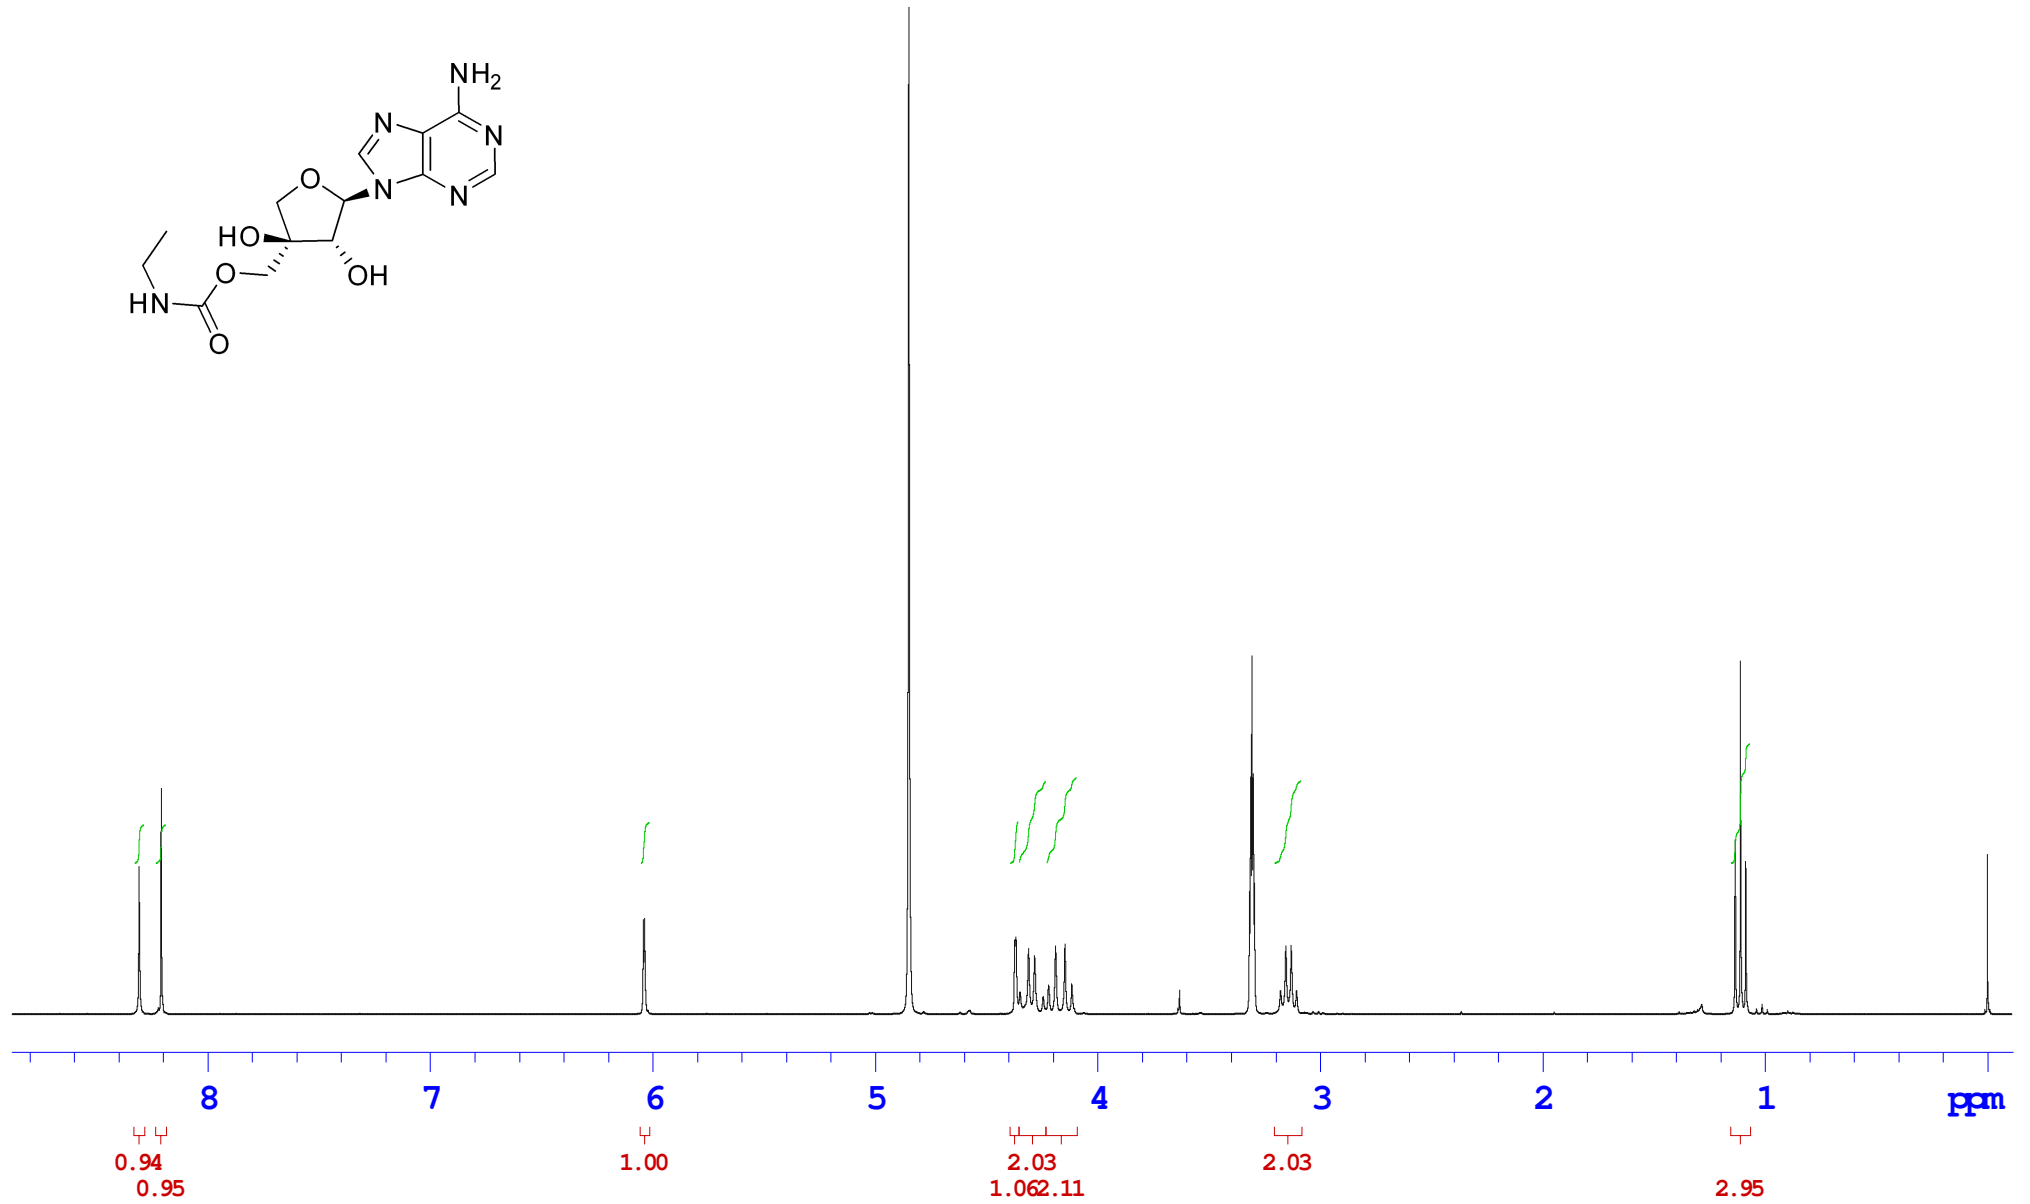

C NMR: Compound 13

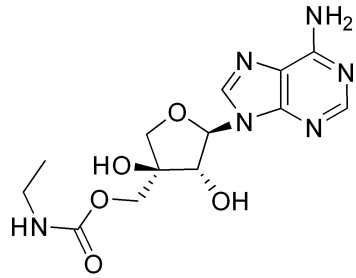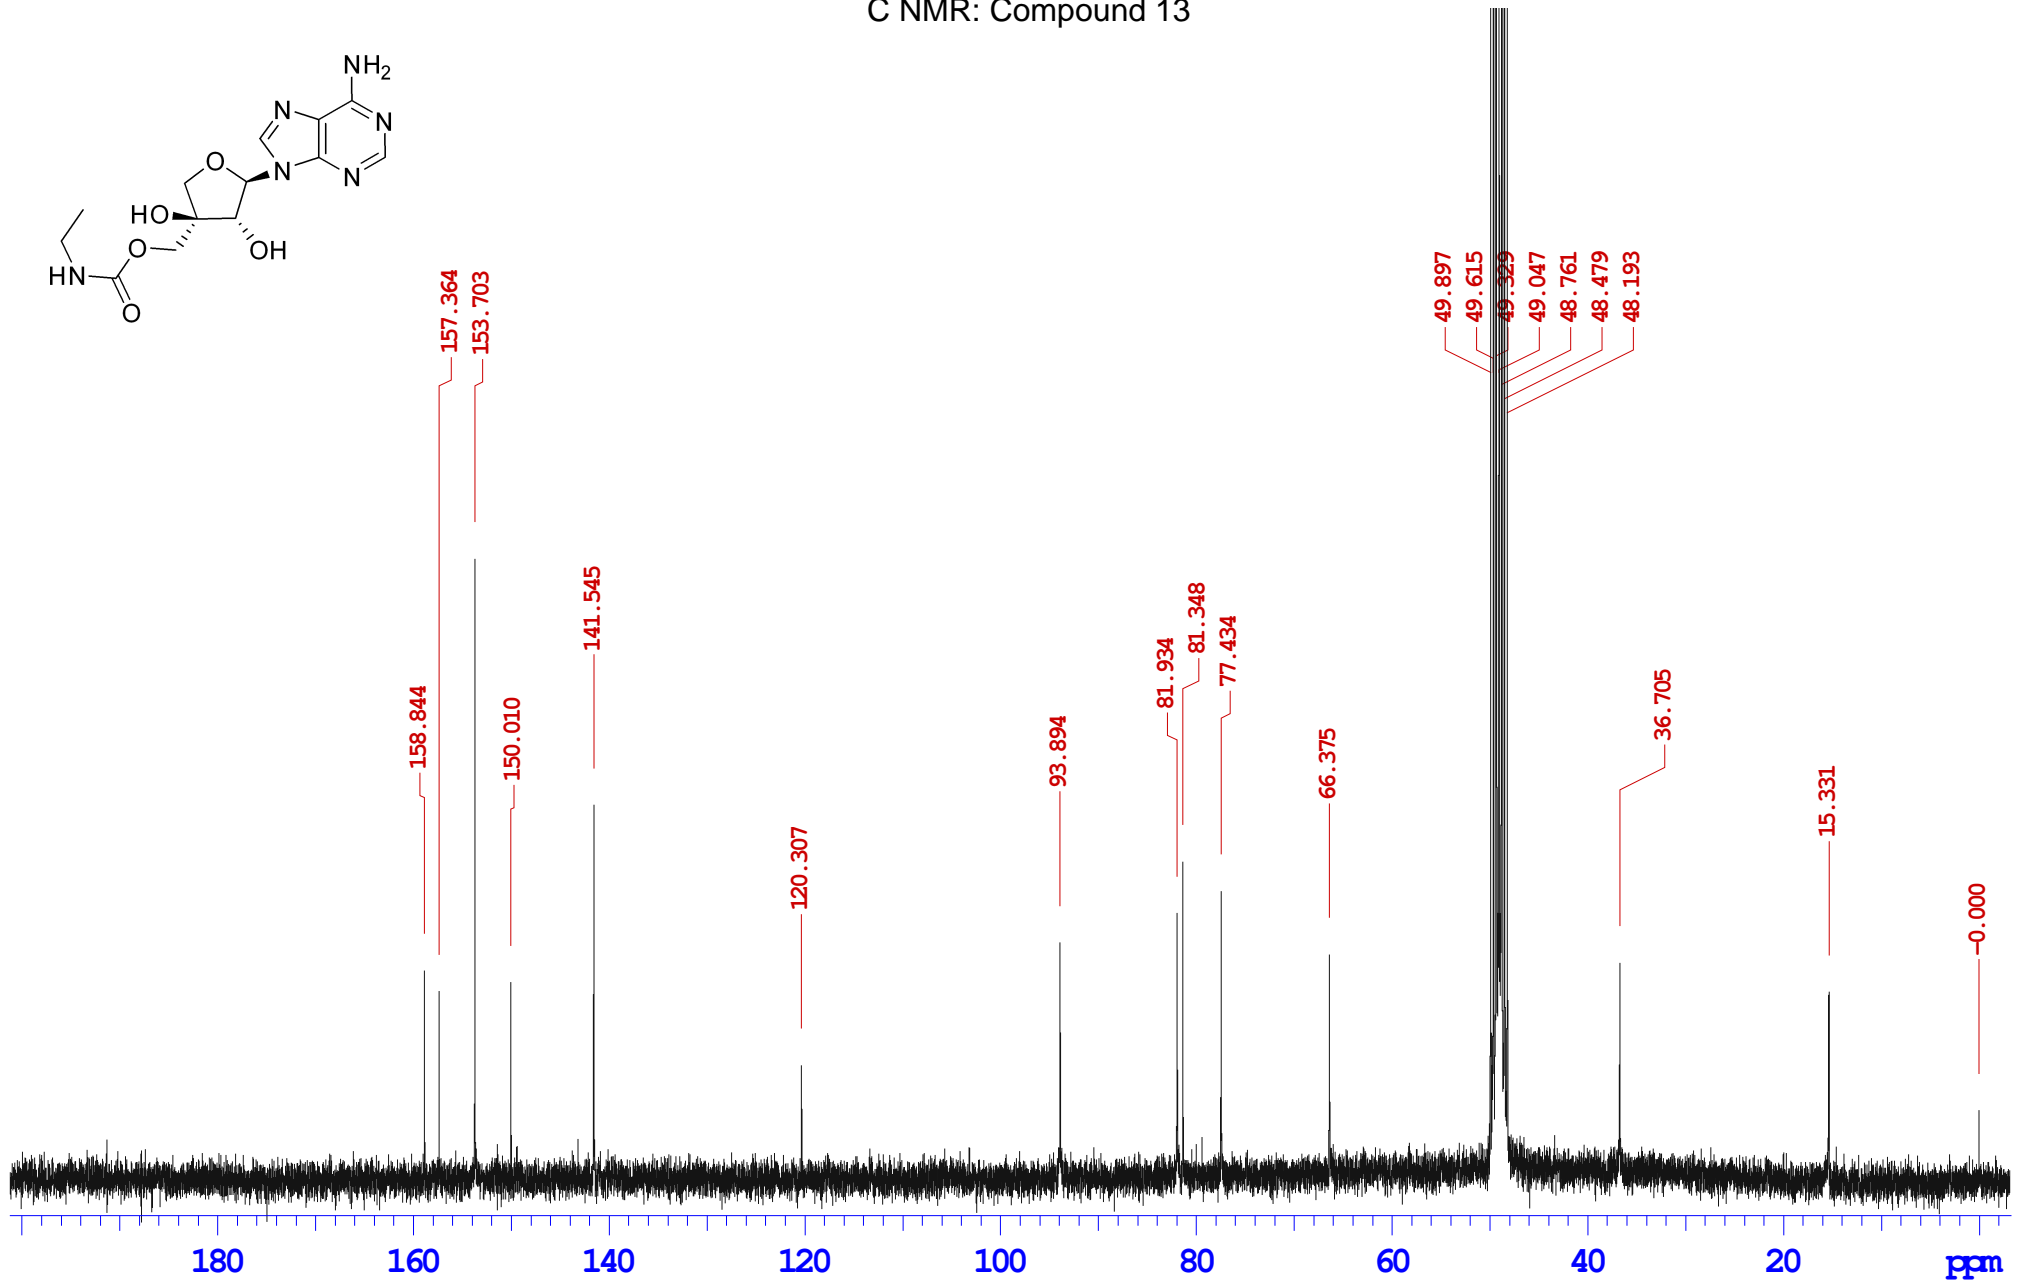

H NMR: Compound 14

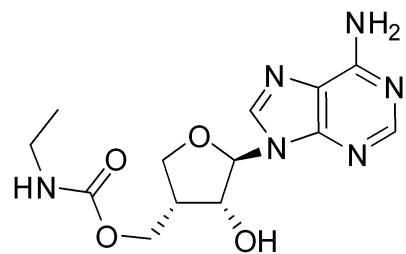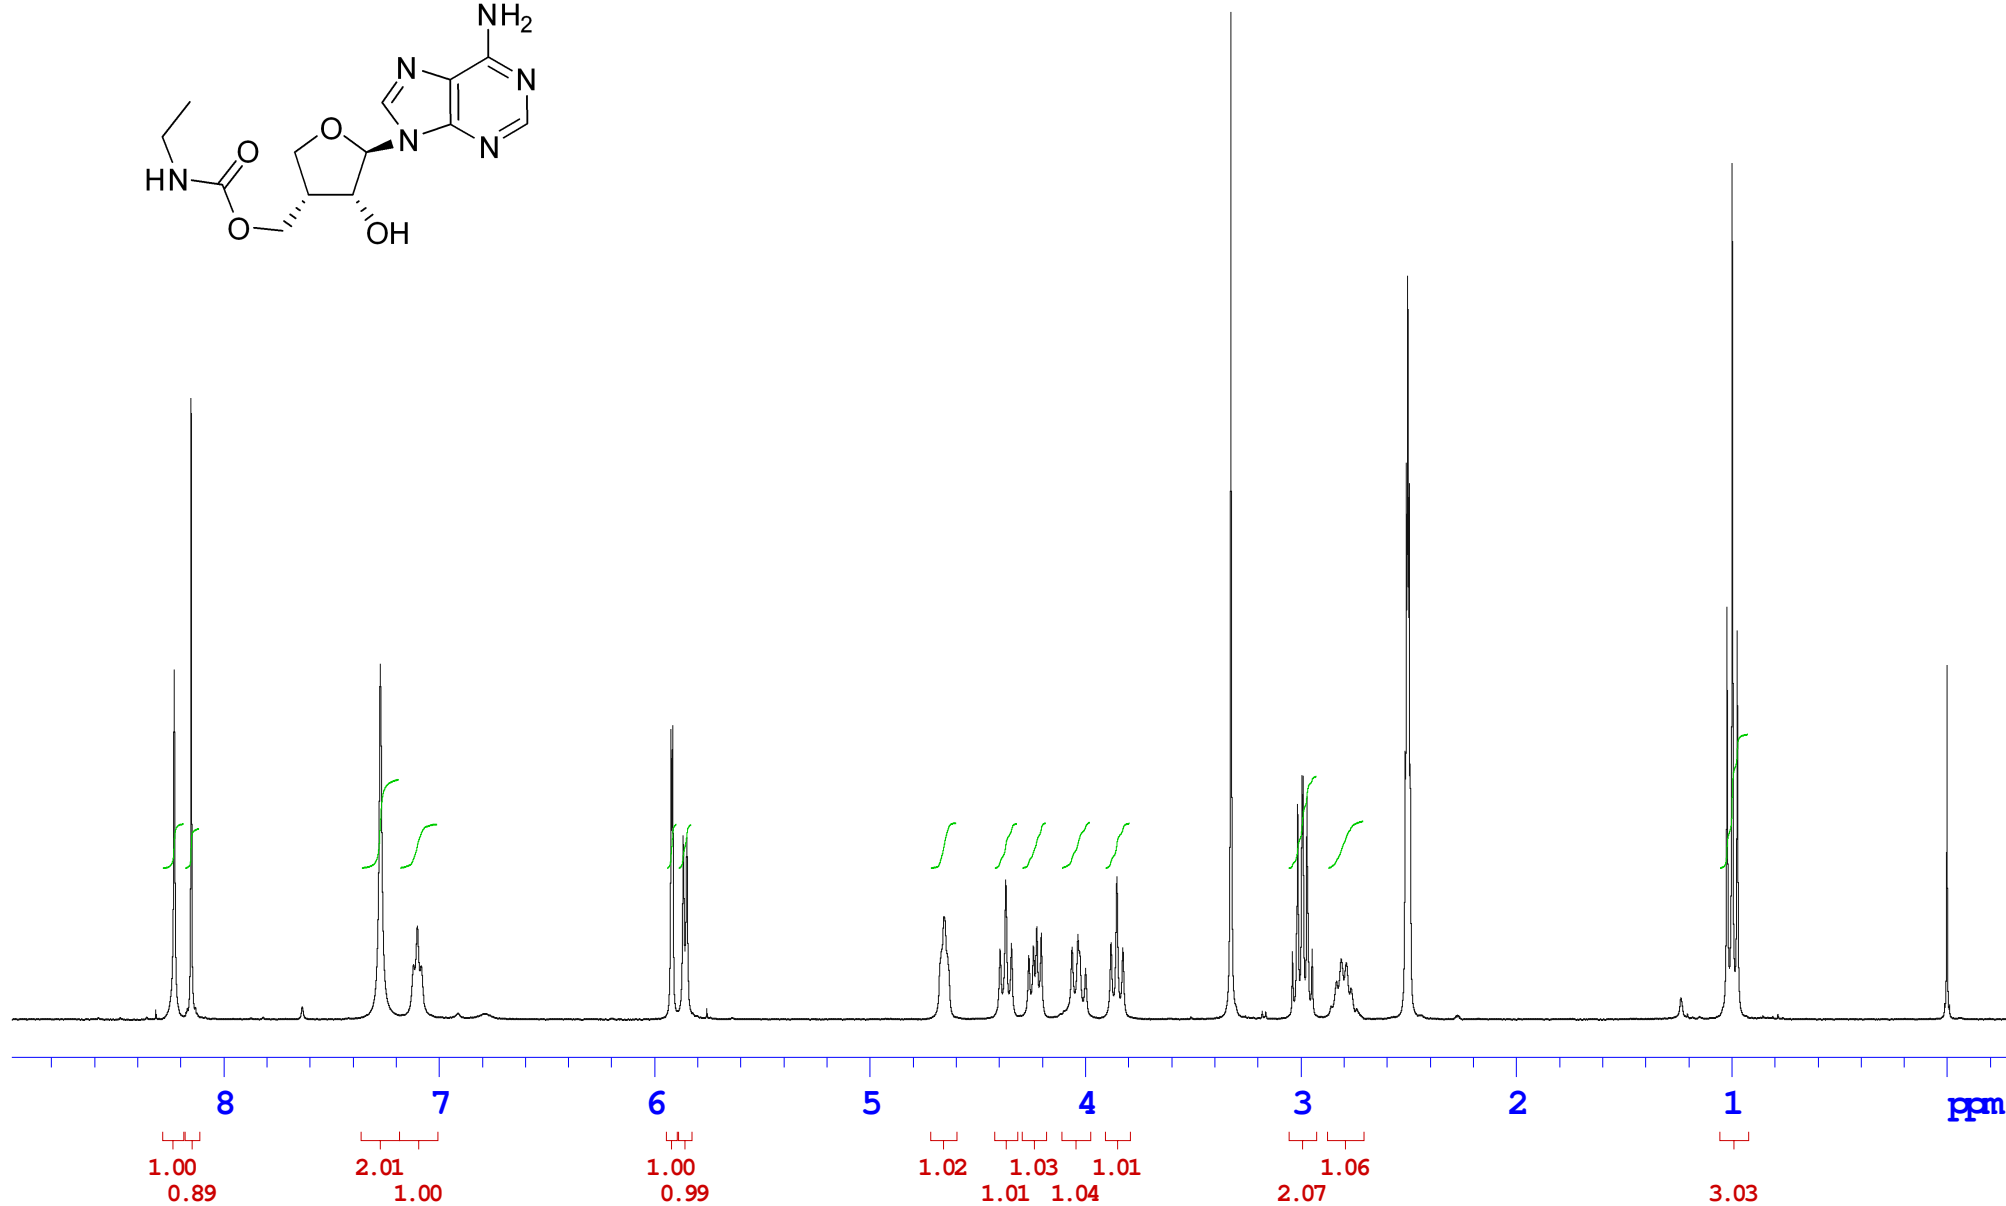

C NMR: Compound 14

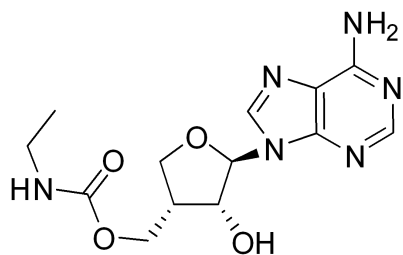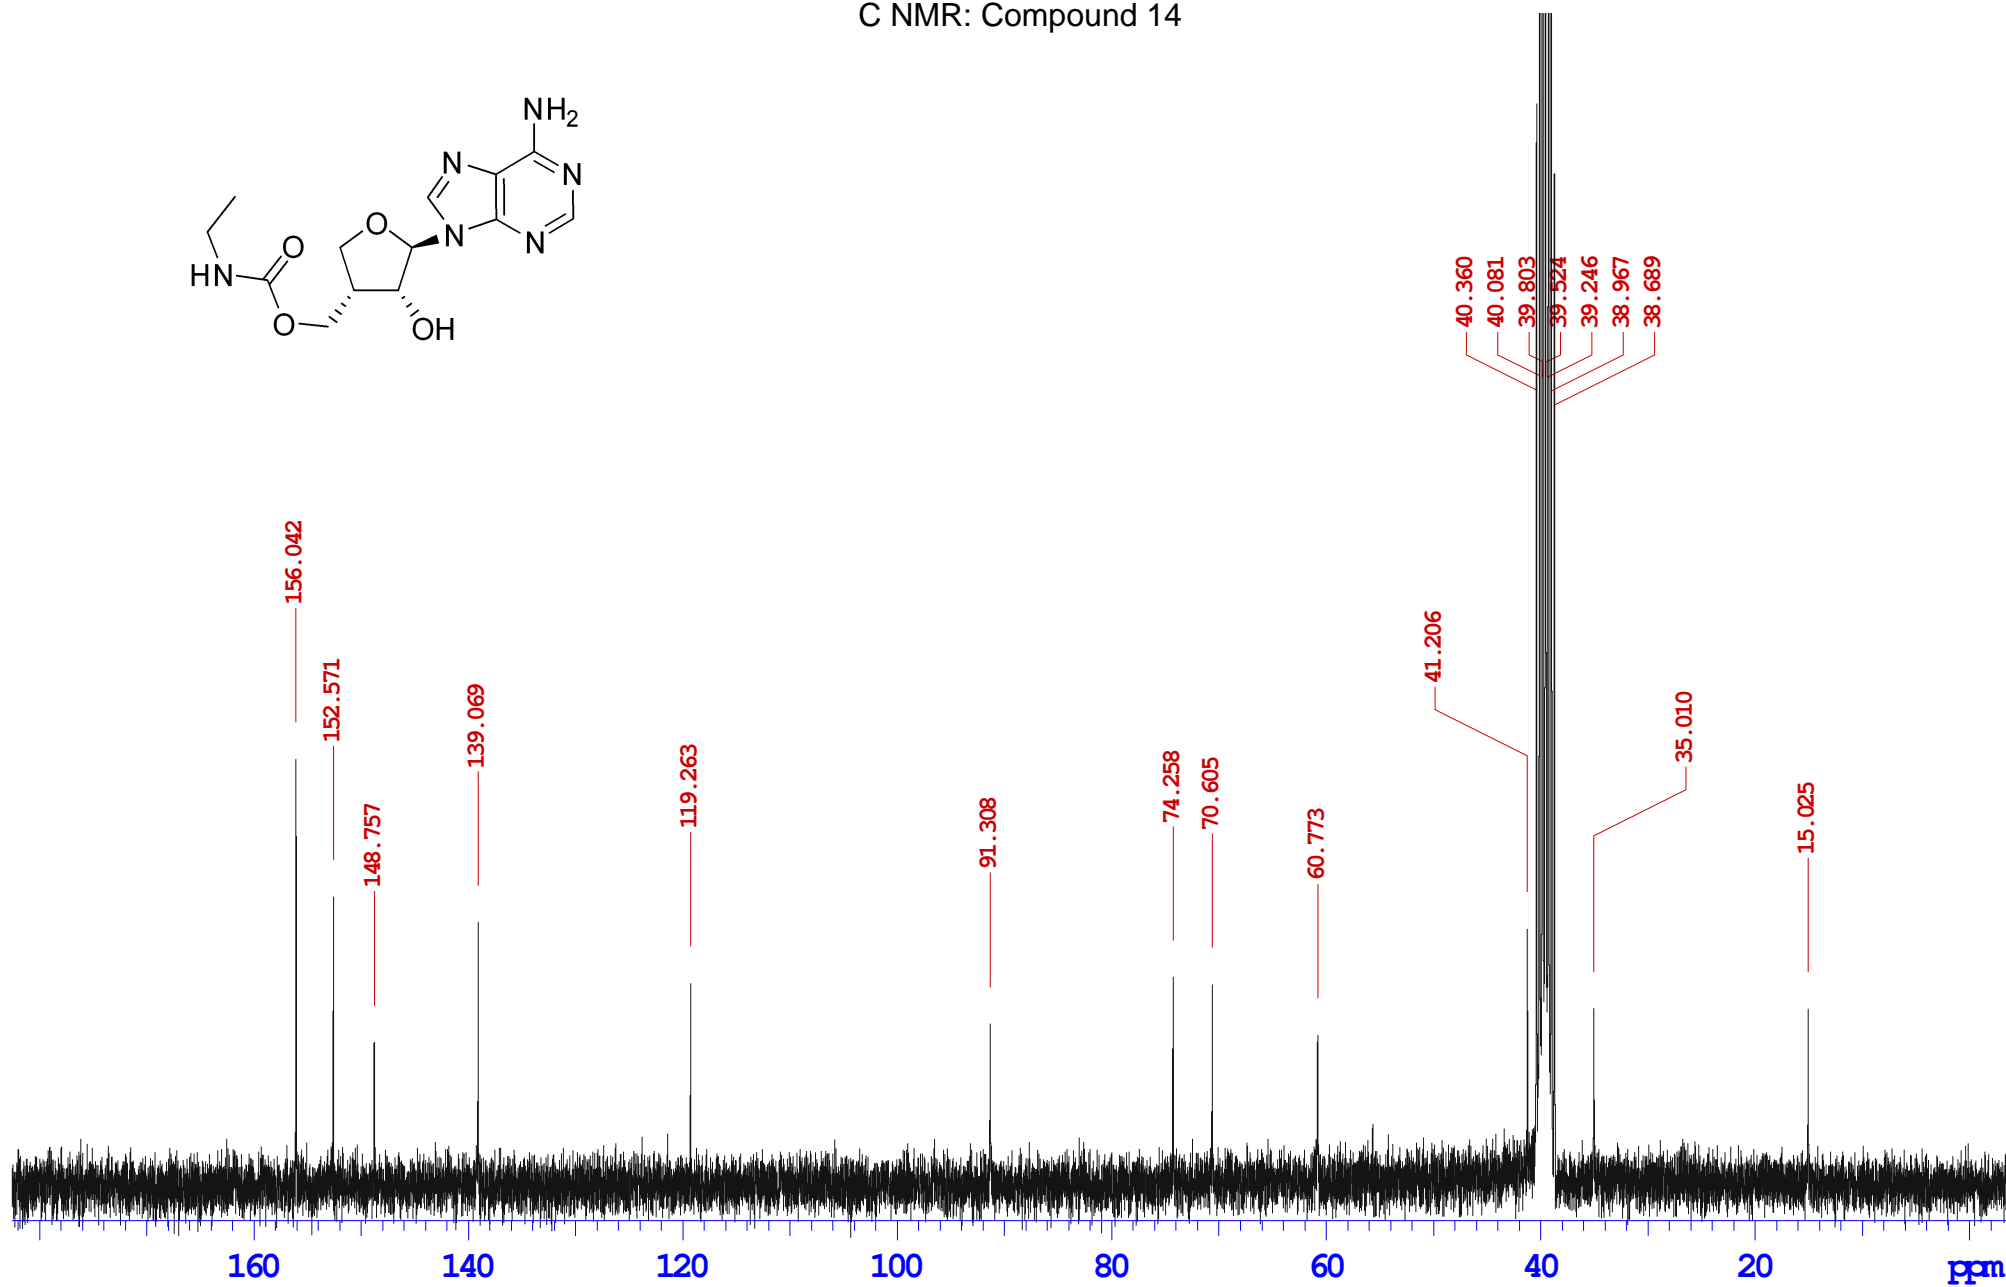

H NMR: Compound 15

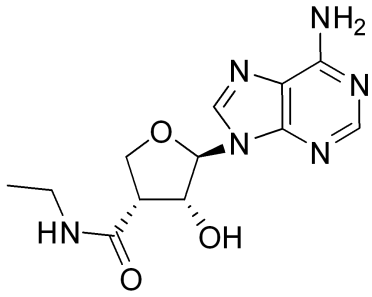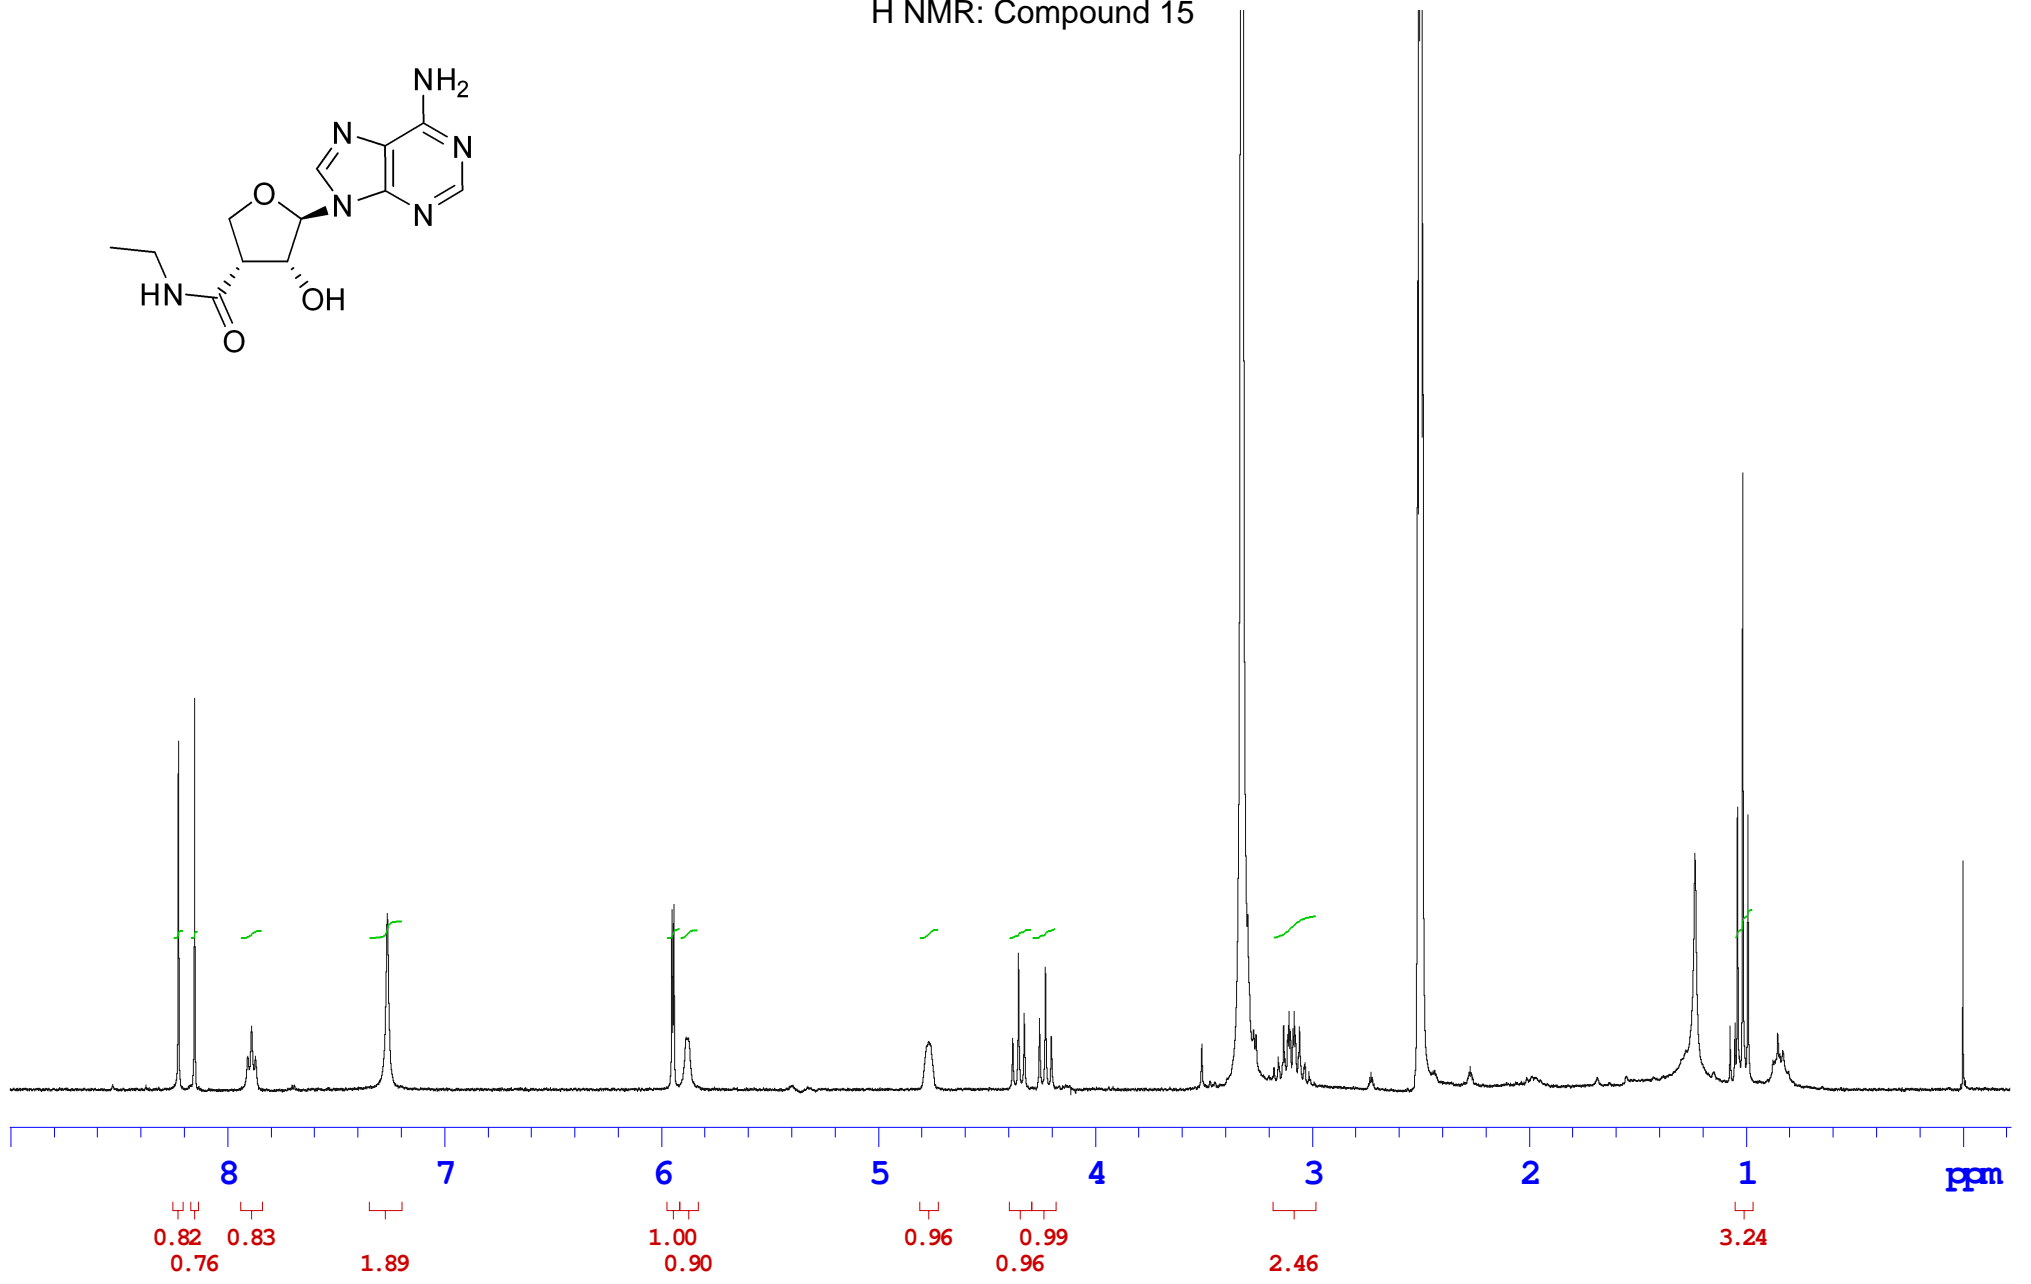

C NMR: Compound 15

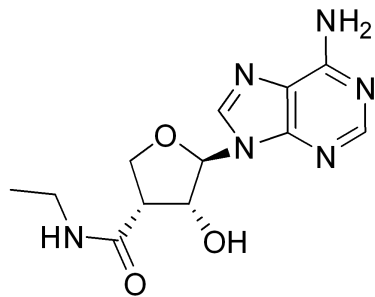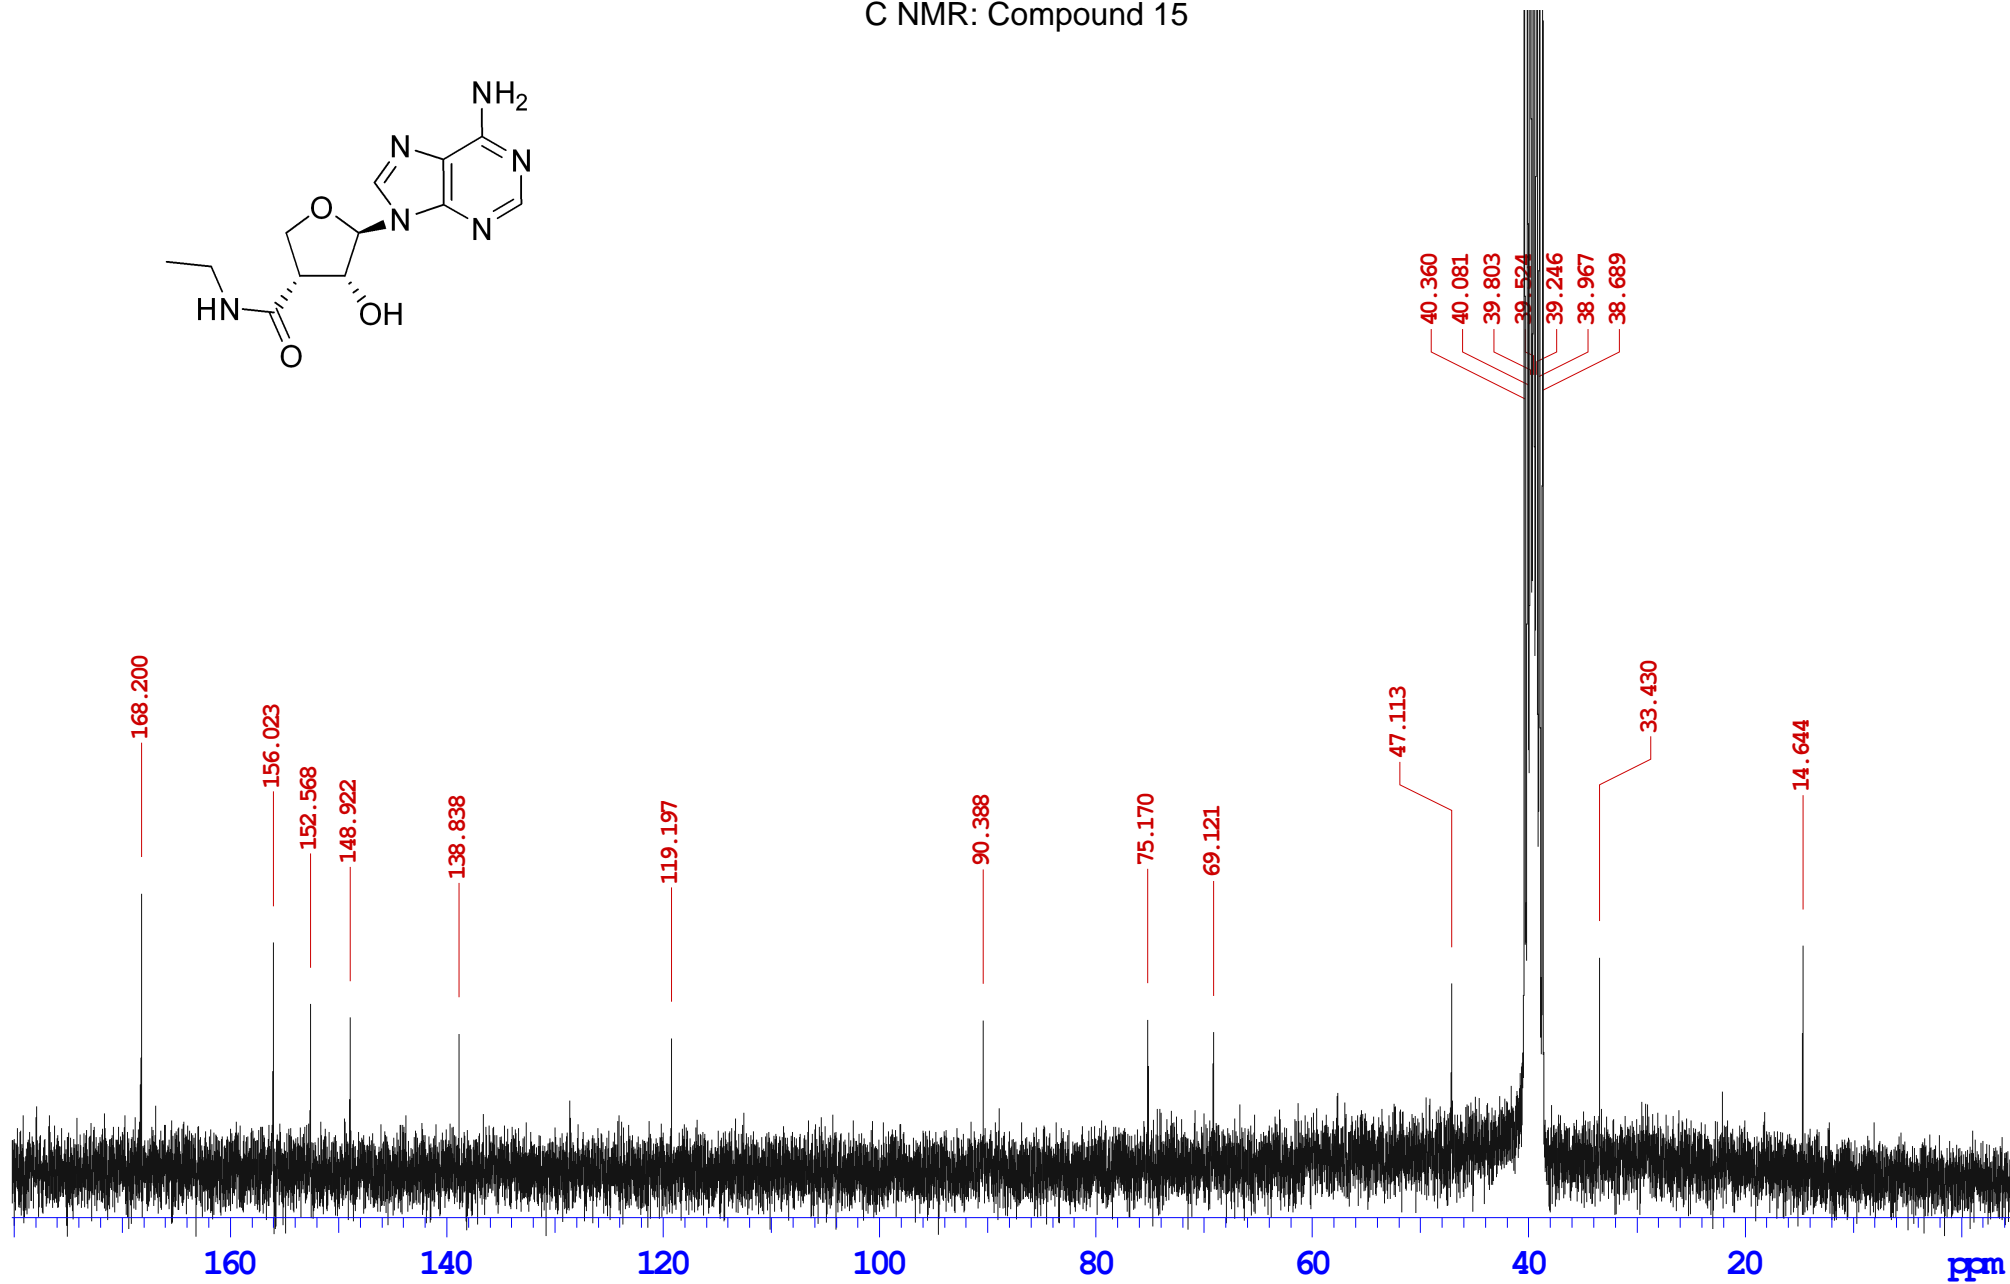

H NMR: Compound 16

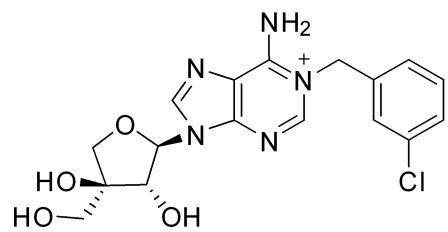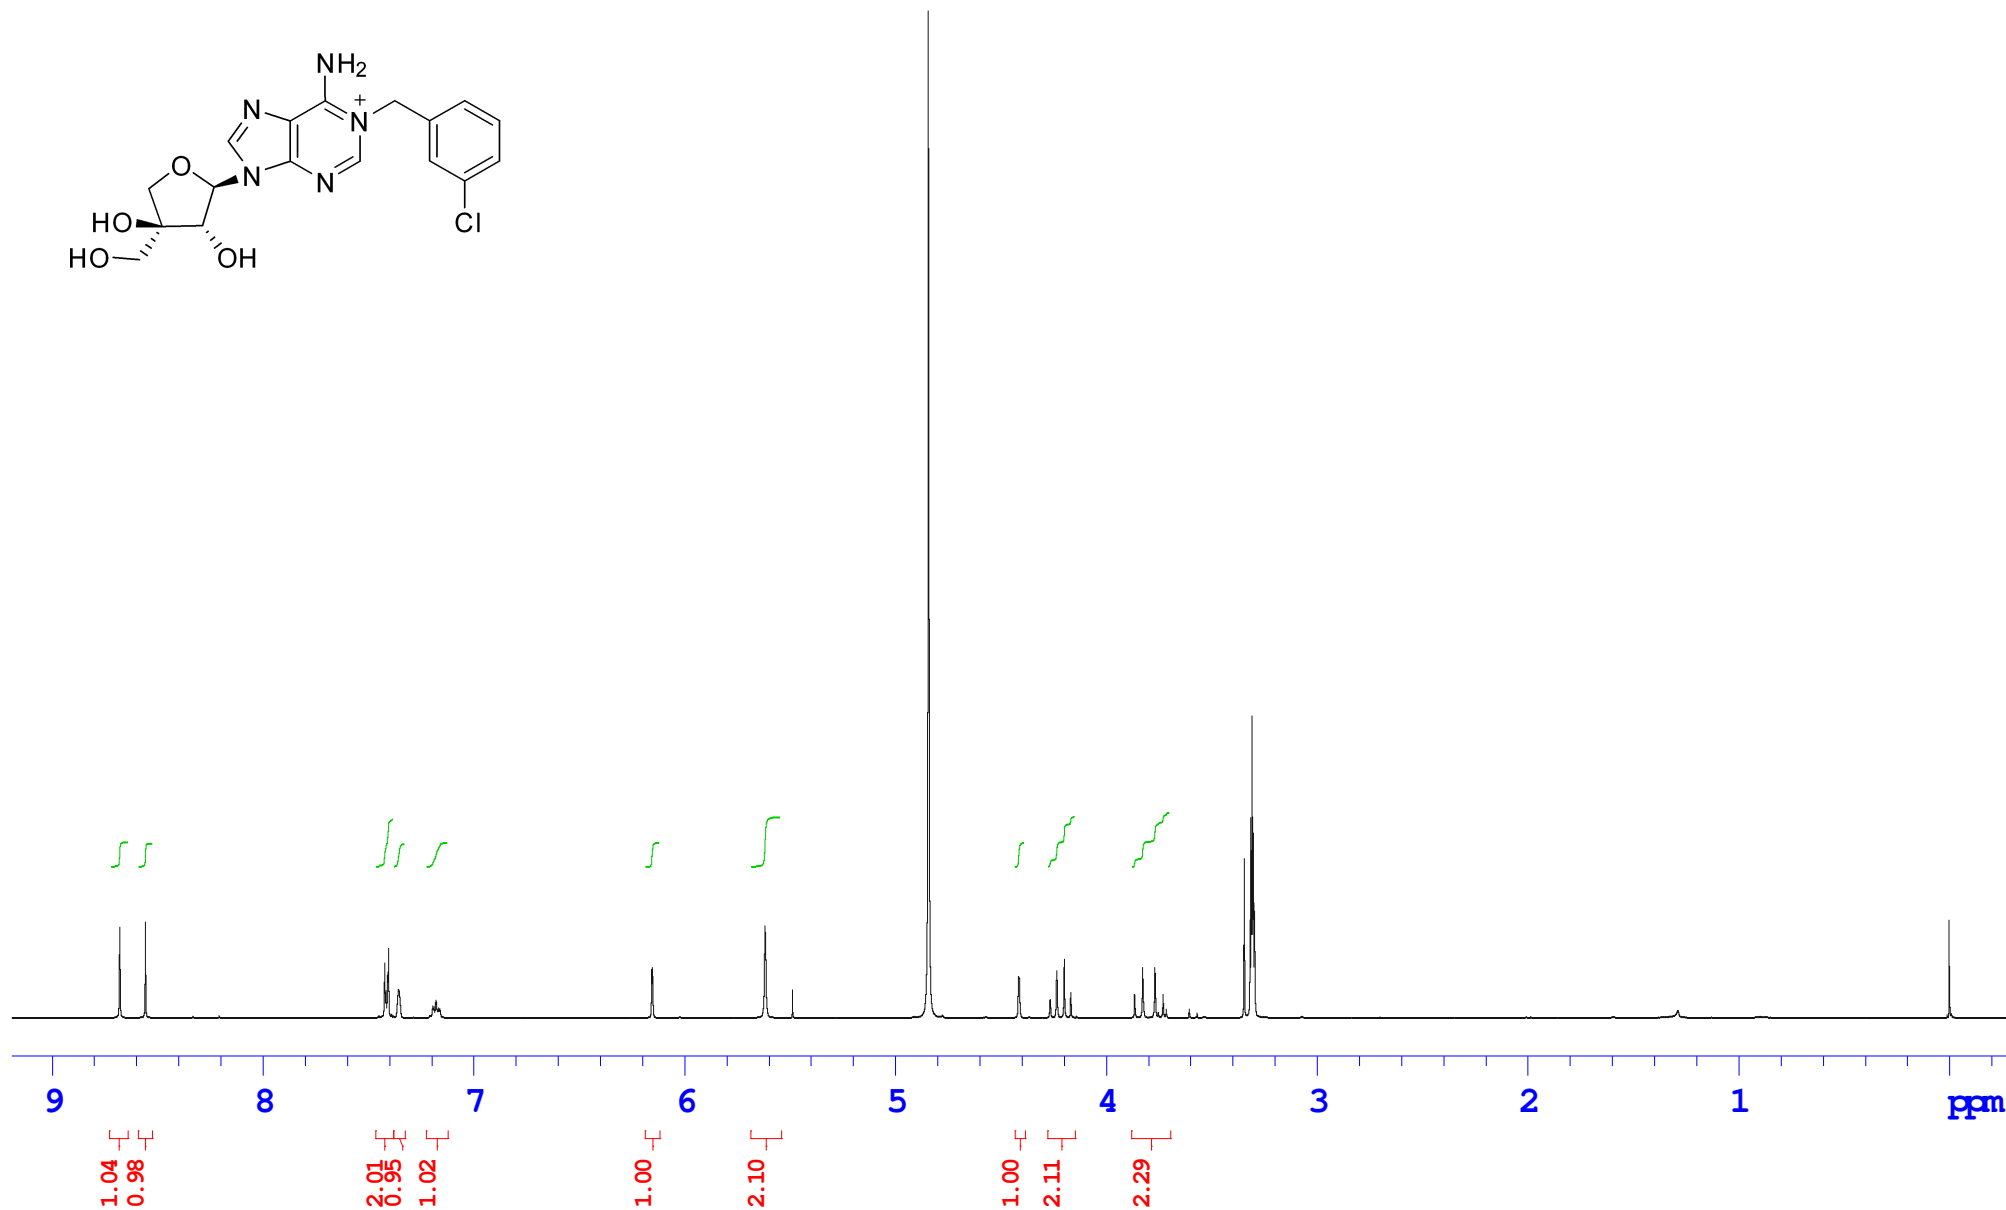

C NMR: Compound 16

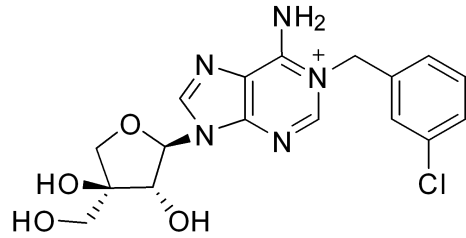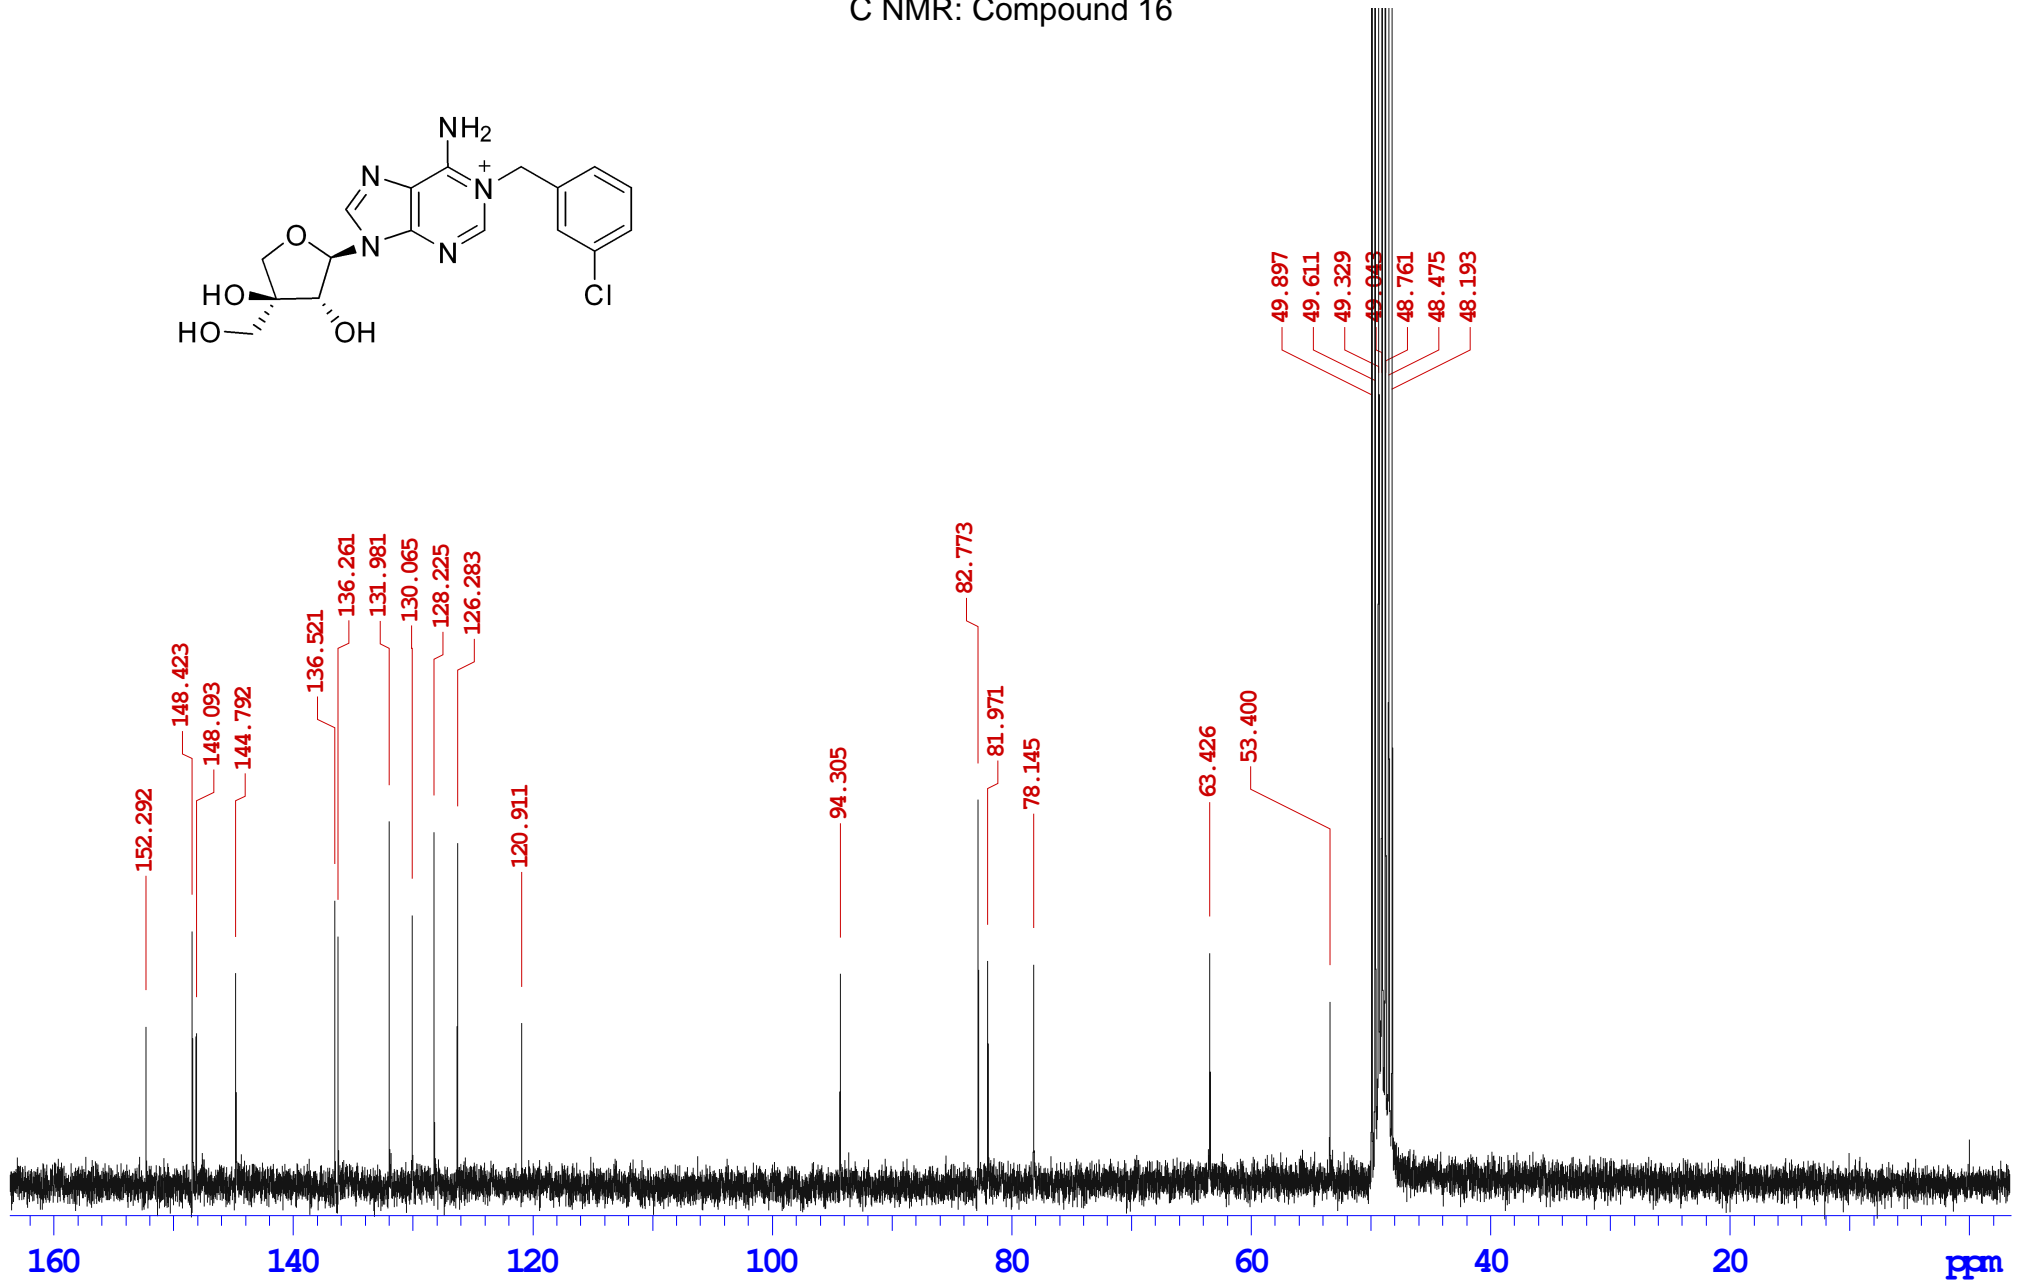



H NMR: Compound 17

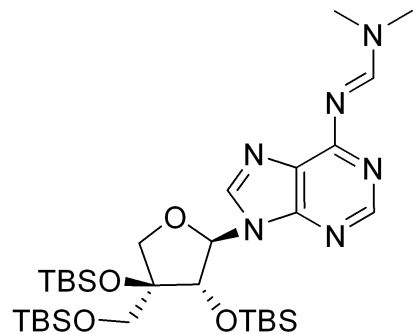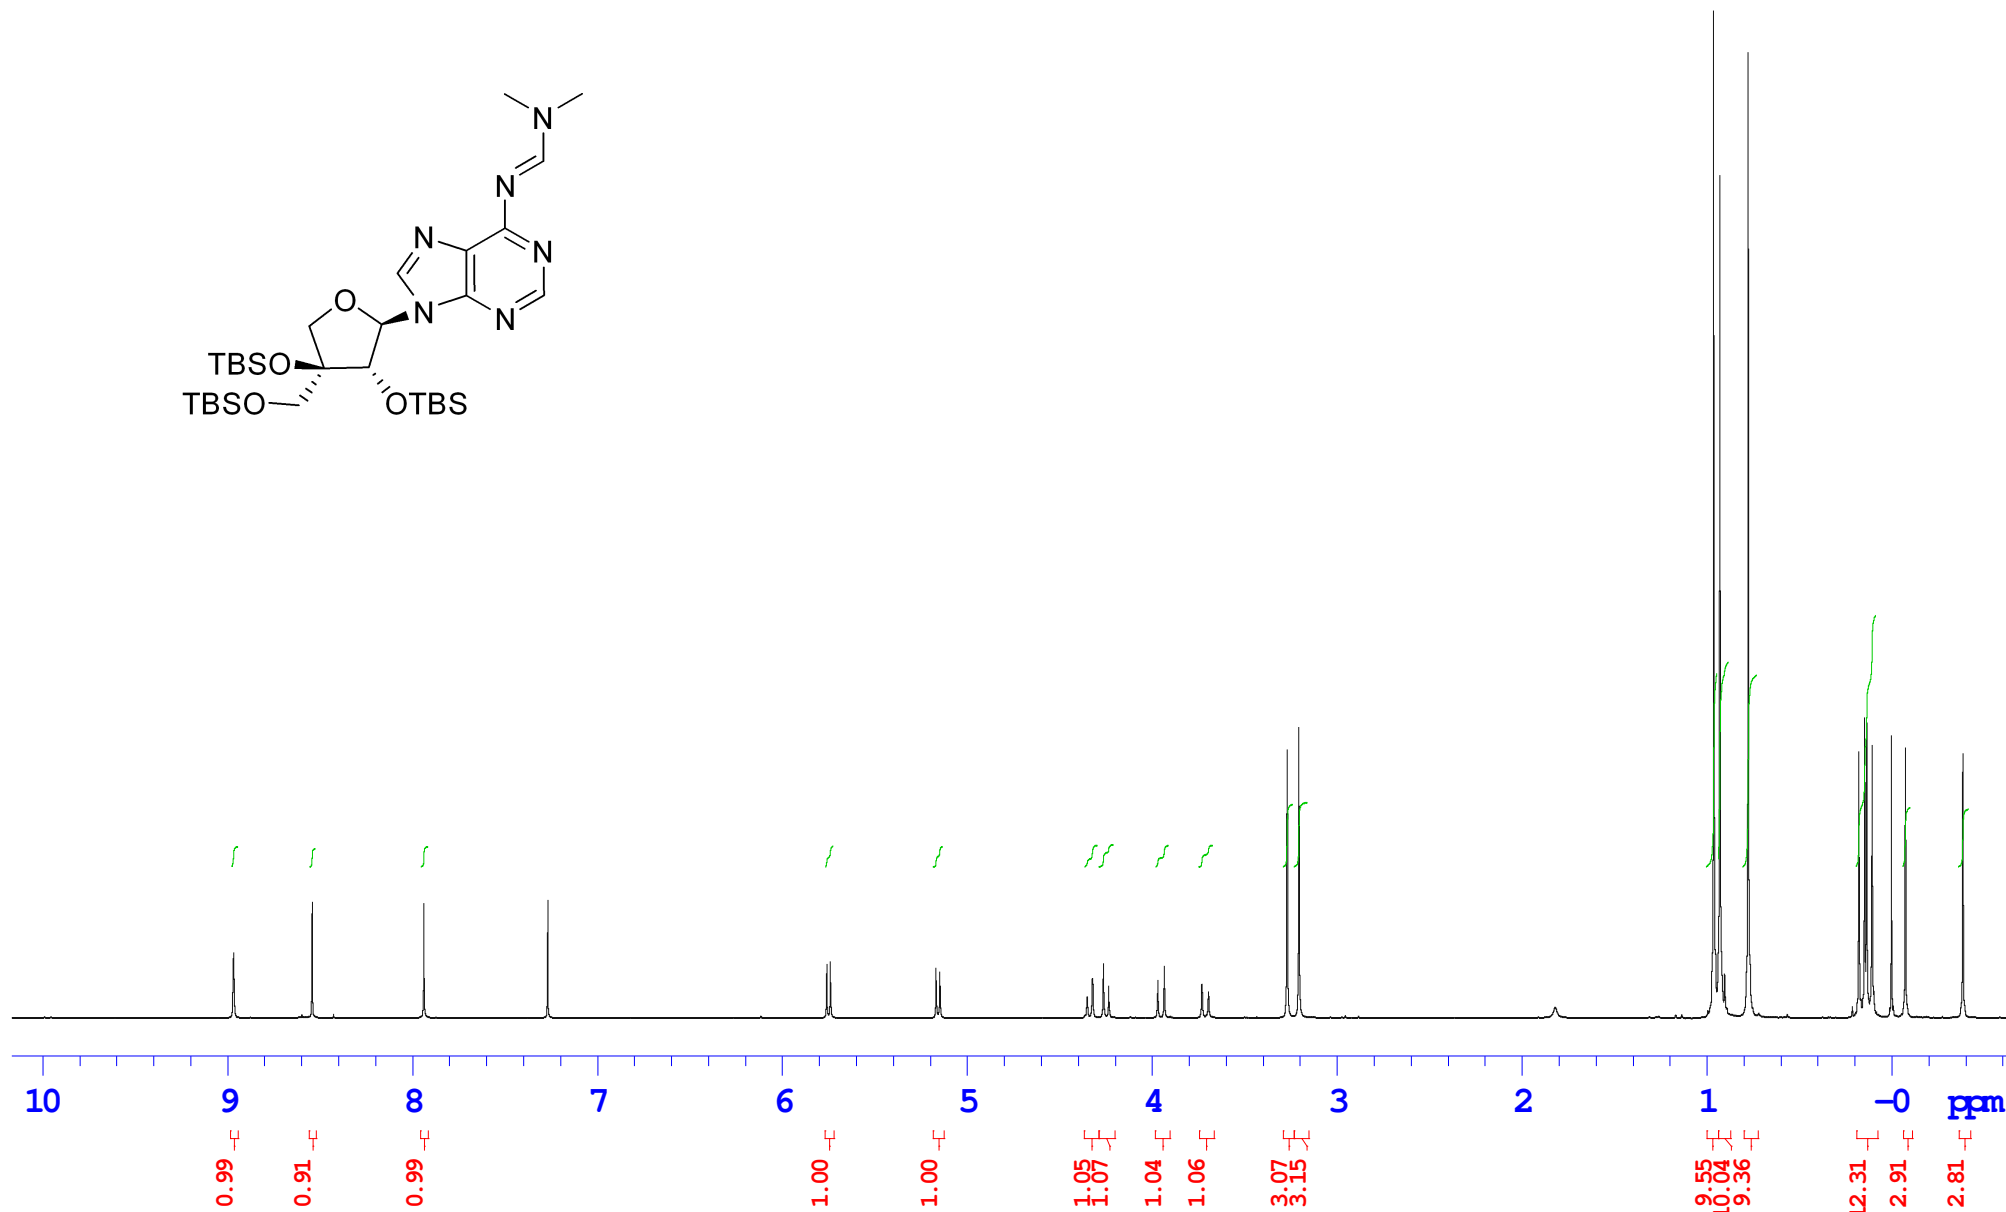

H NMR: Compound 18

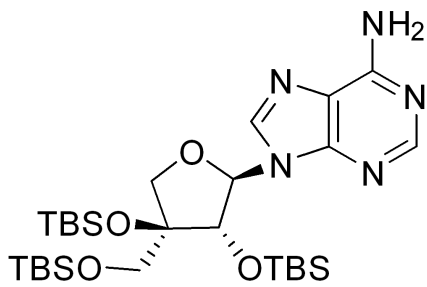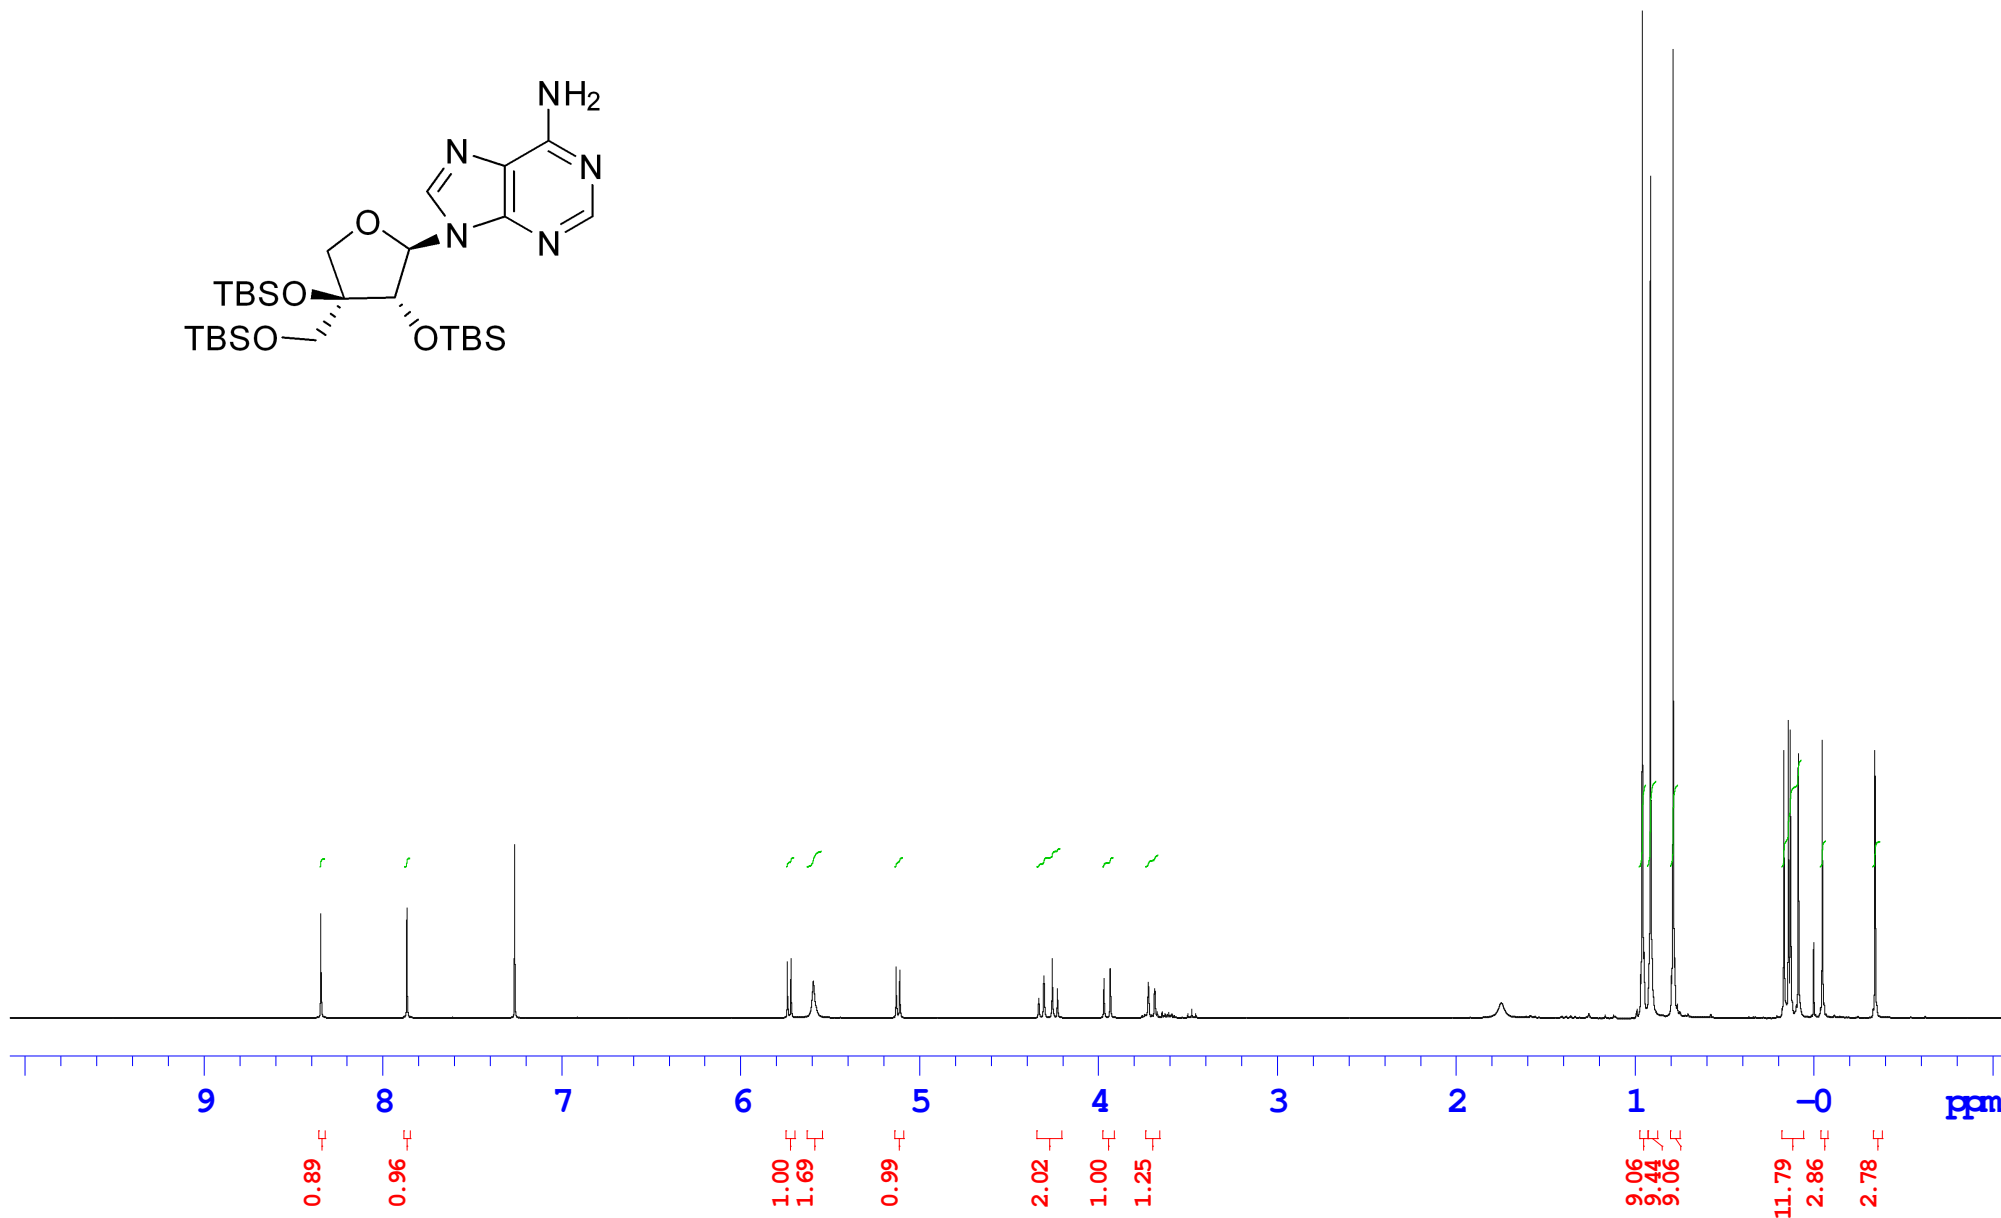

C NMR: Compound 18

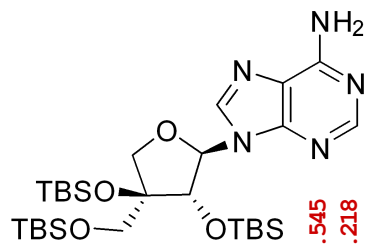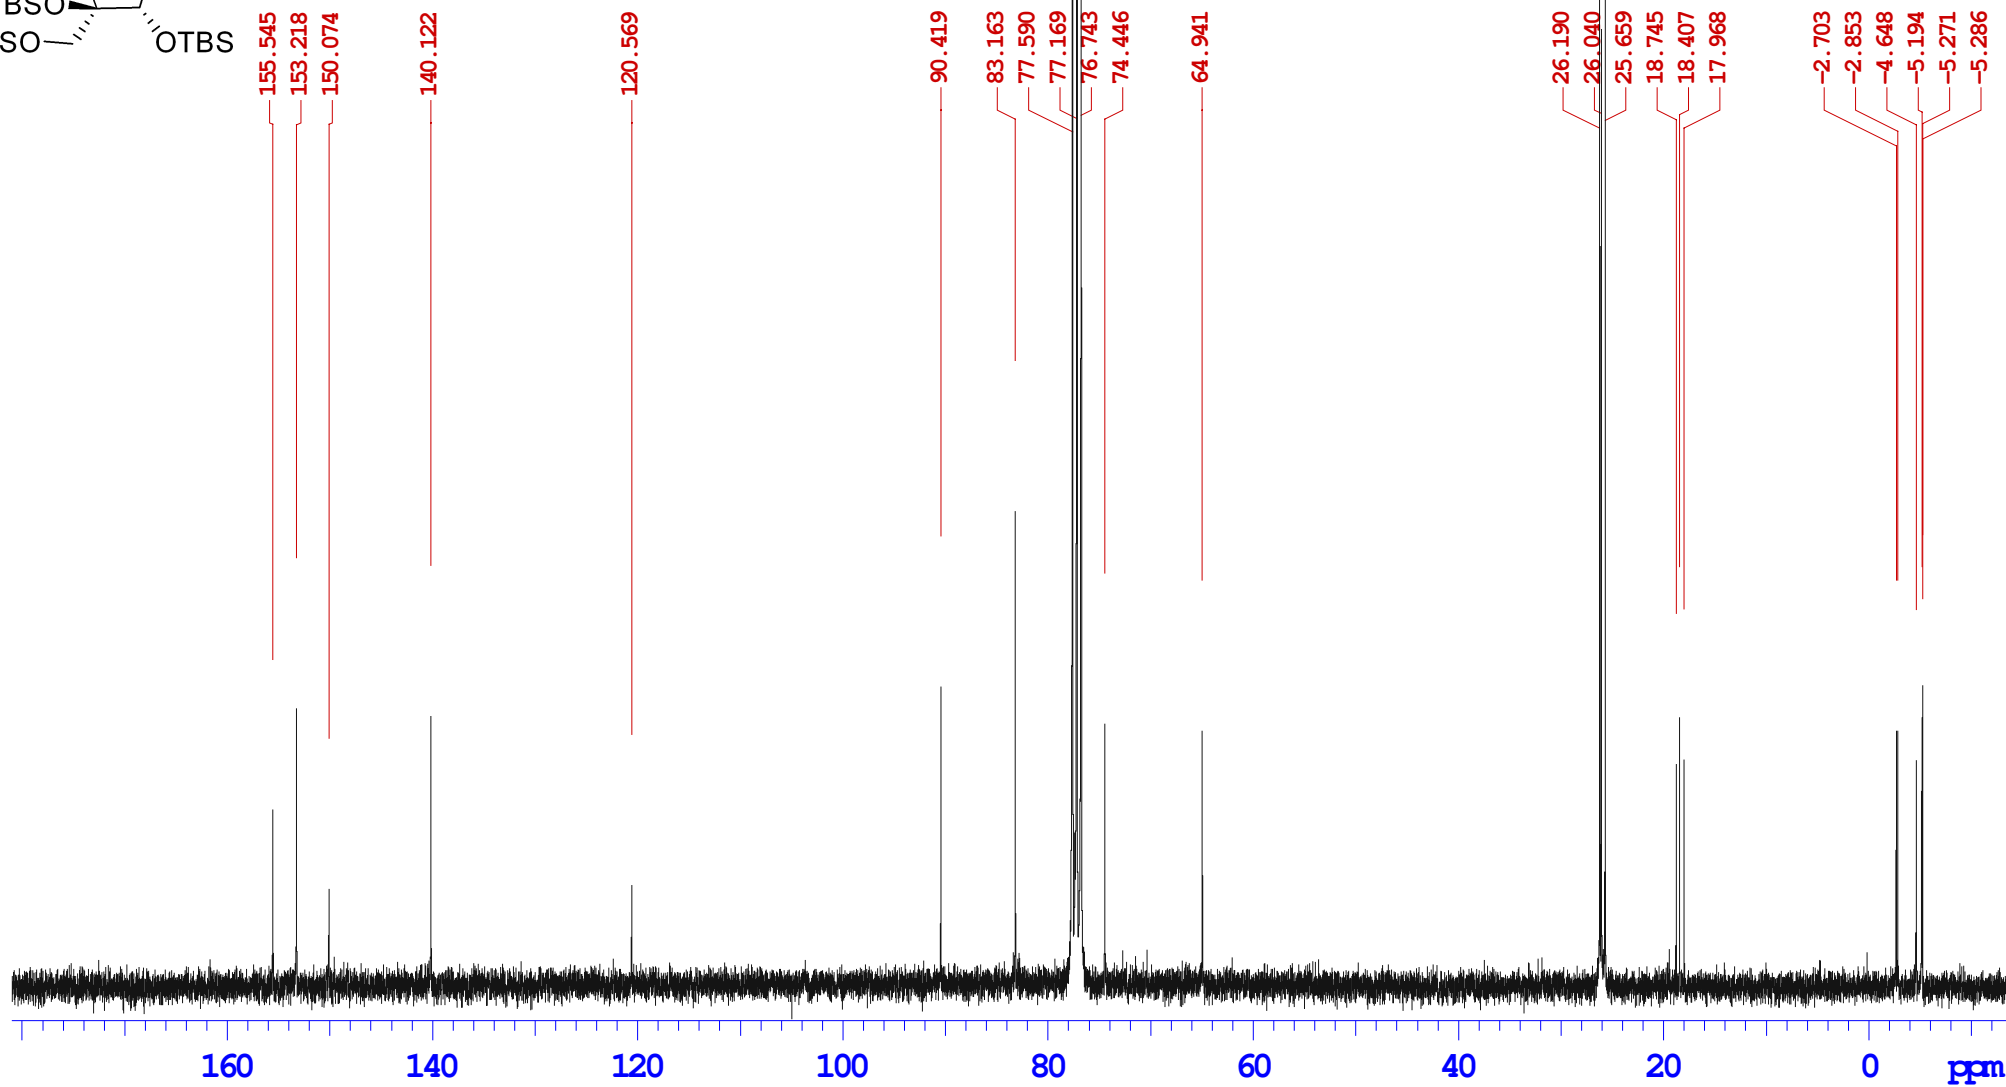

H NMR: Compound 19

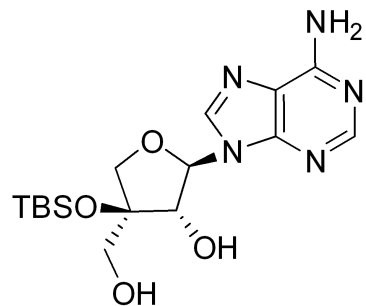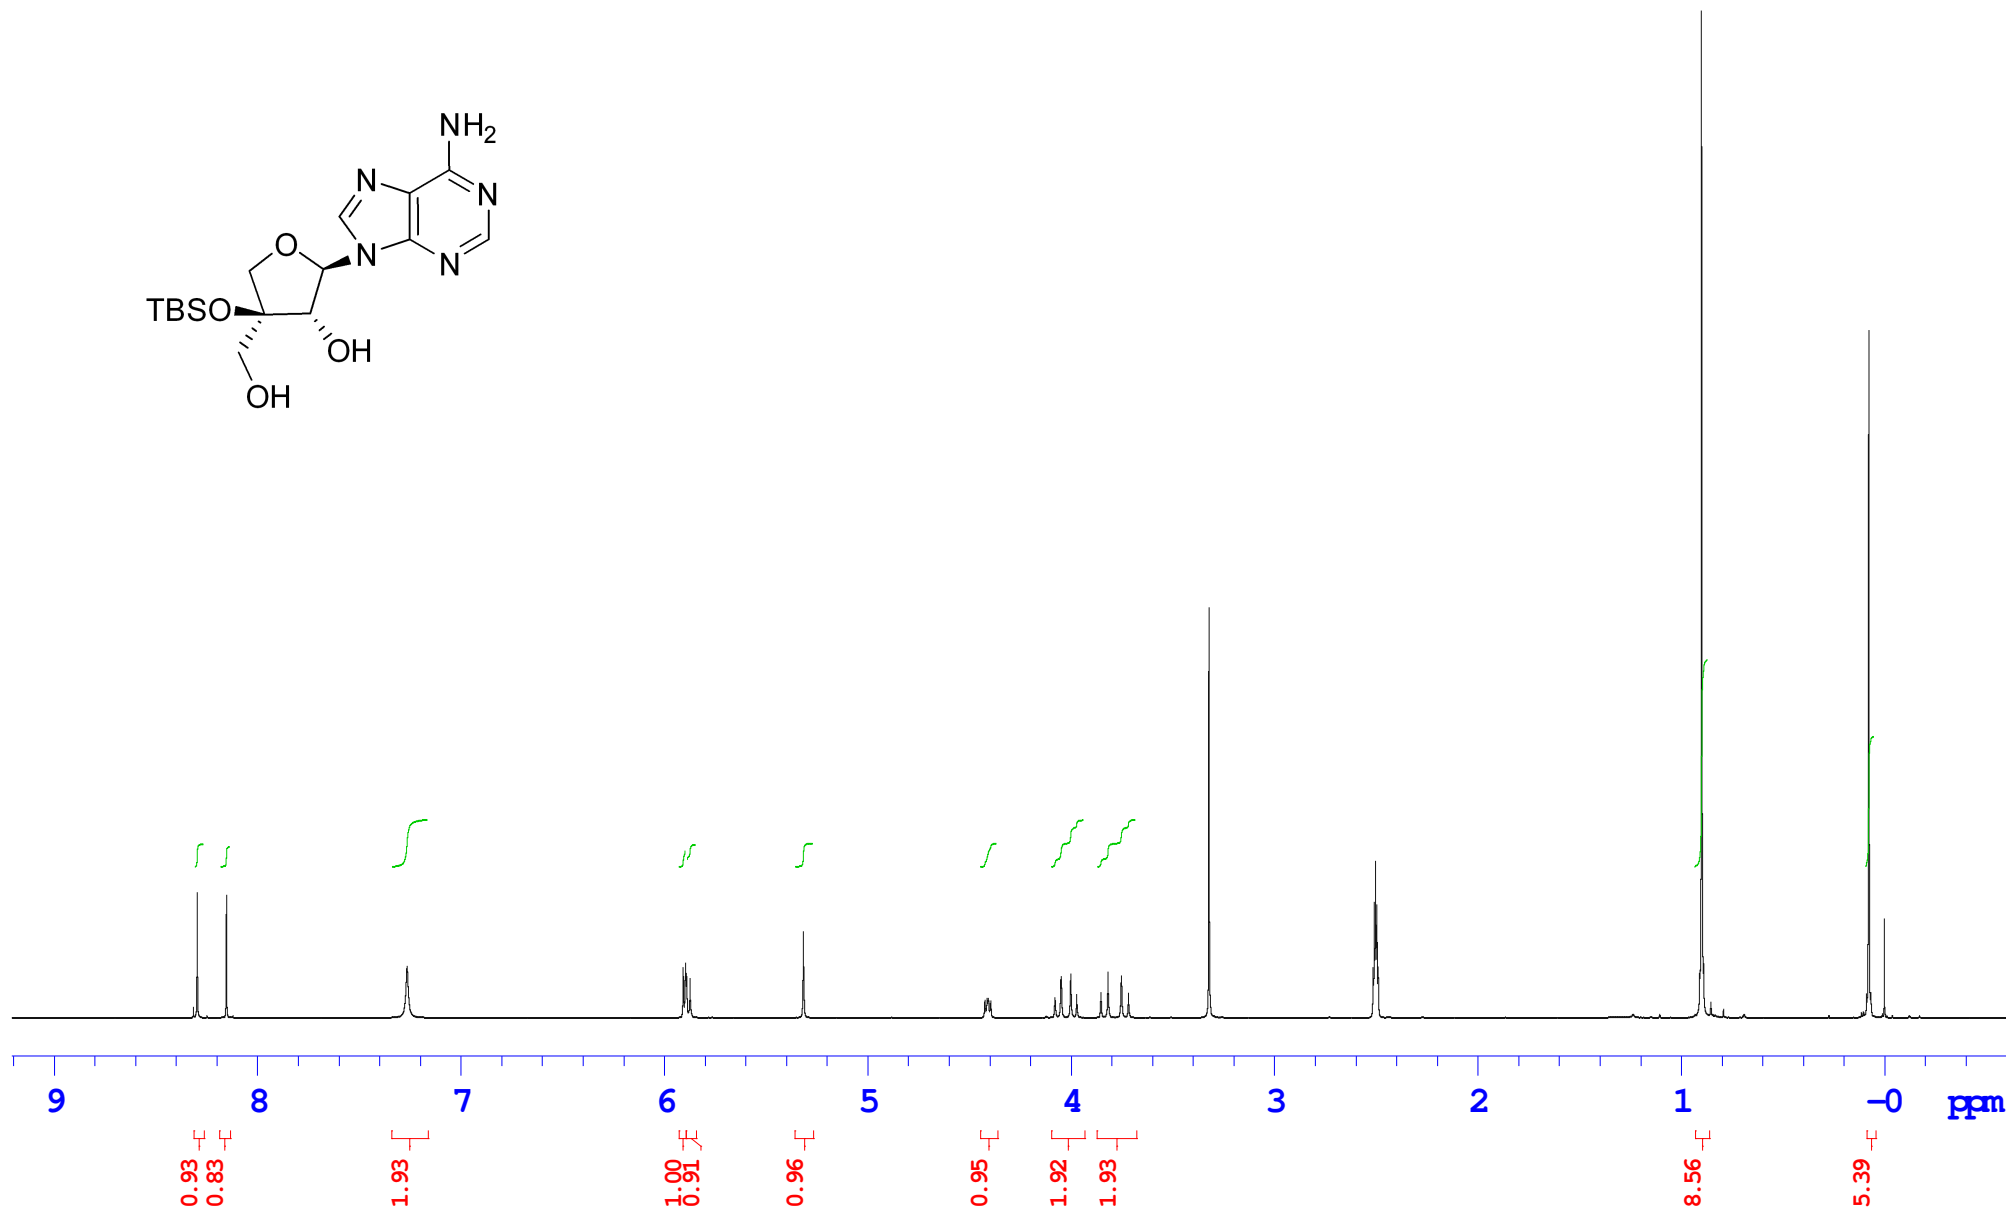

C NMR: Compound 19

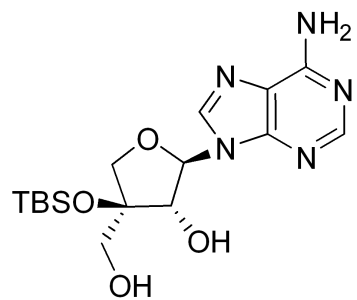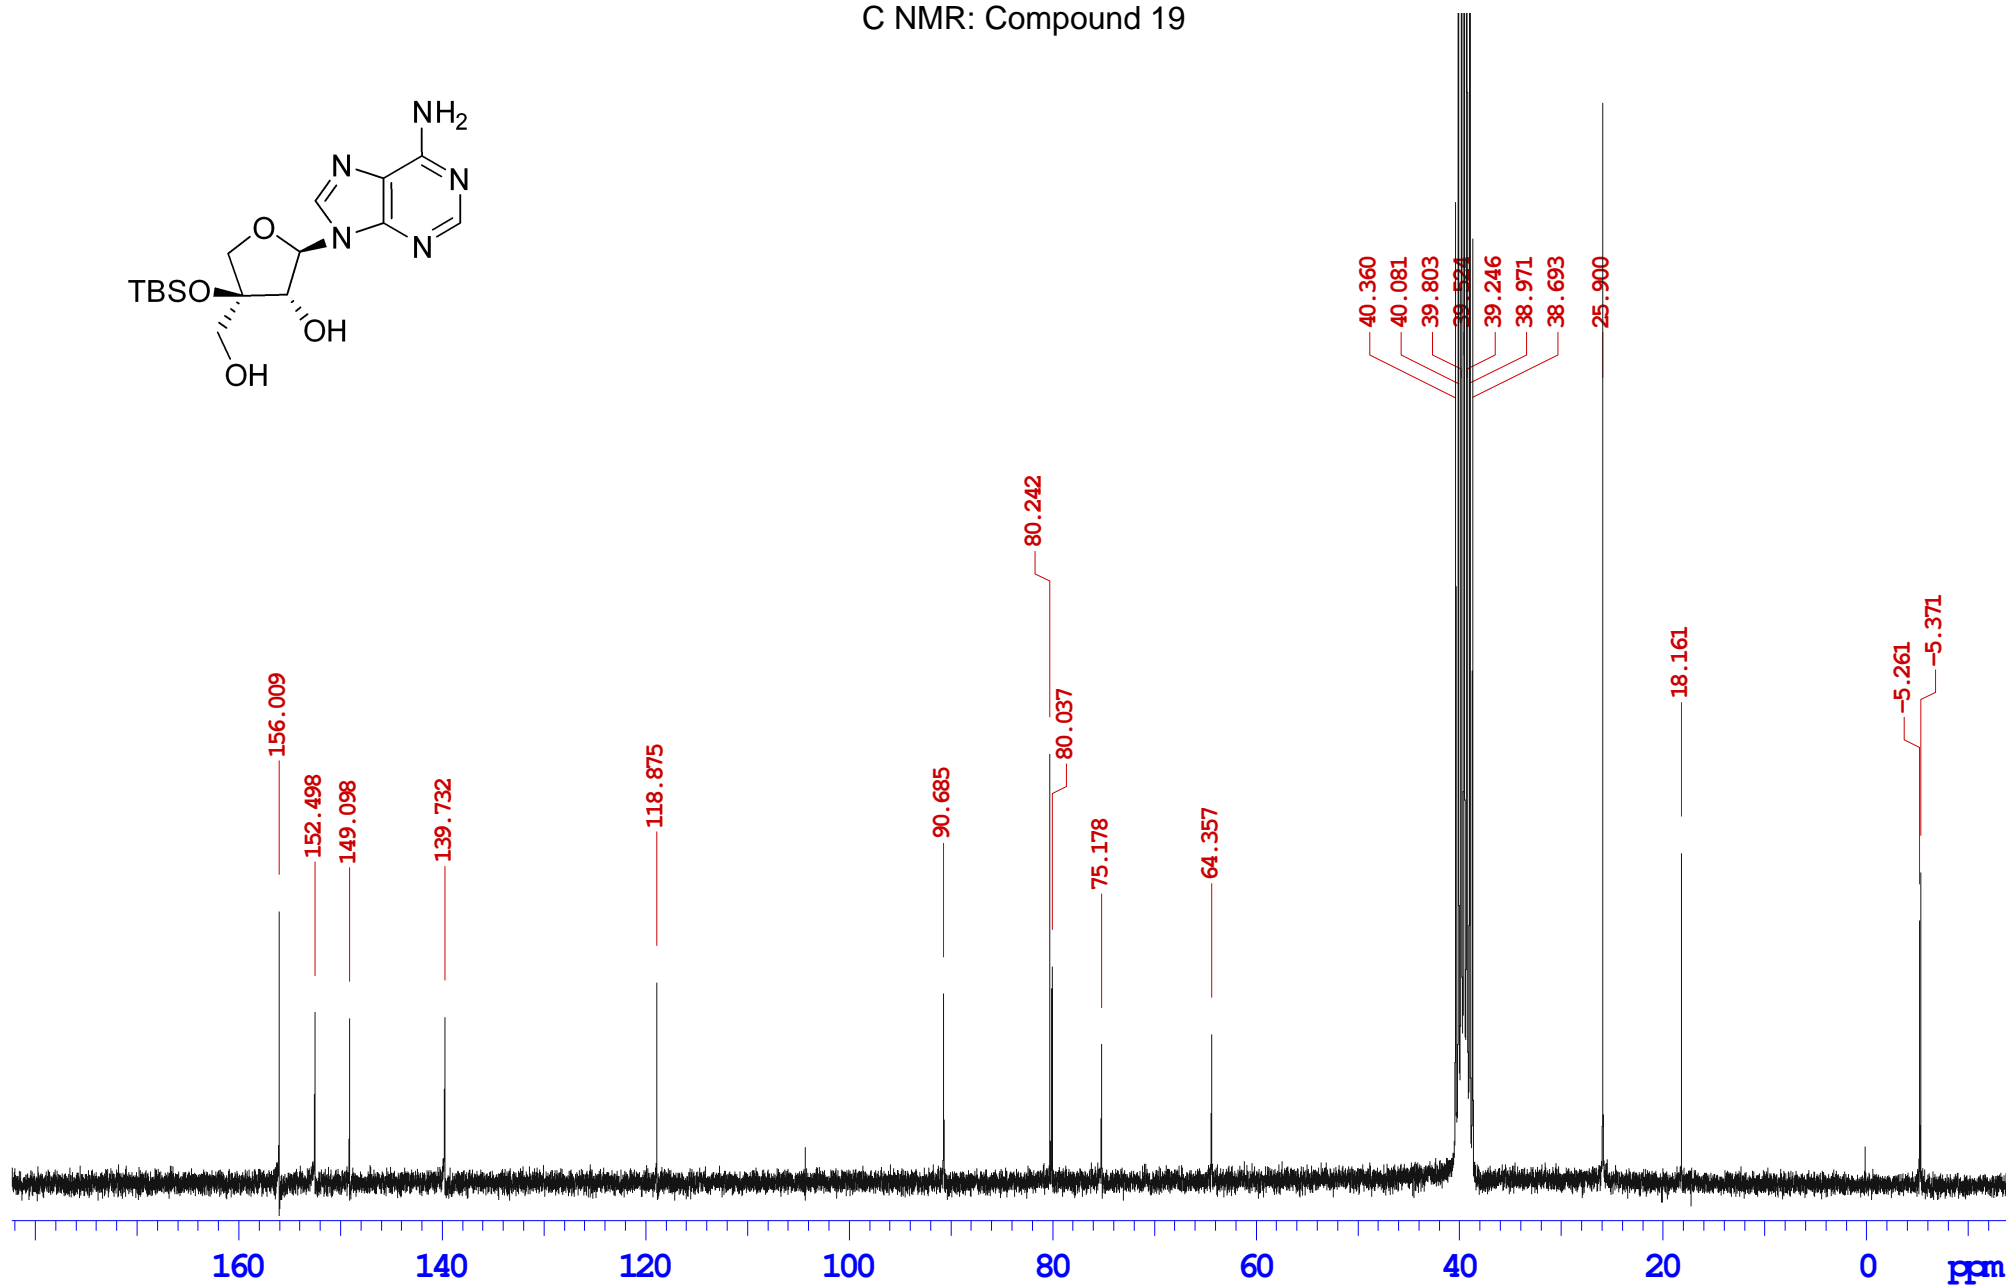

H NMR: Compound 20 + 21

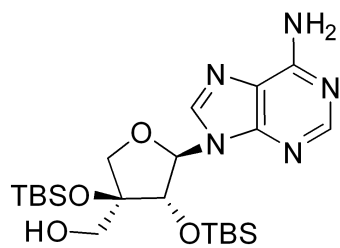

+

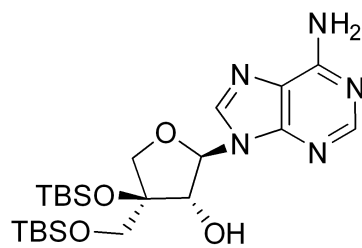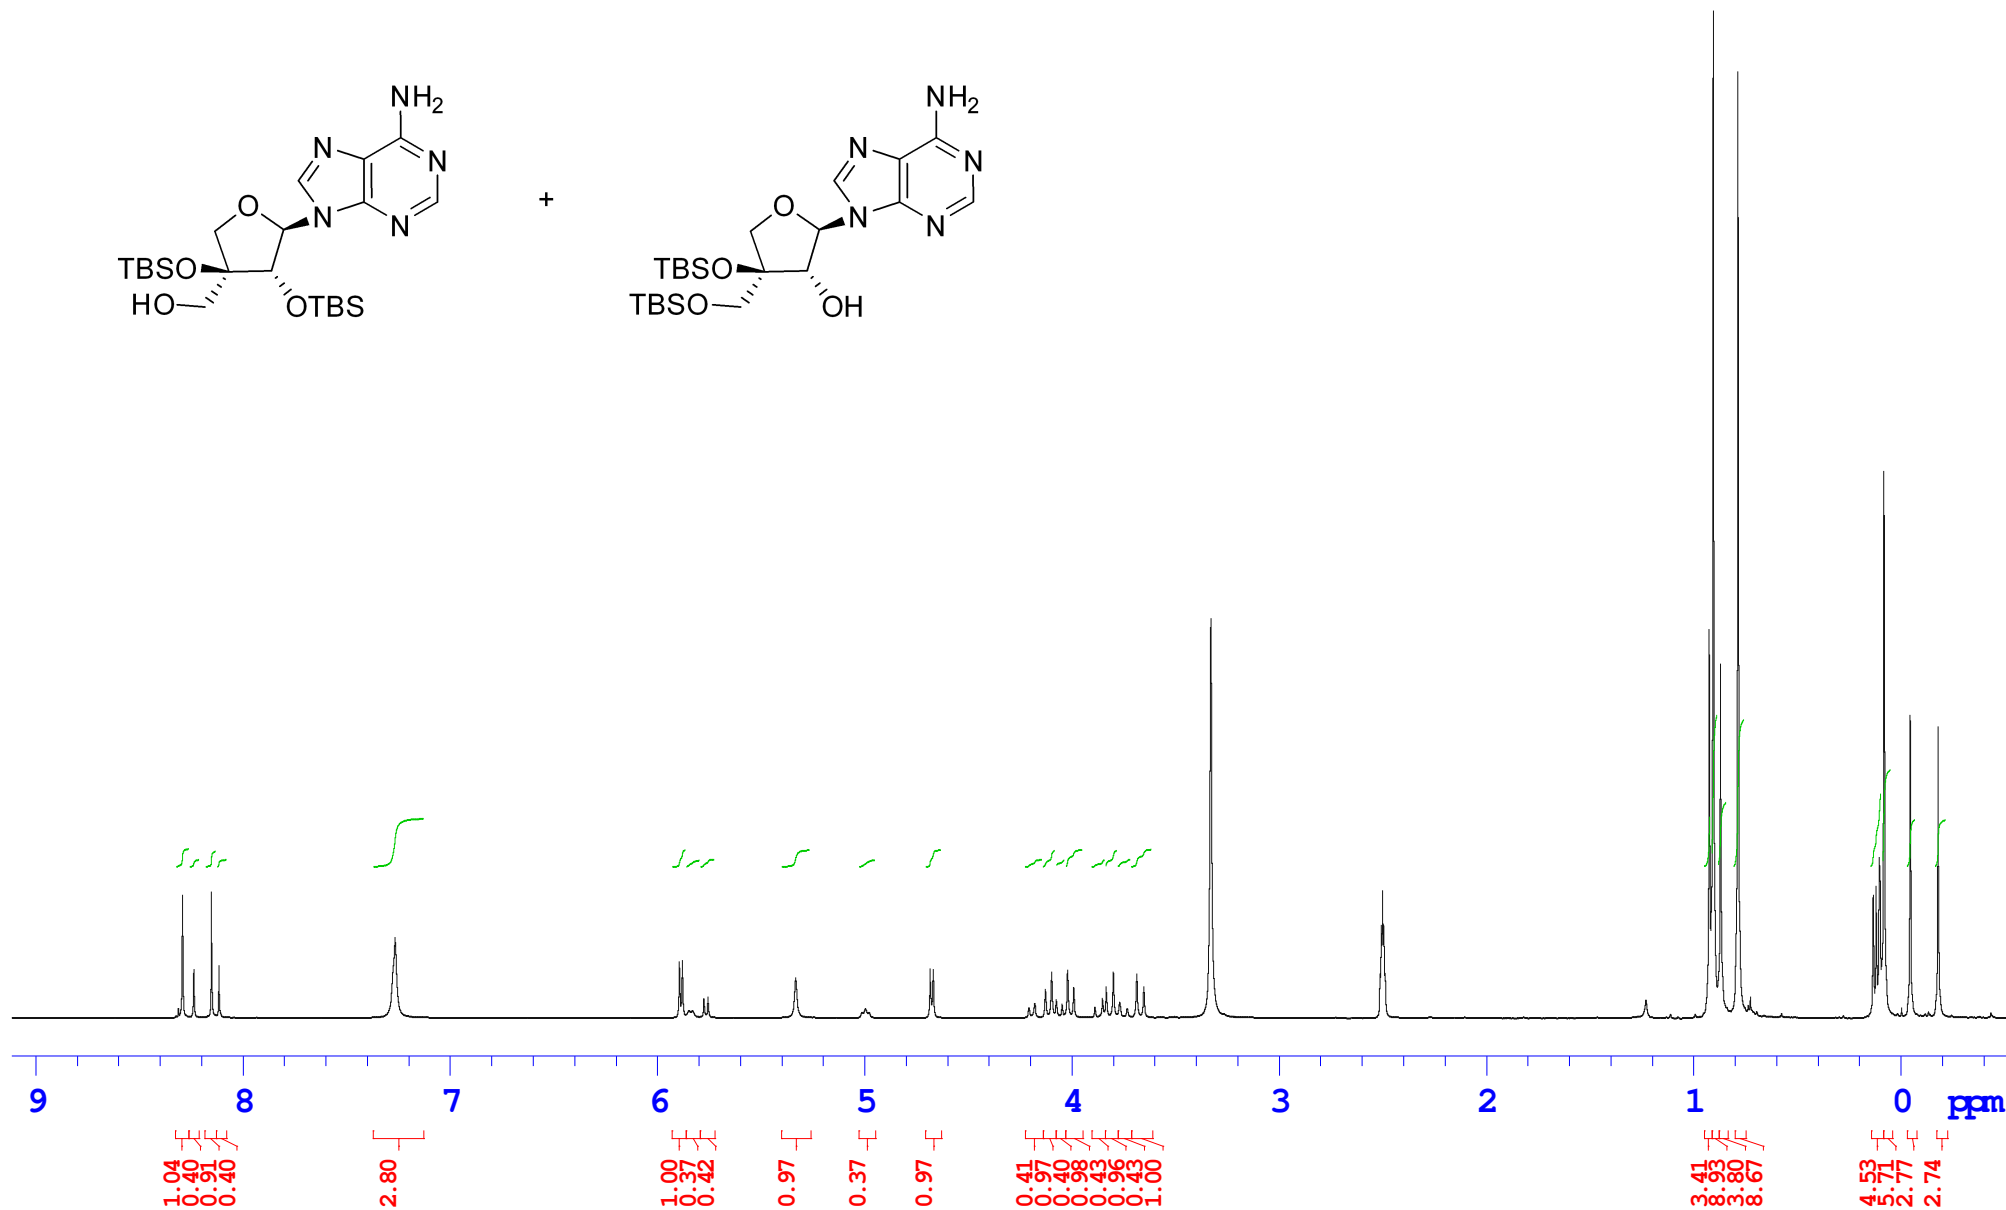

H NMR: Compound 22

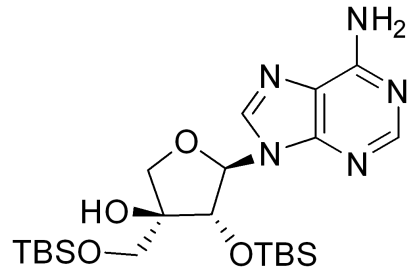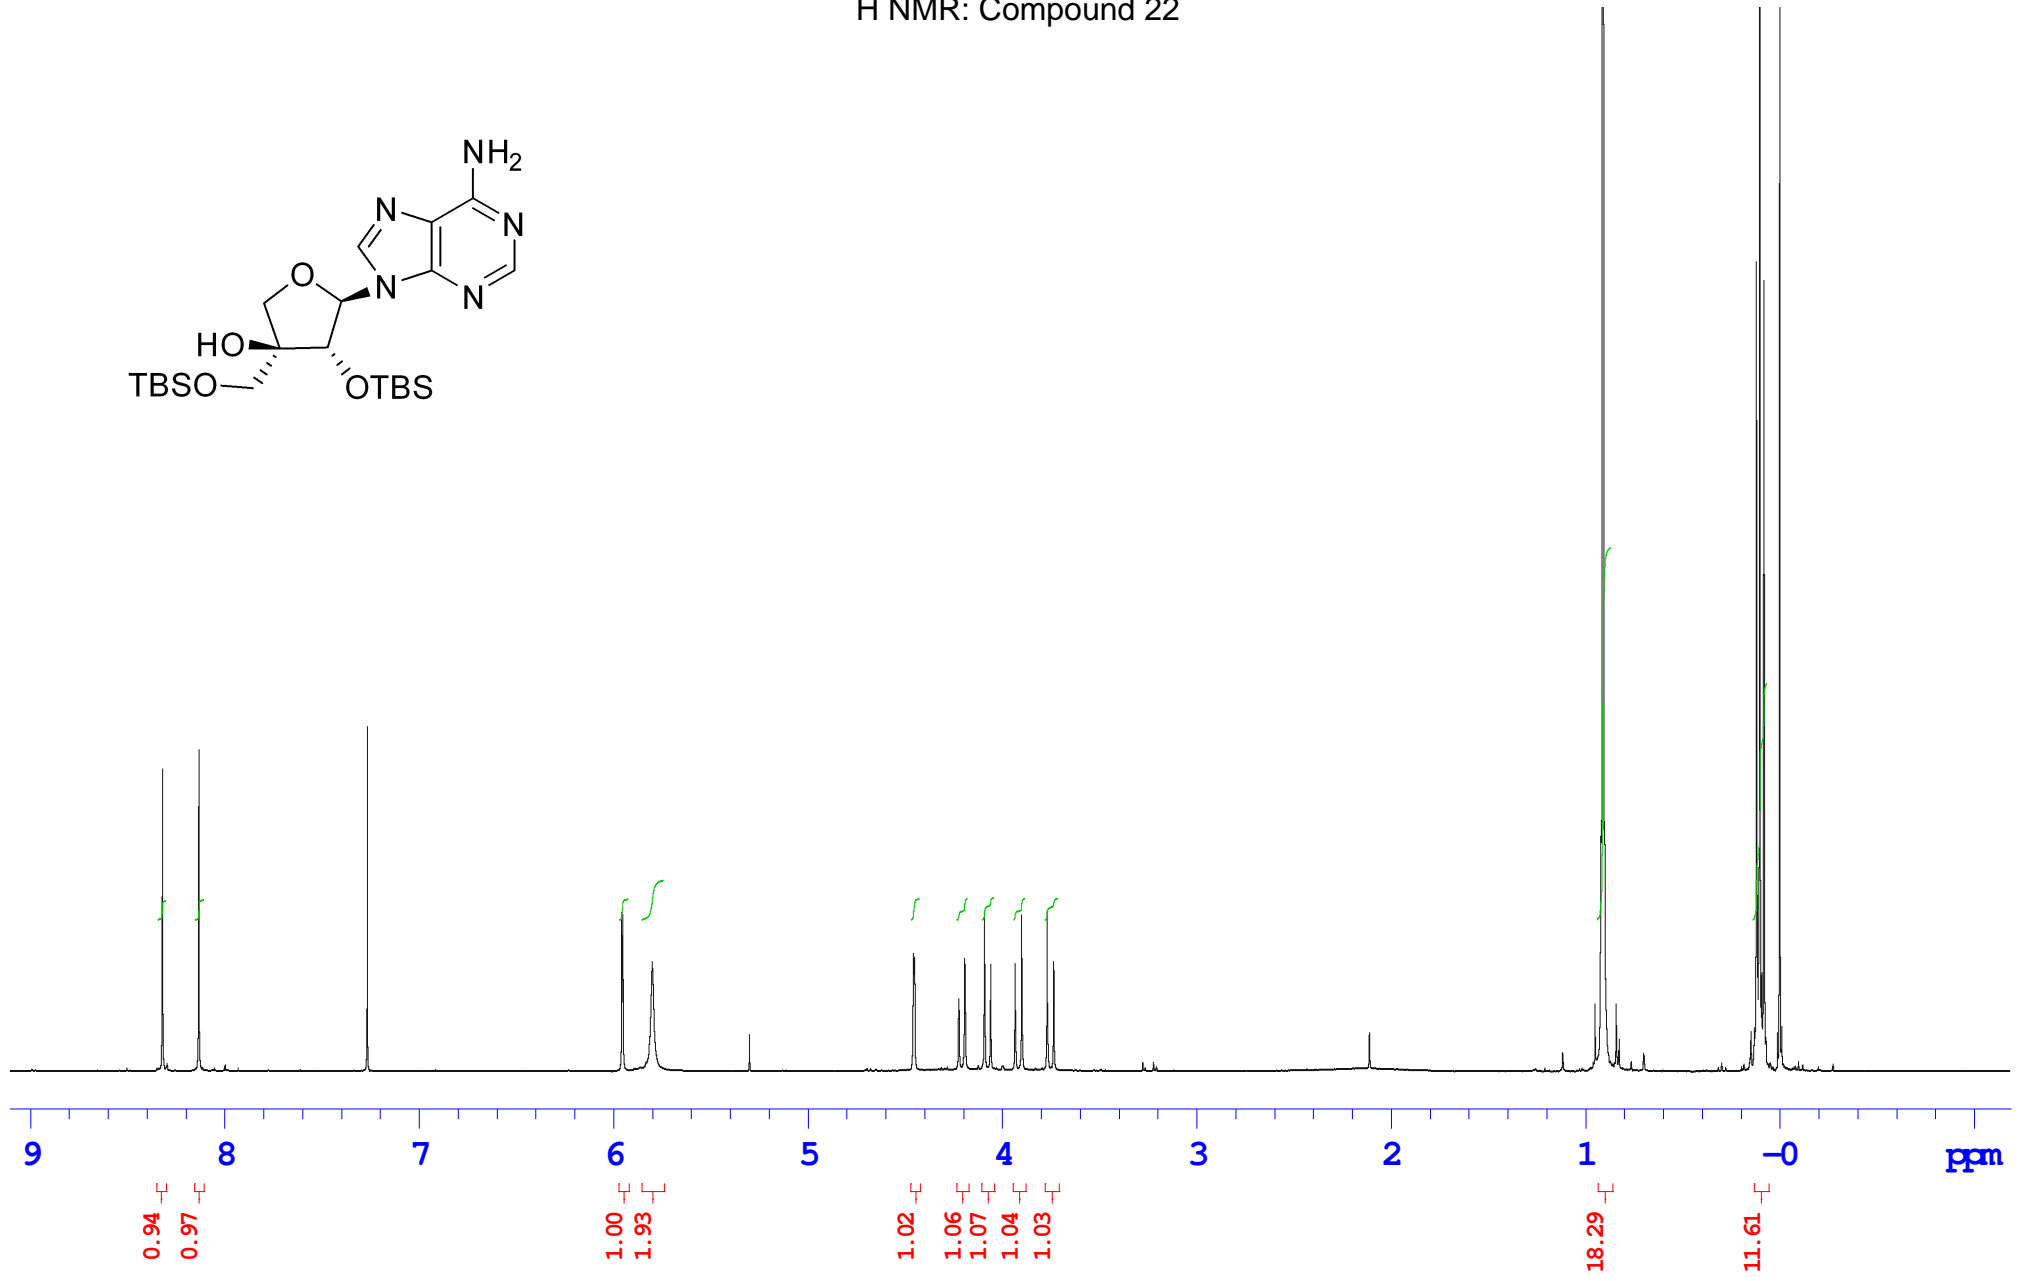

C NMR: Compound 22

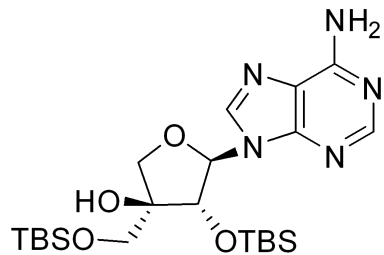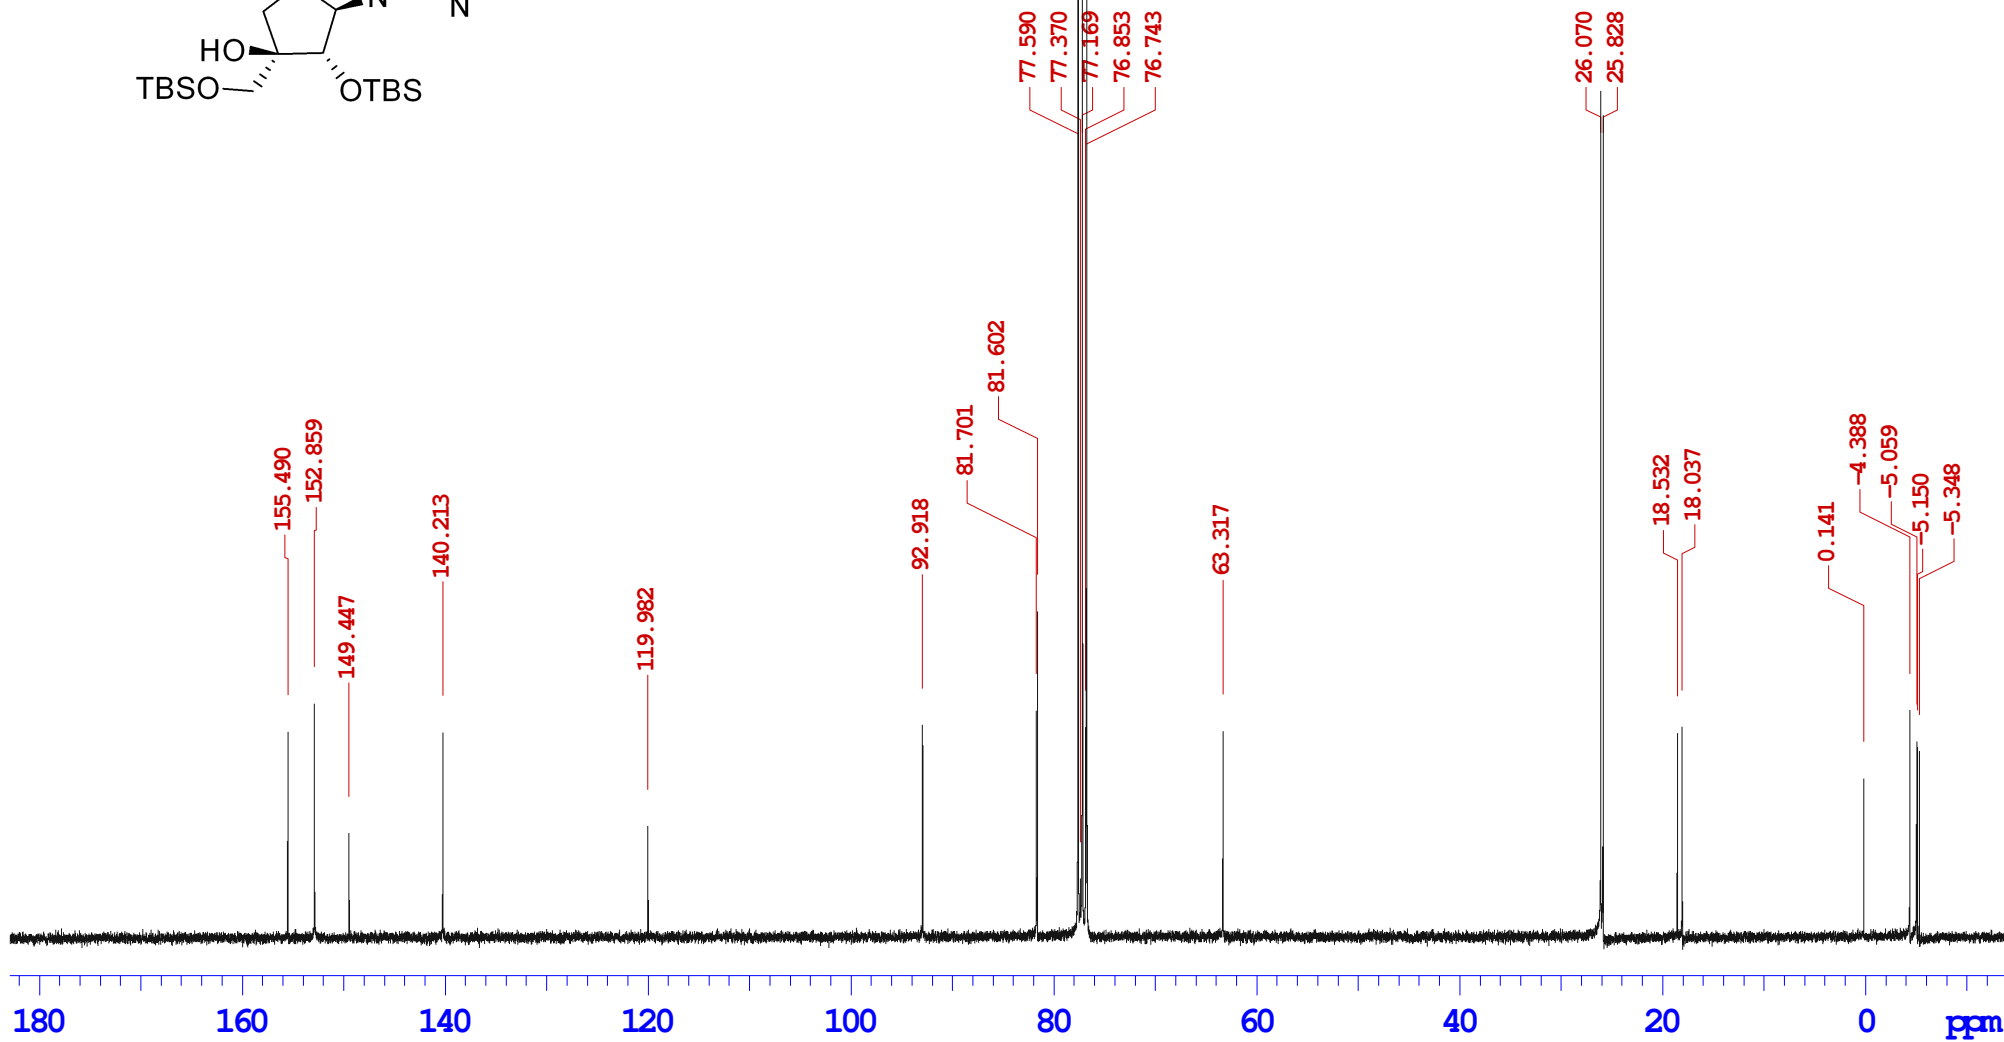



H NMR: Compound 23

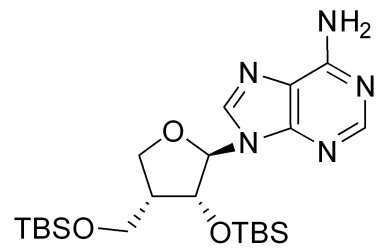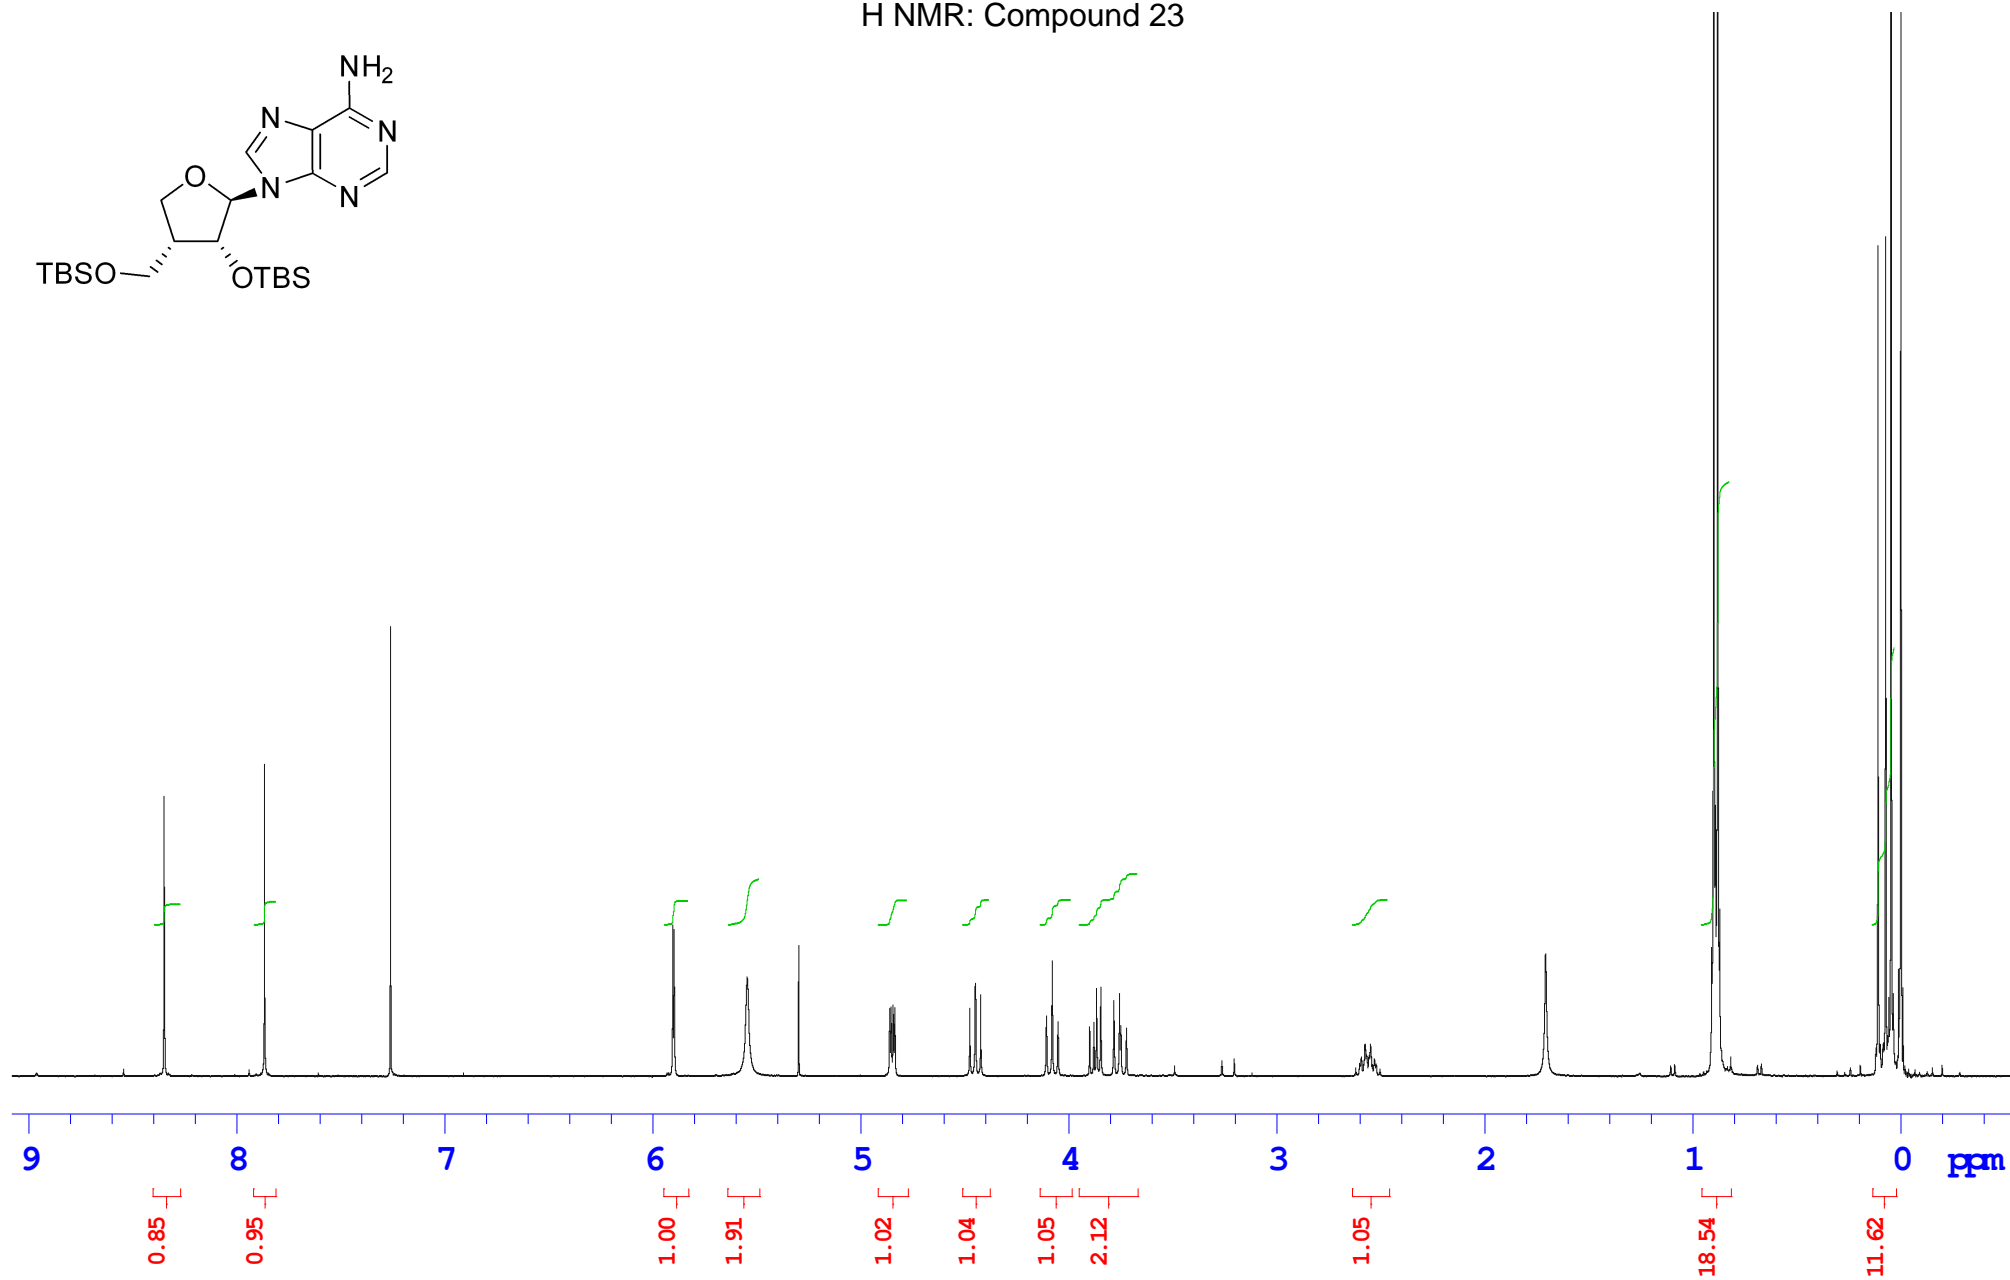

C NMR: Compound 23

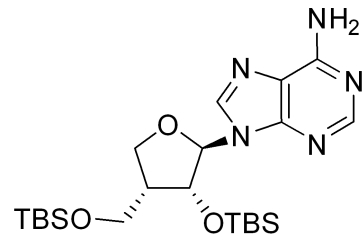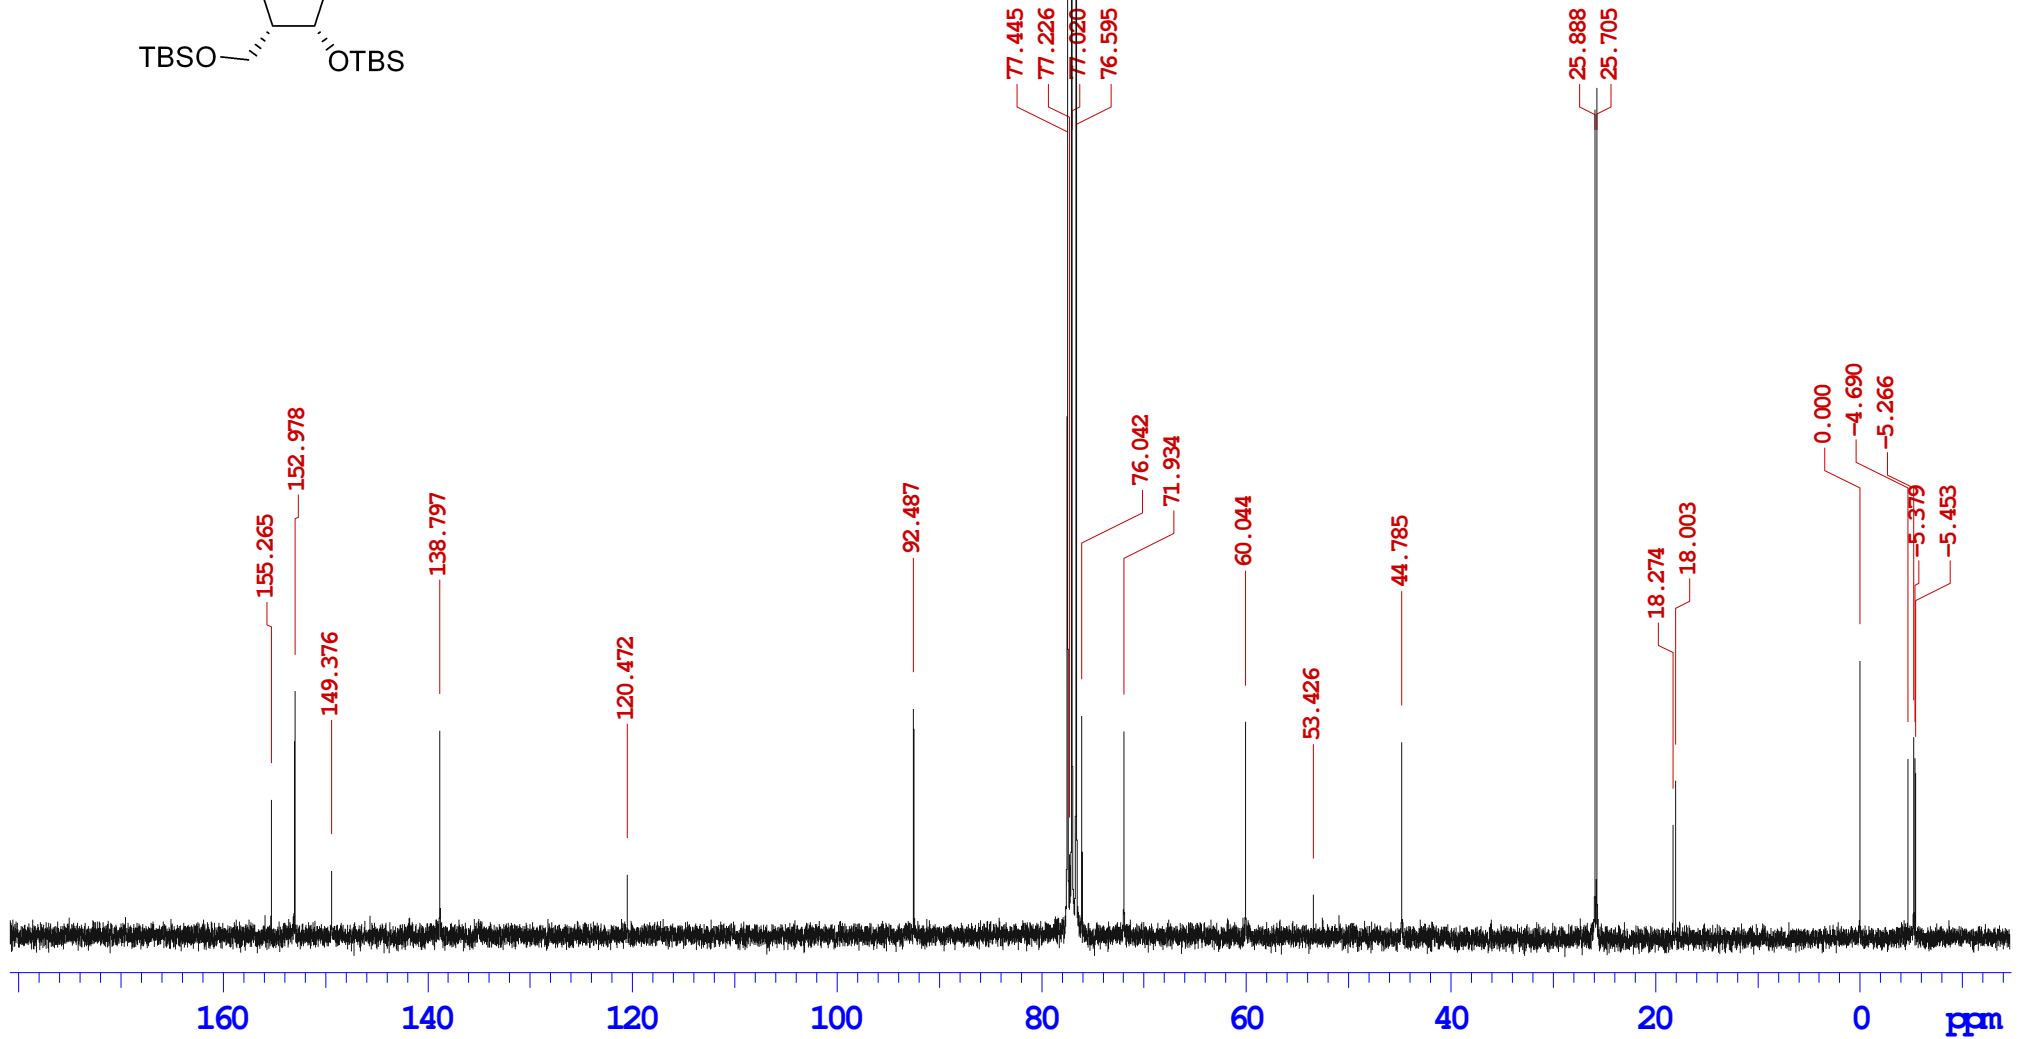

H NMR: Compound 24

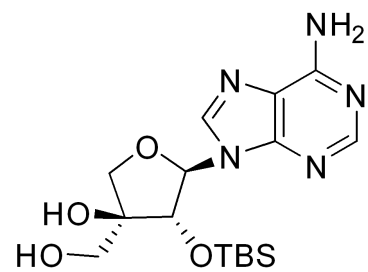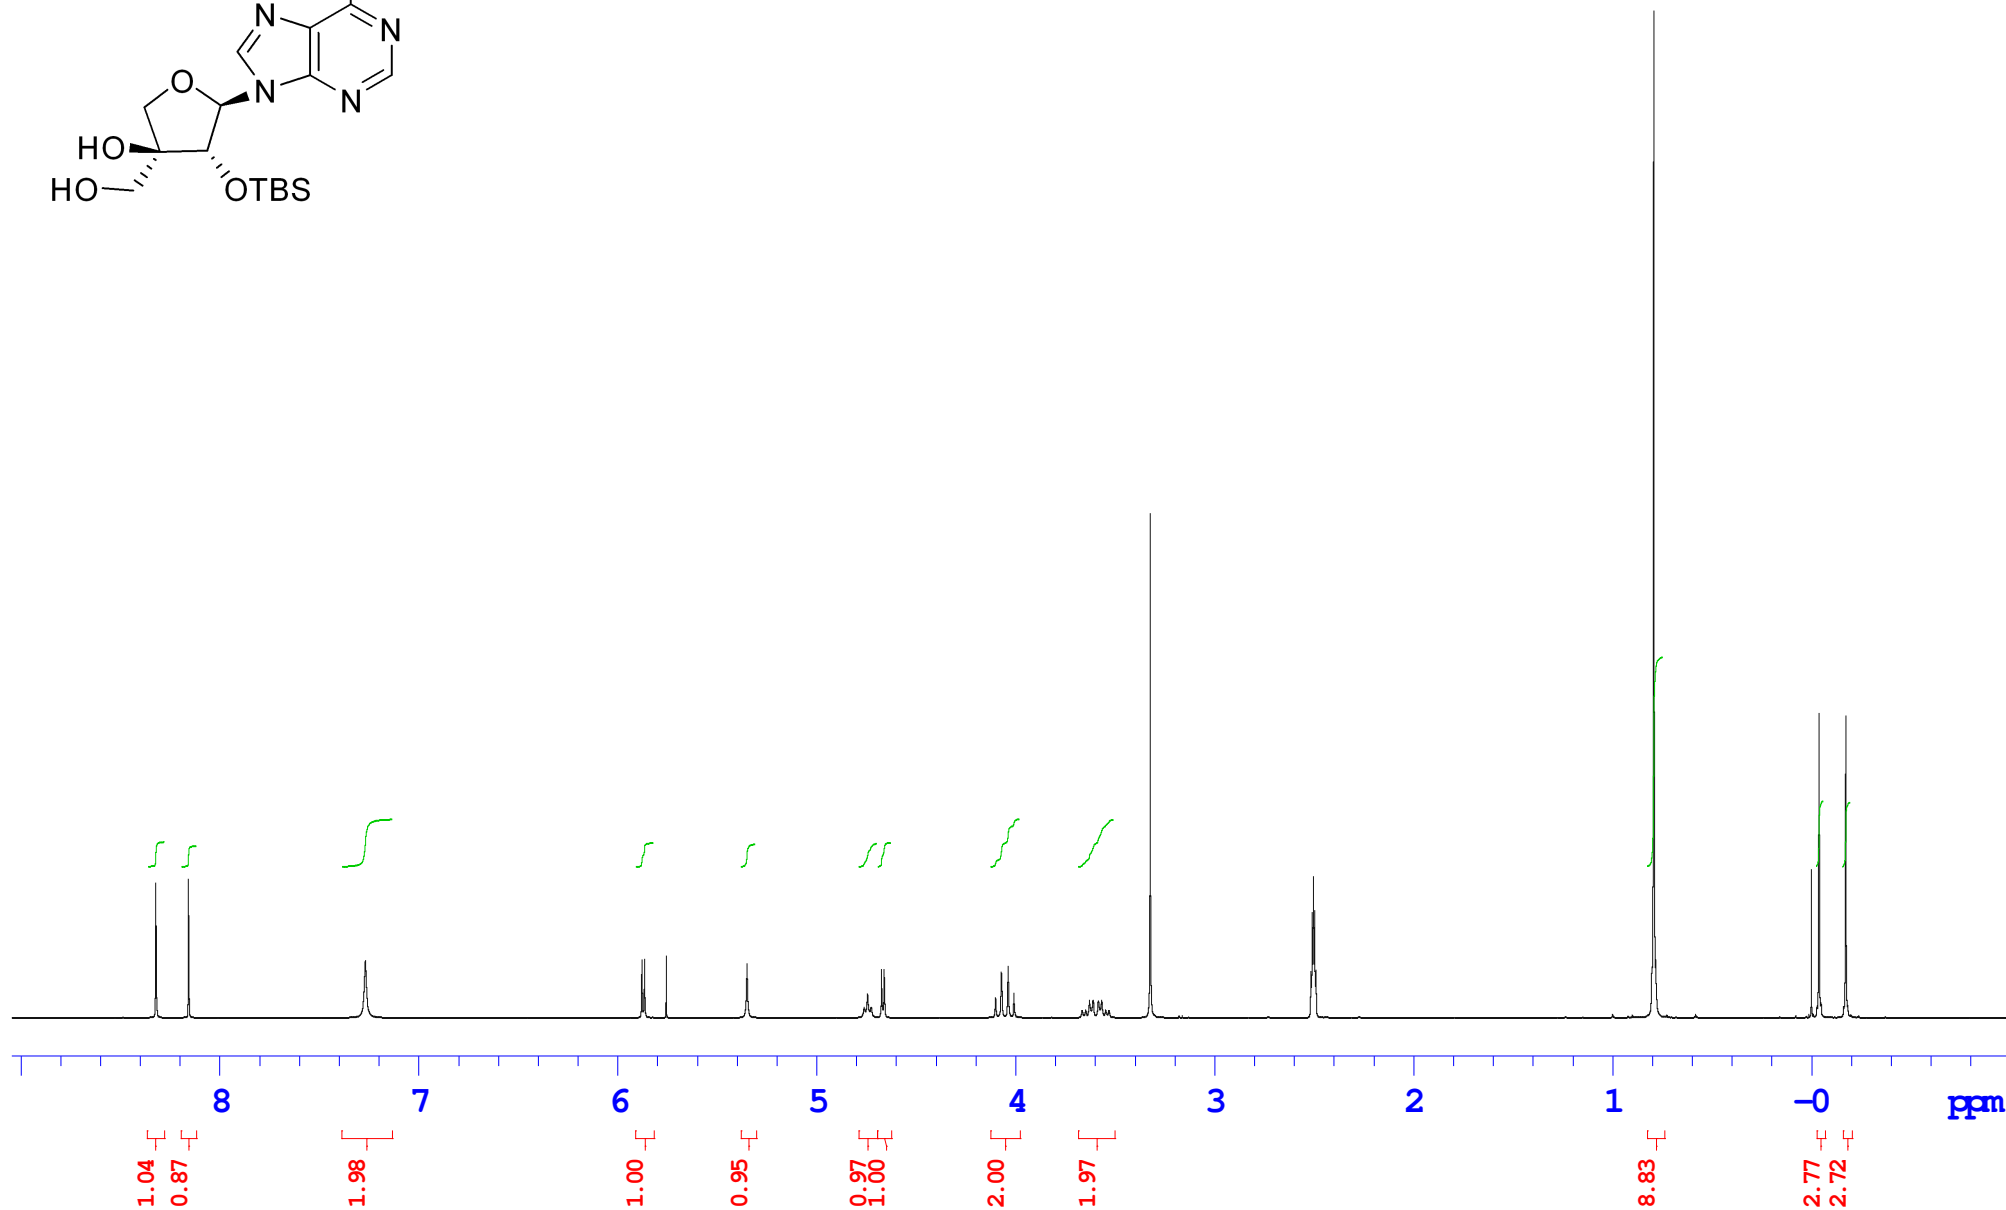

C NMR: Compound 24

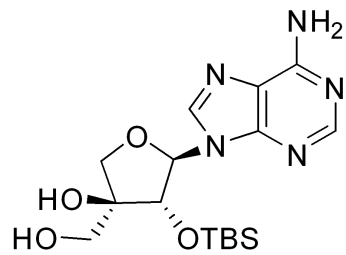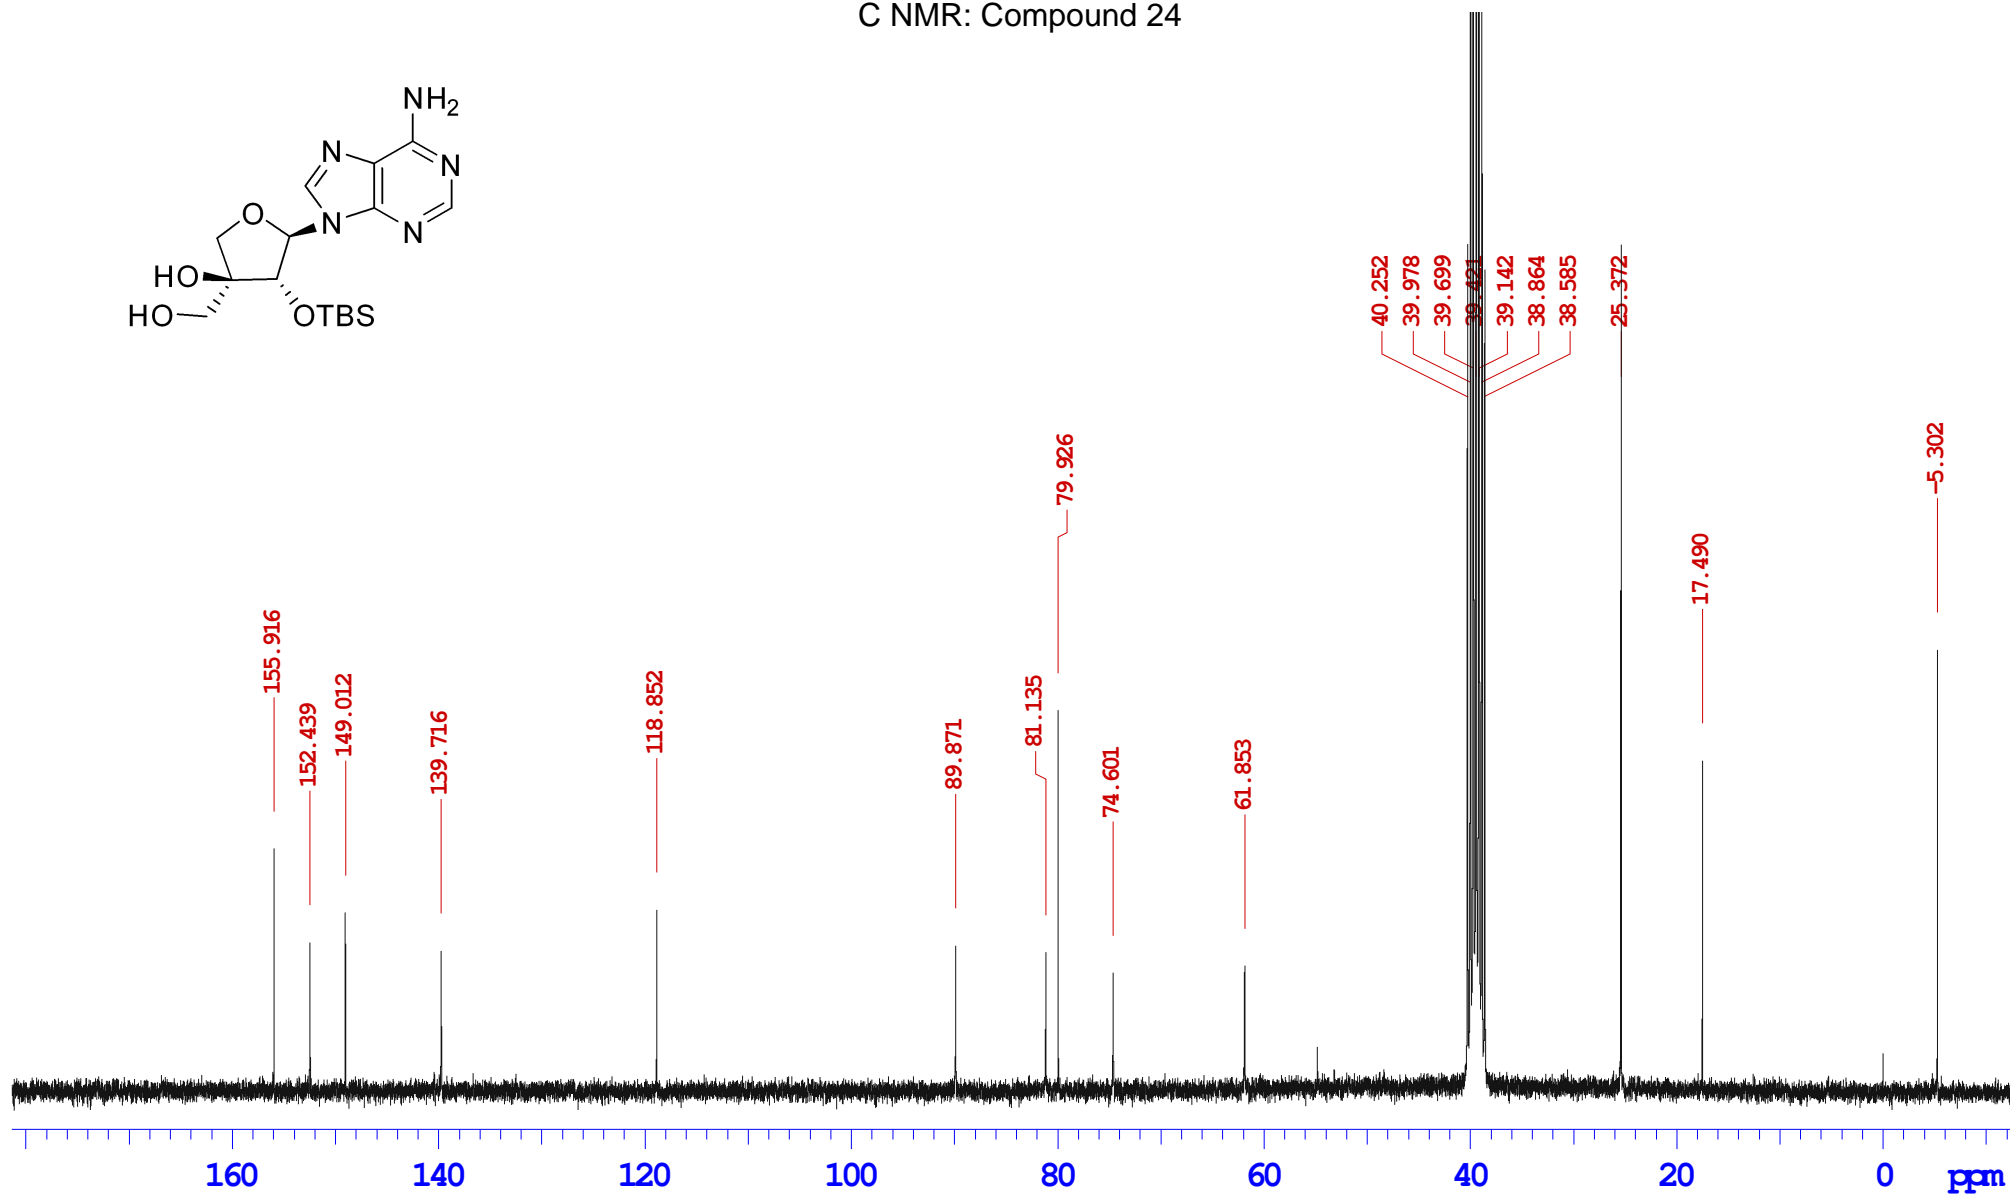

H NMR: Compound 25

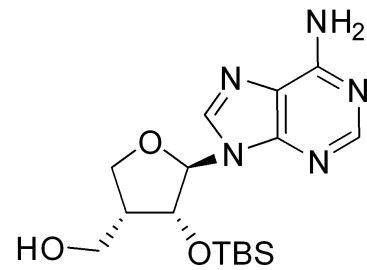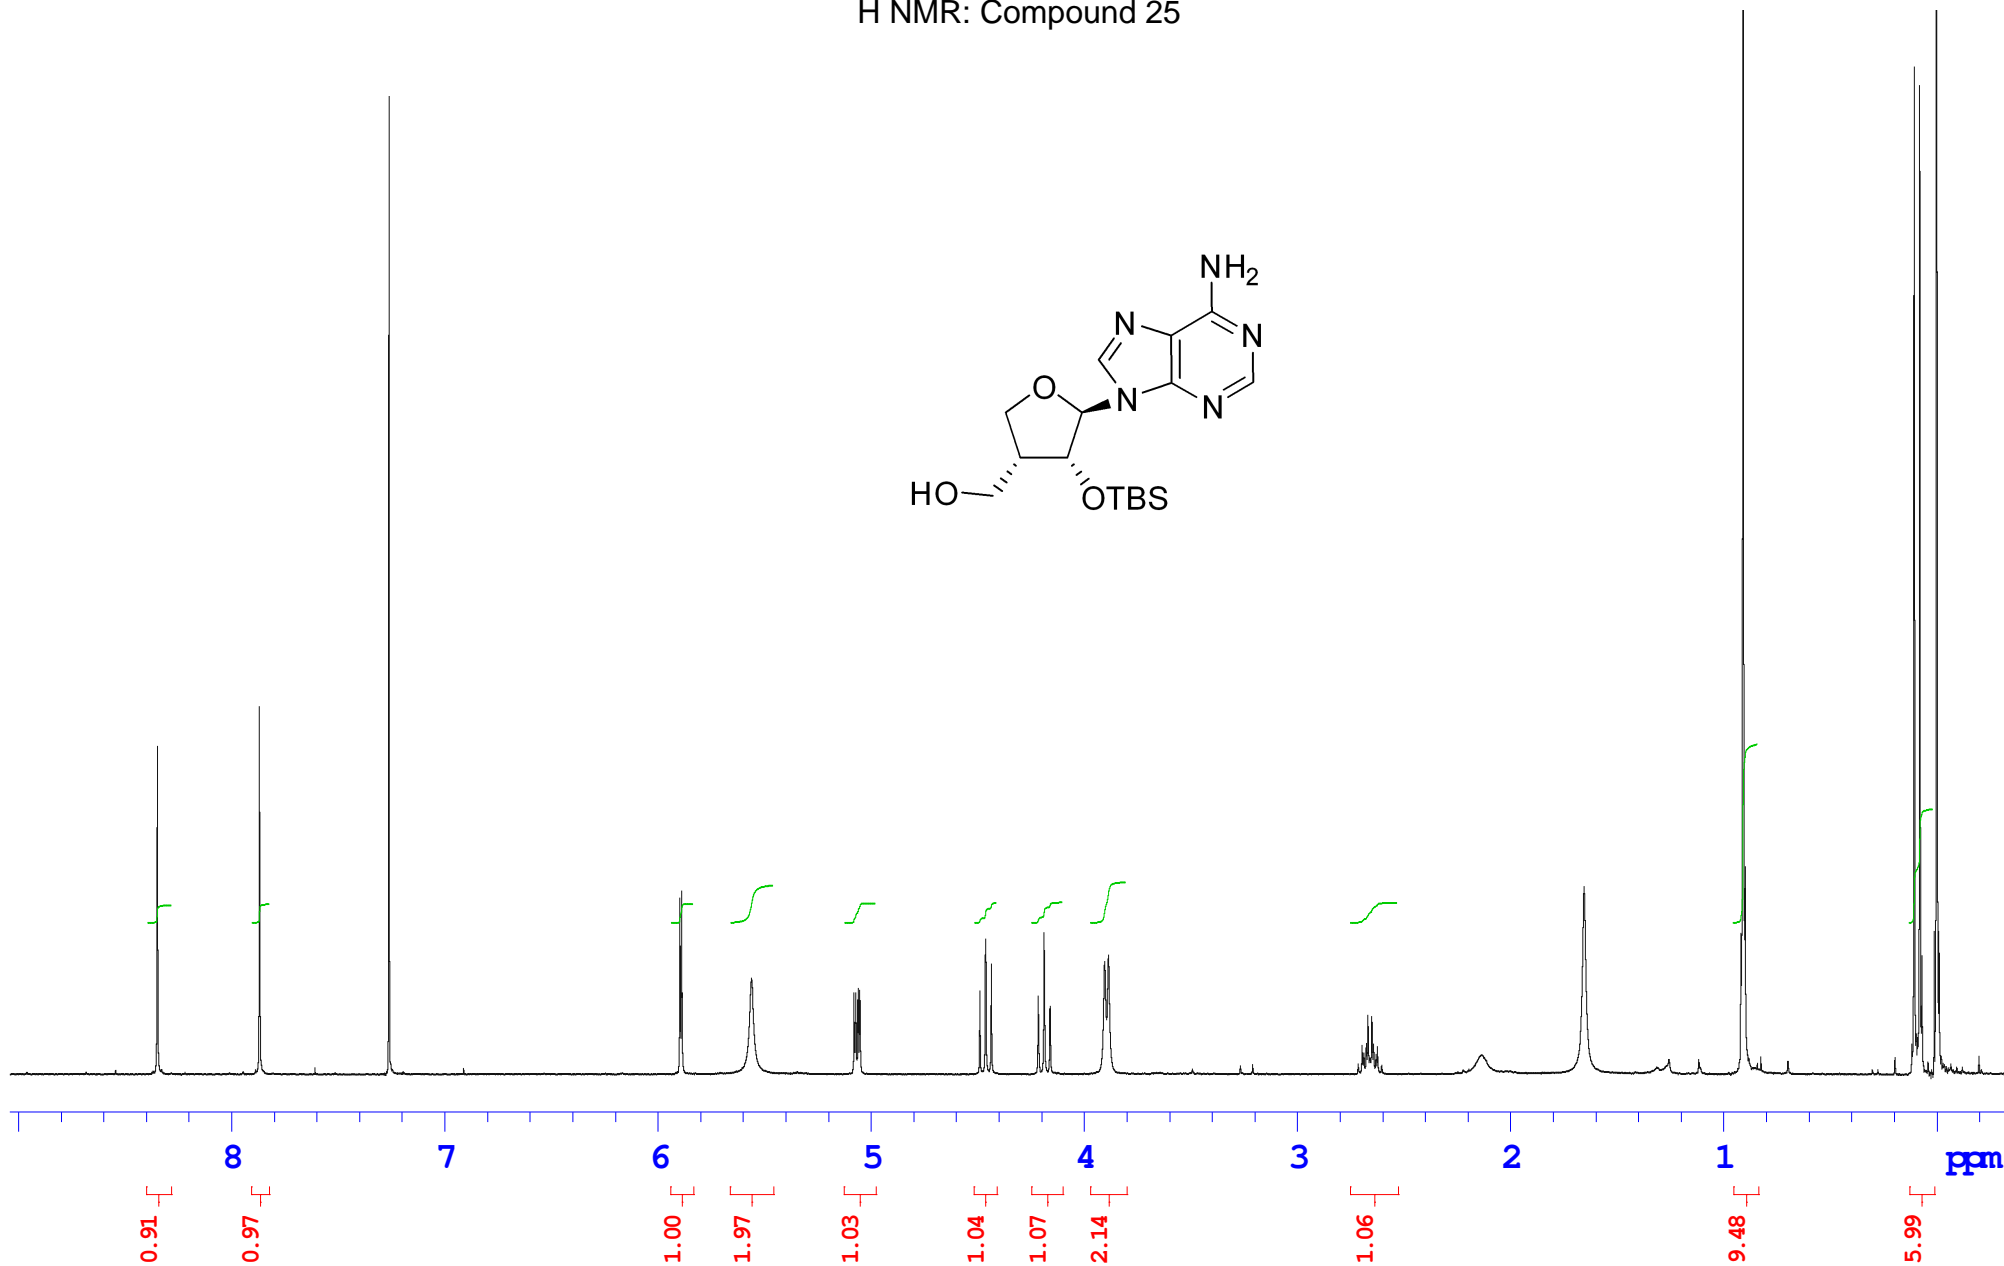

C NMR: Compound 25

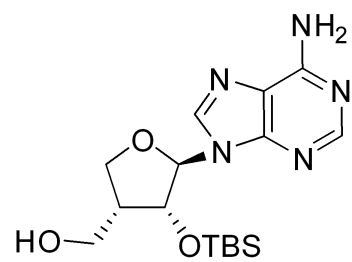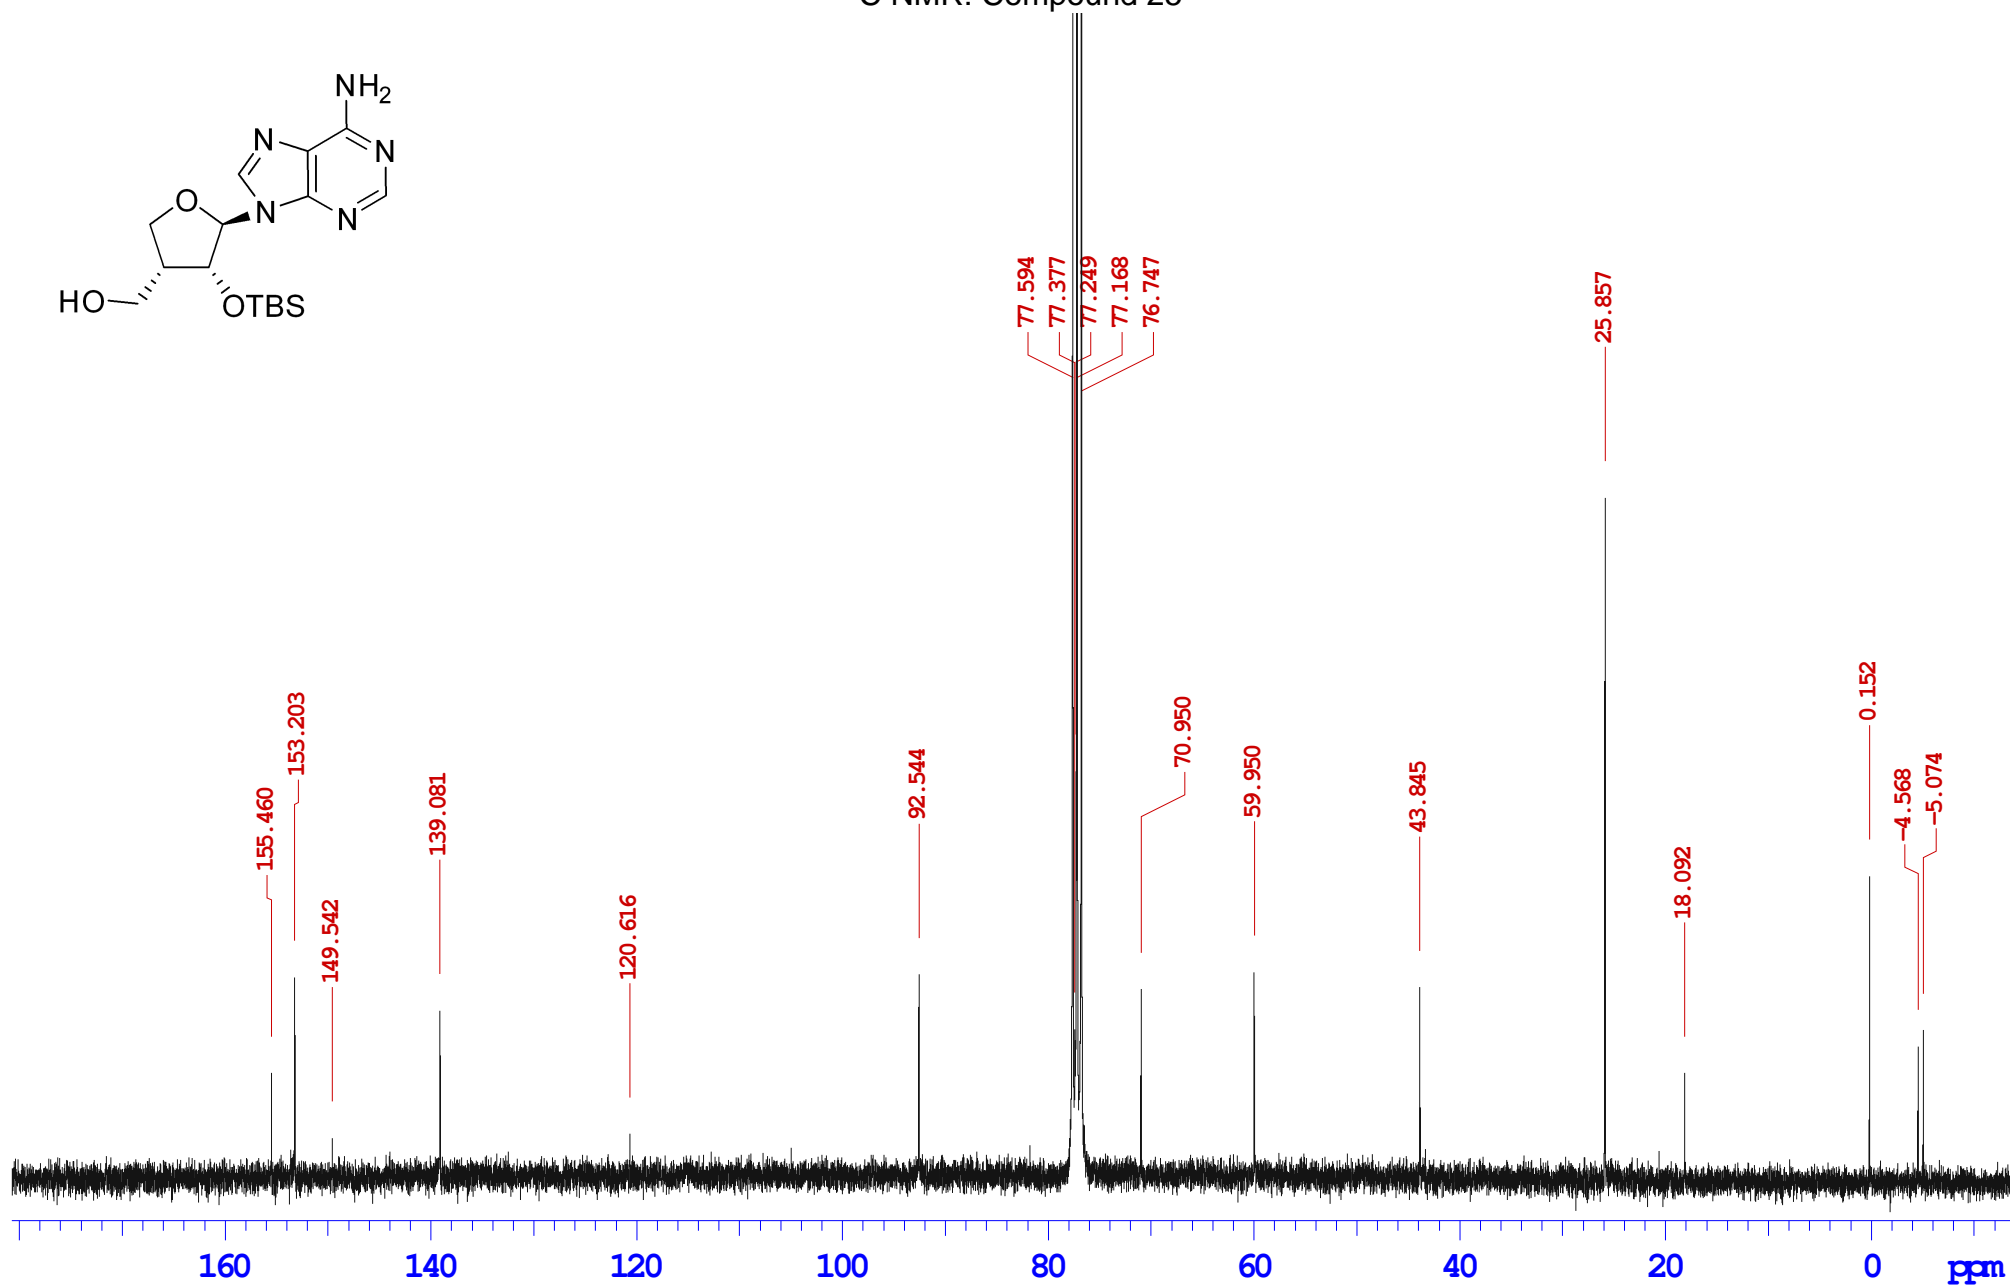

H NMR: Compound 26

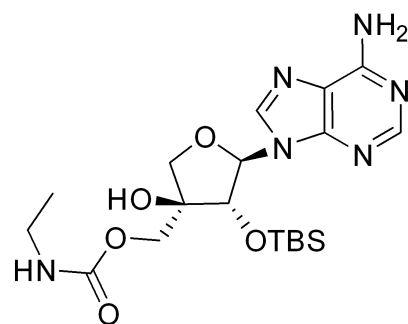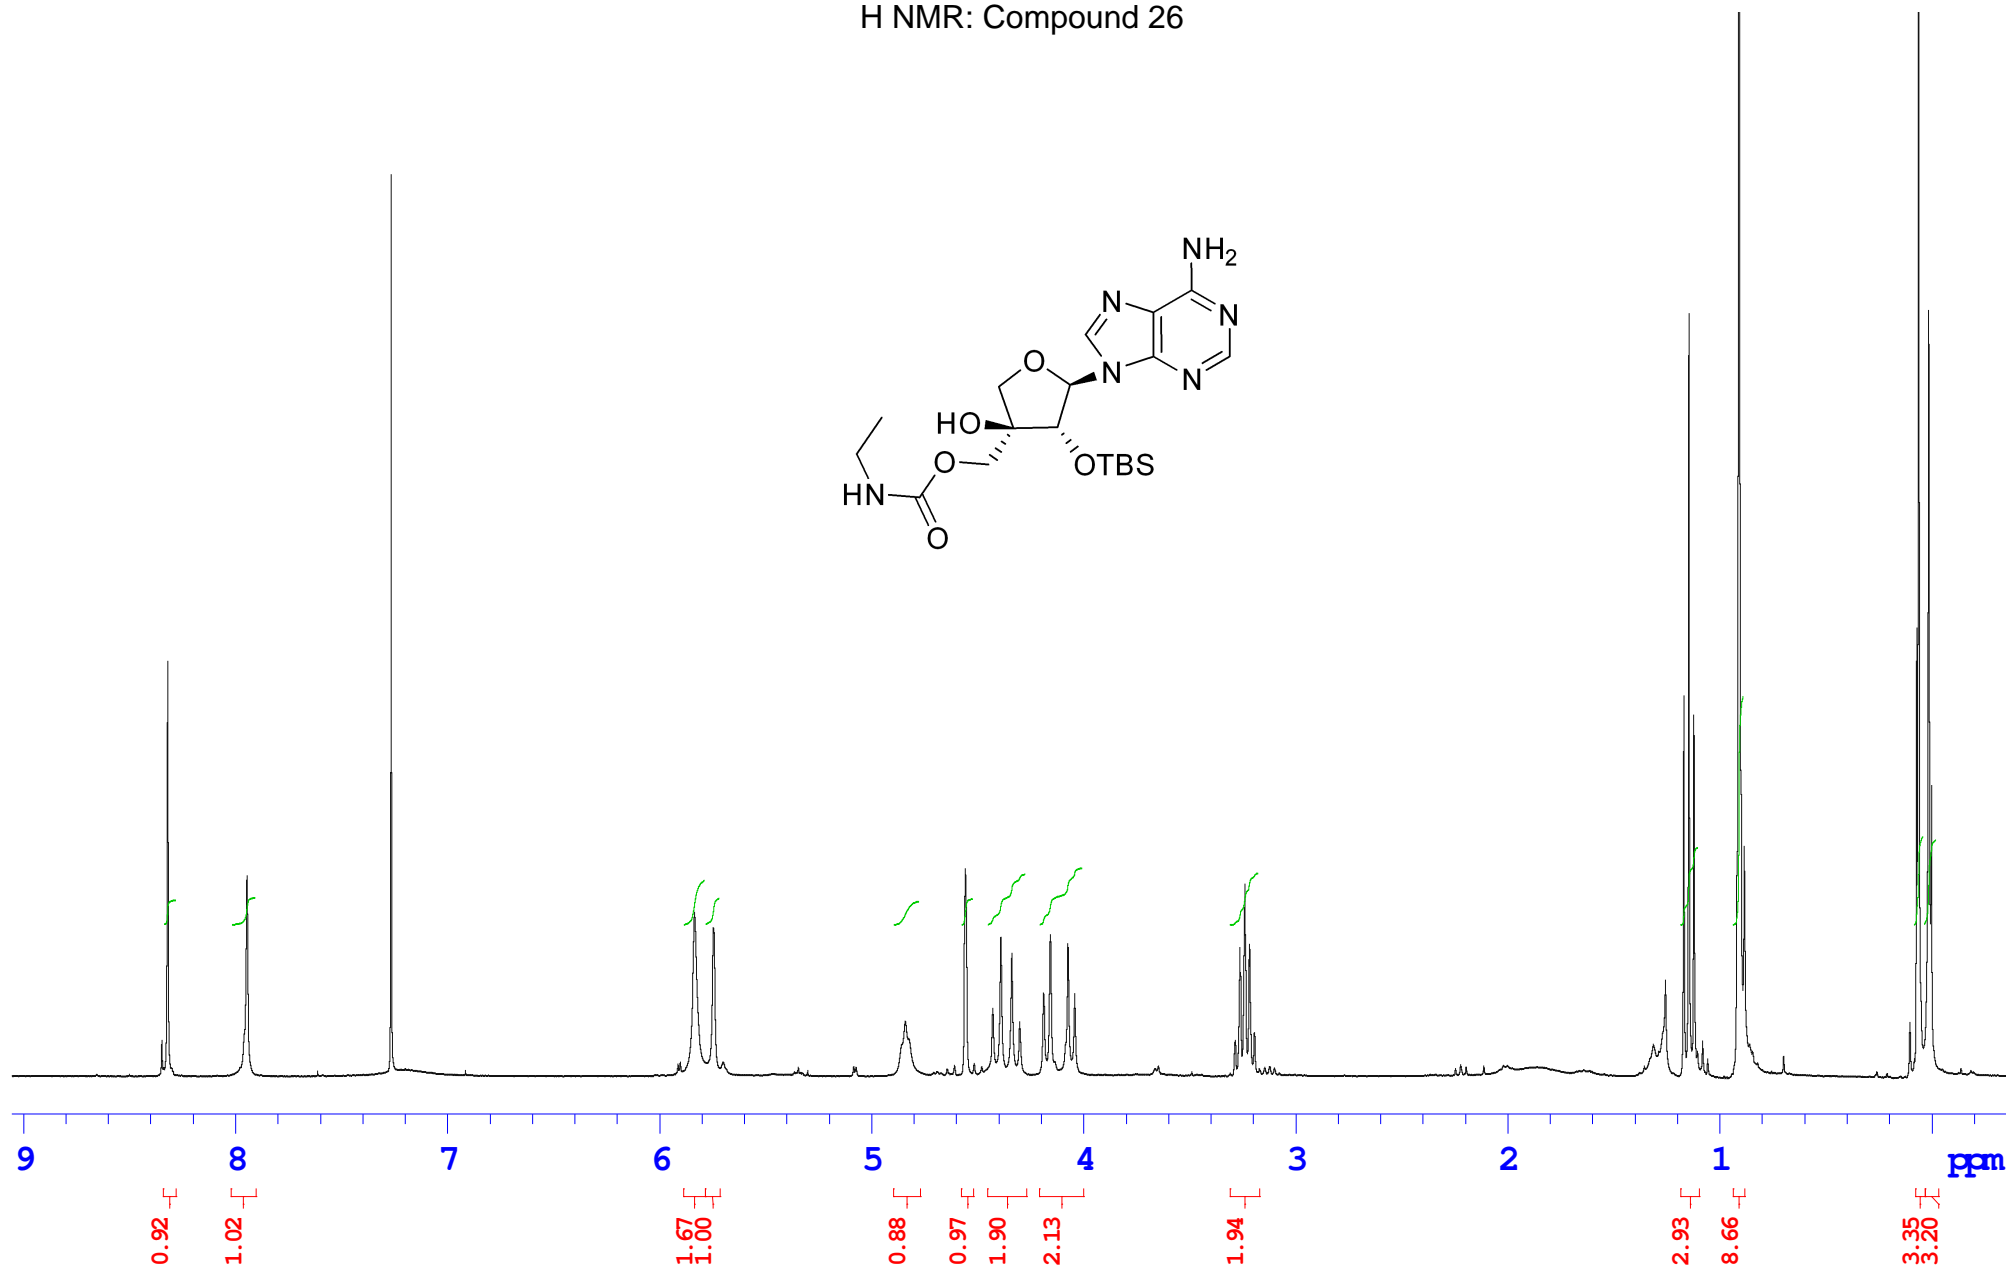

C NMR: Compound 26

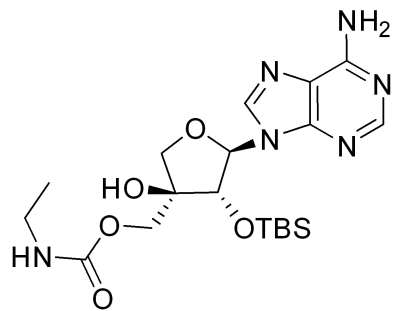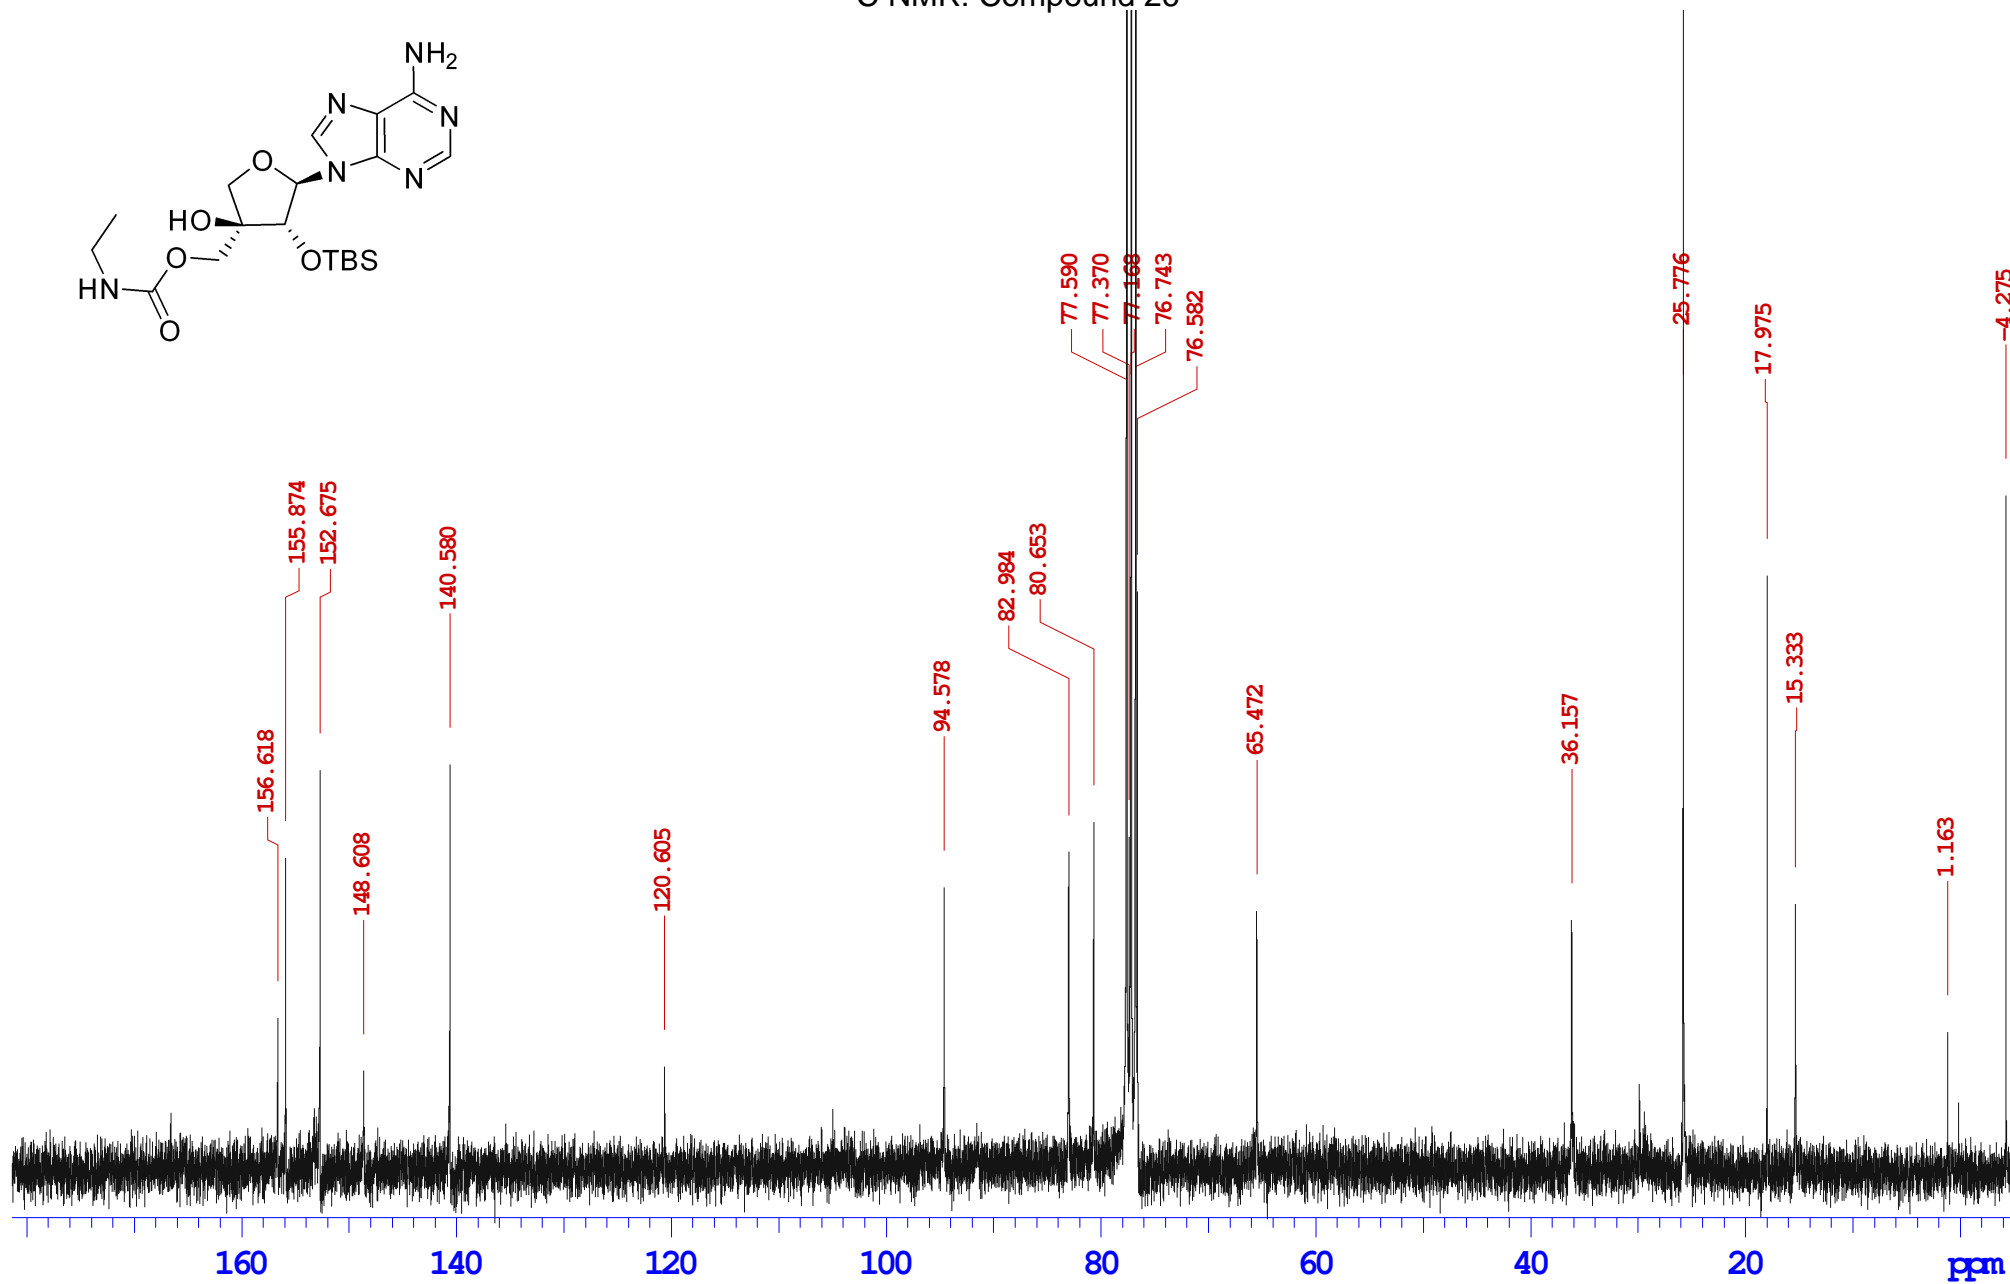



H NMR: Compound 27

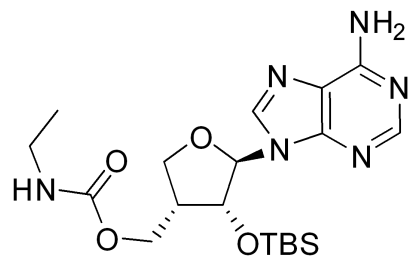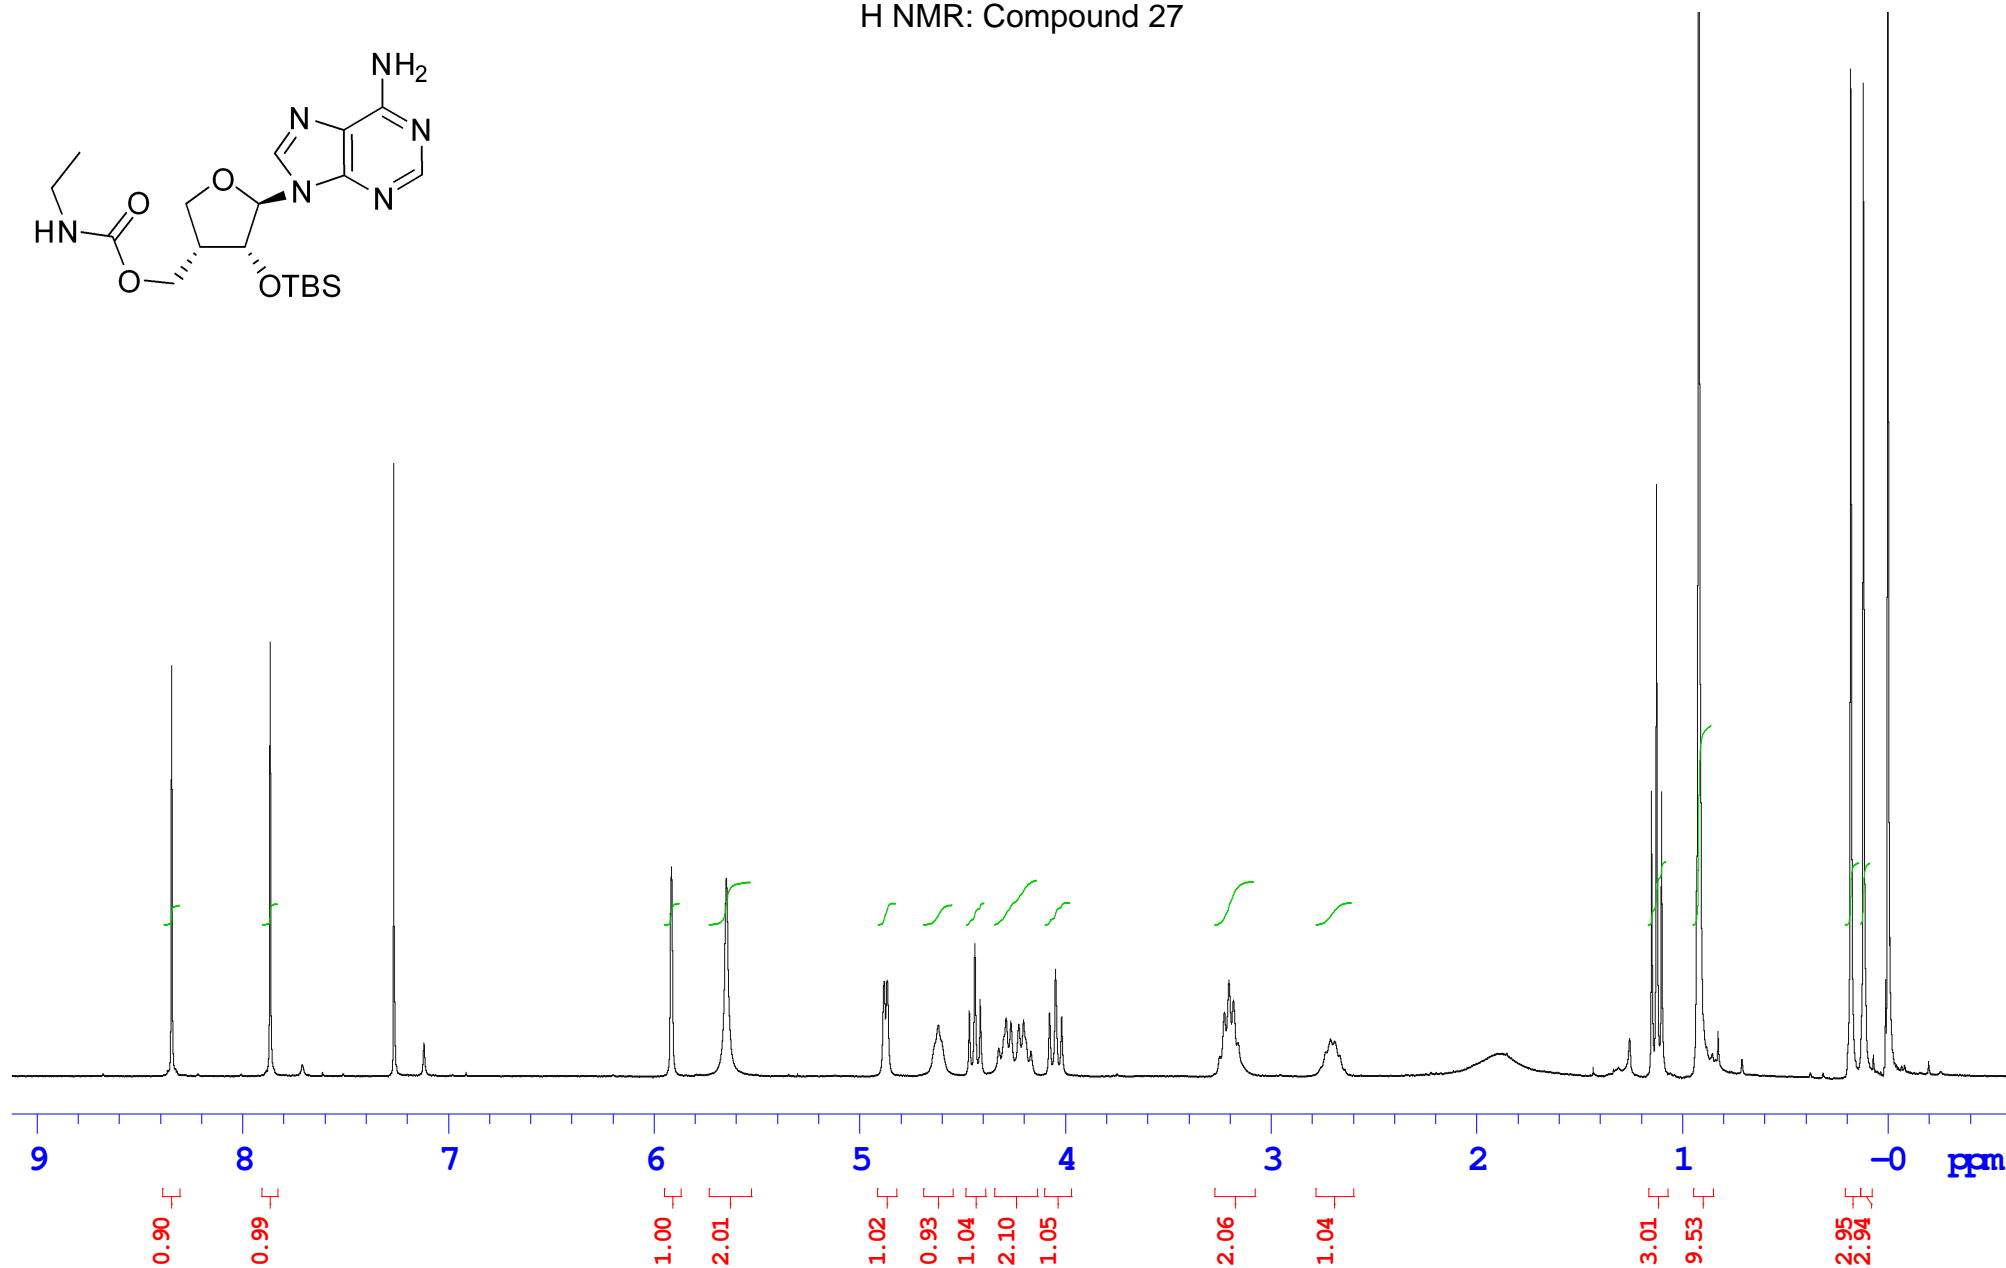

C NMR: Compound 28

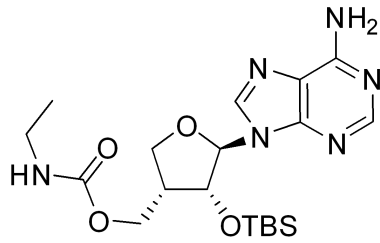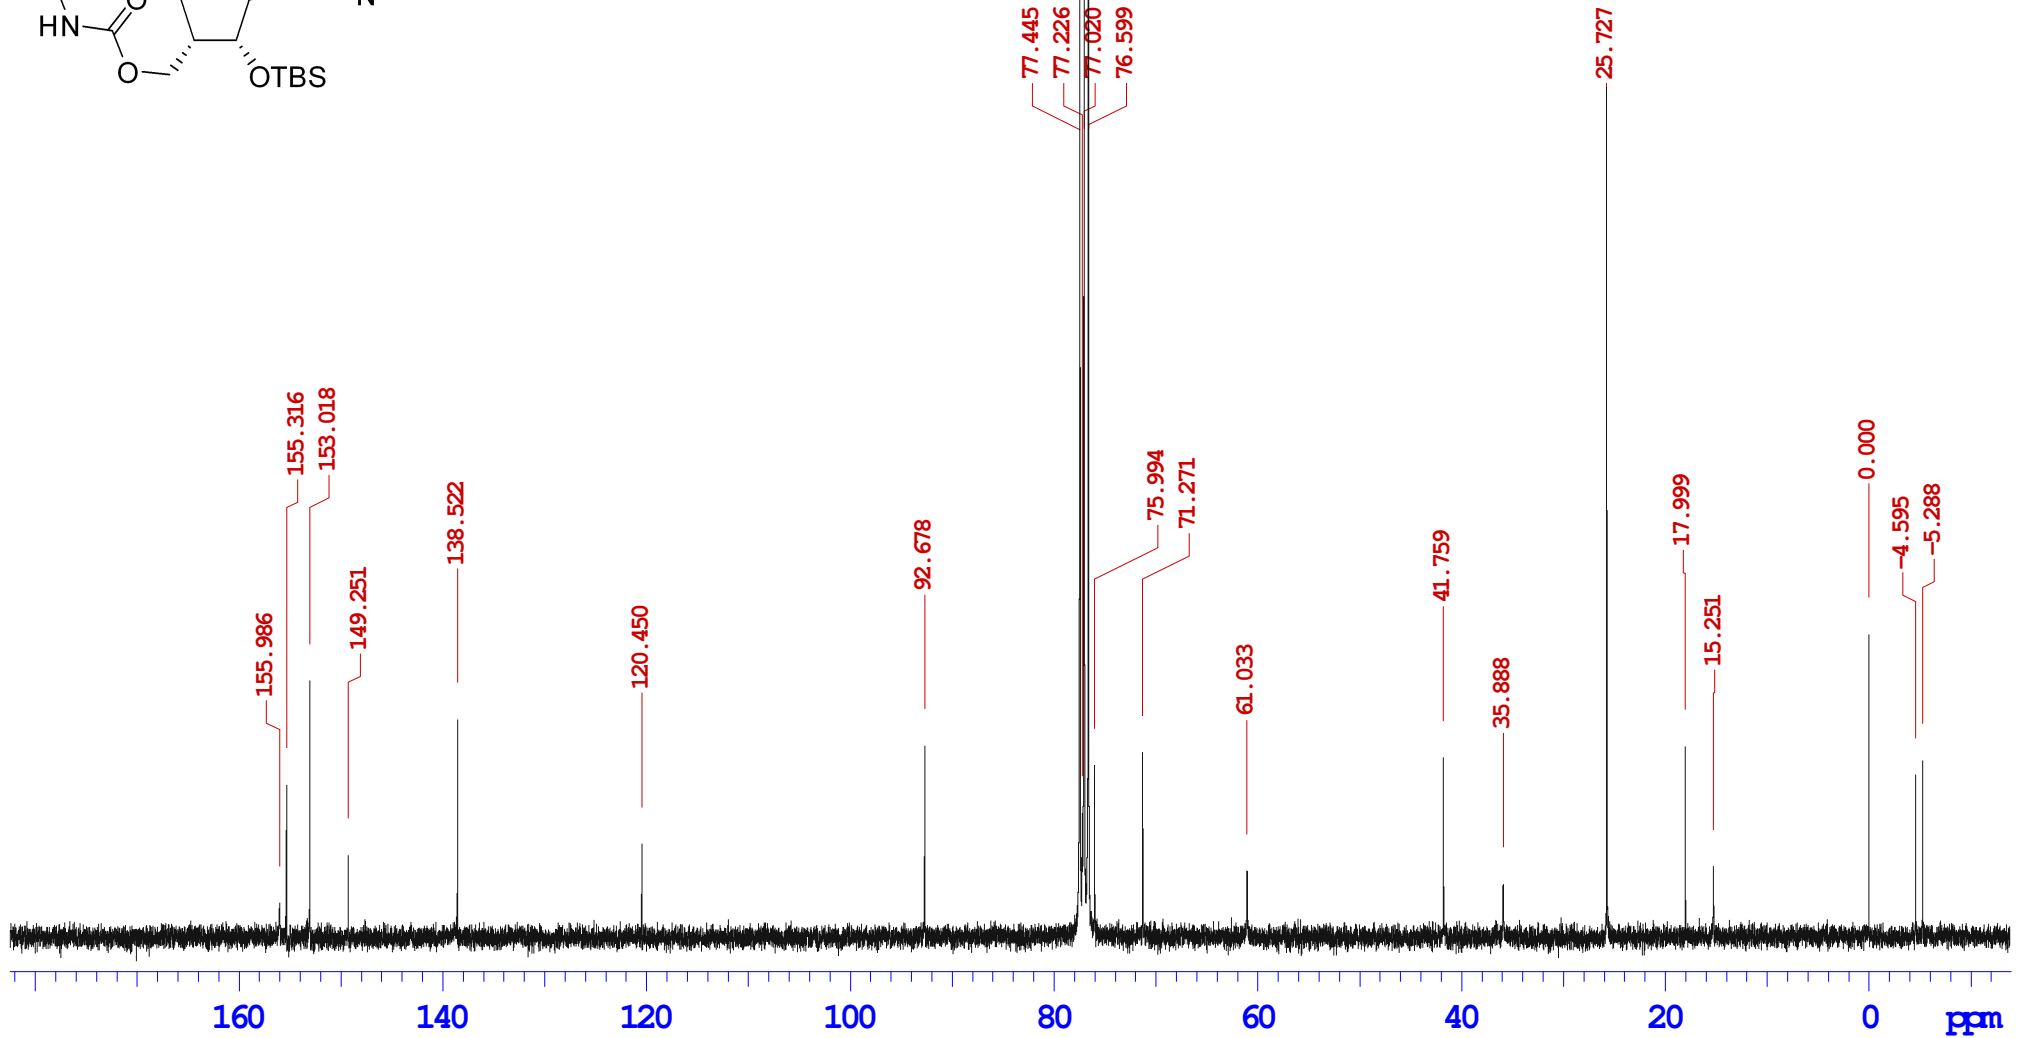

H NMR: Compound 28

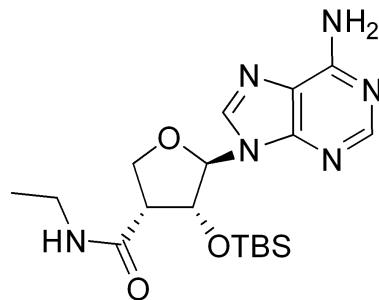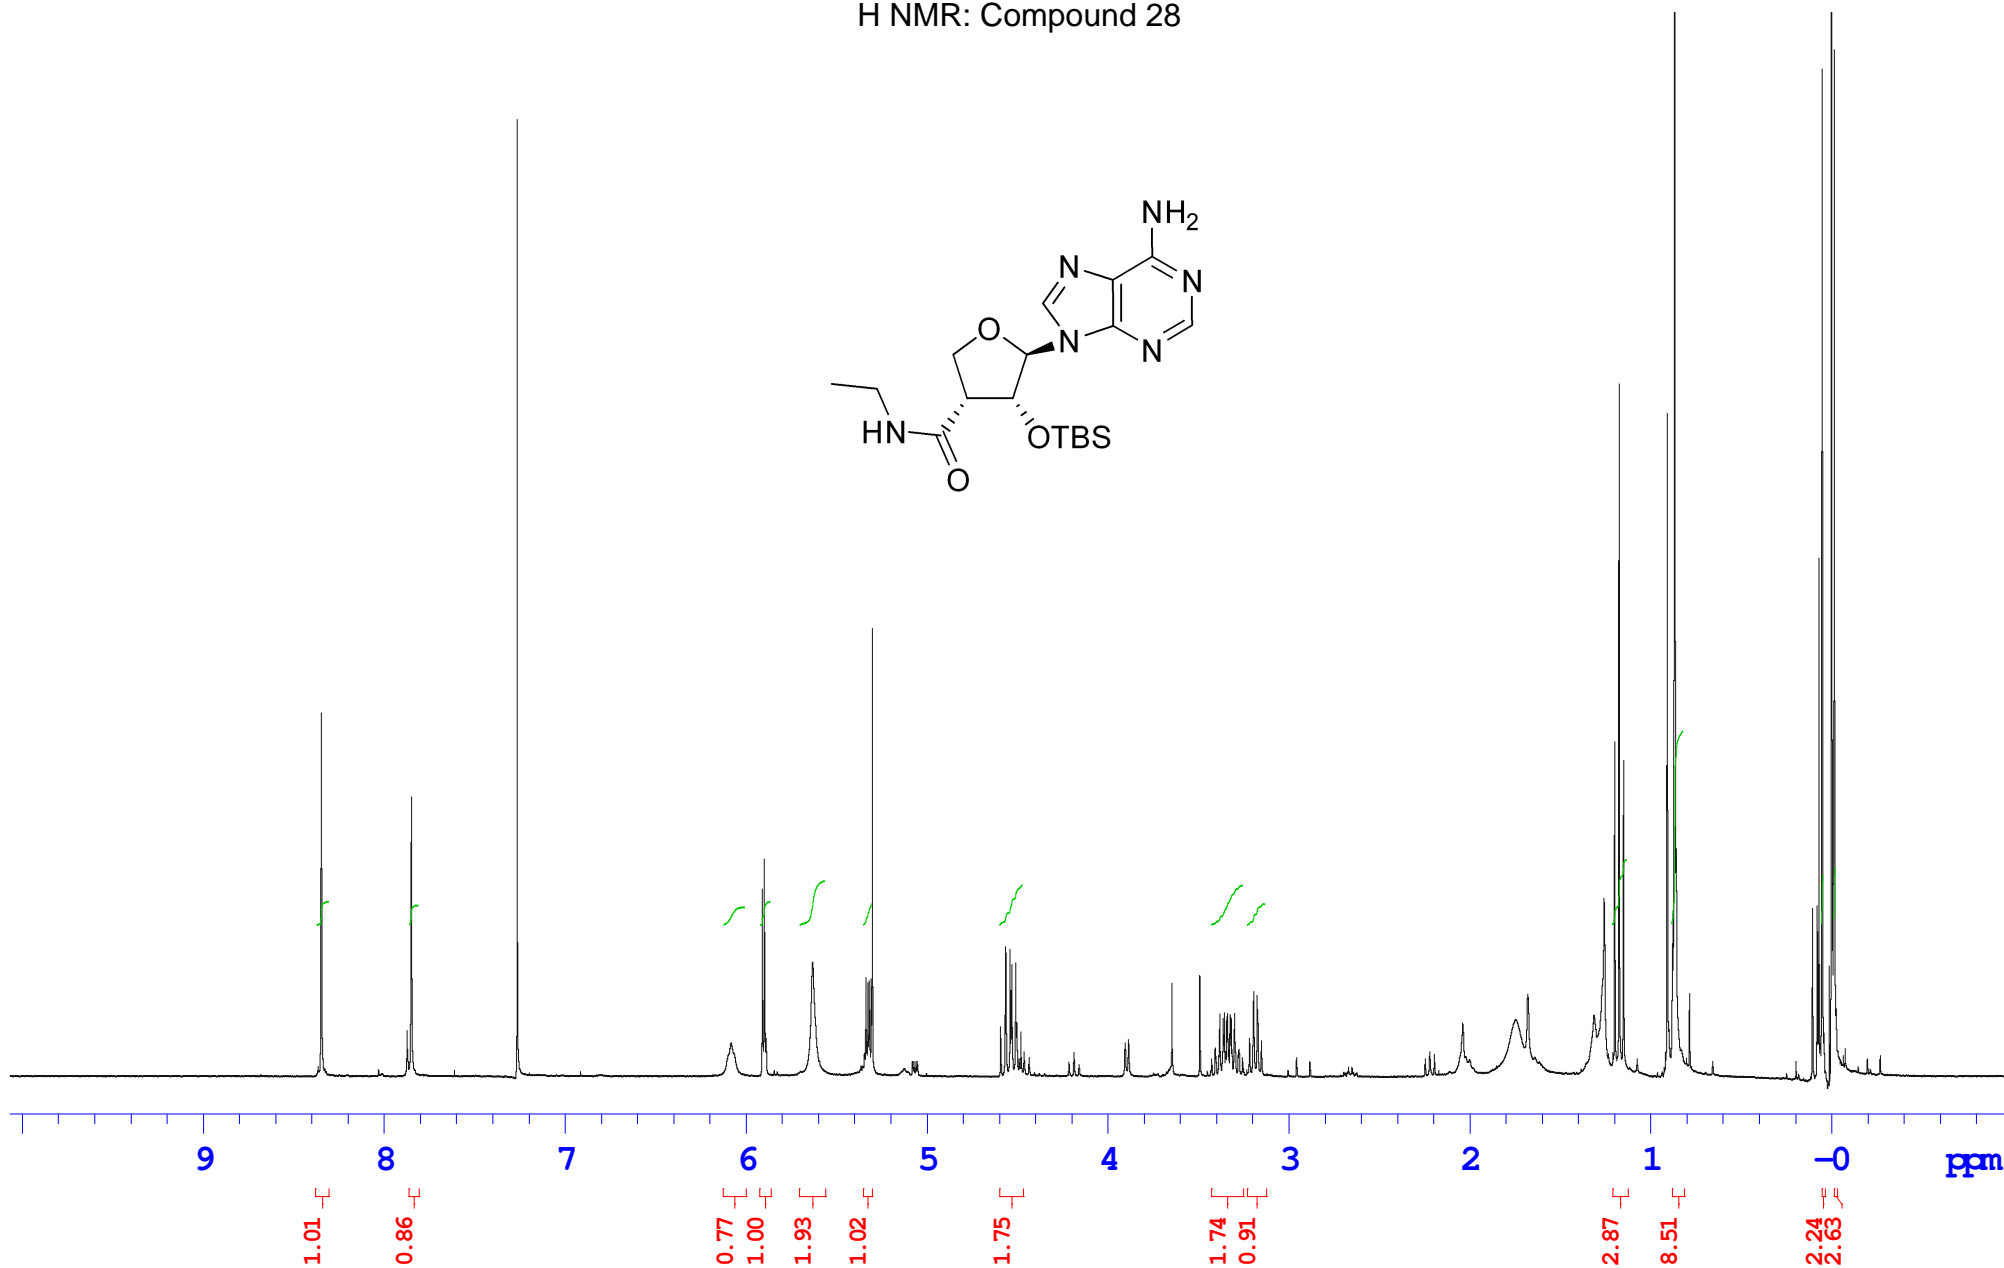

H NMR: Compound 29

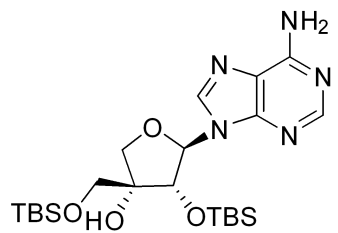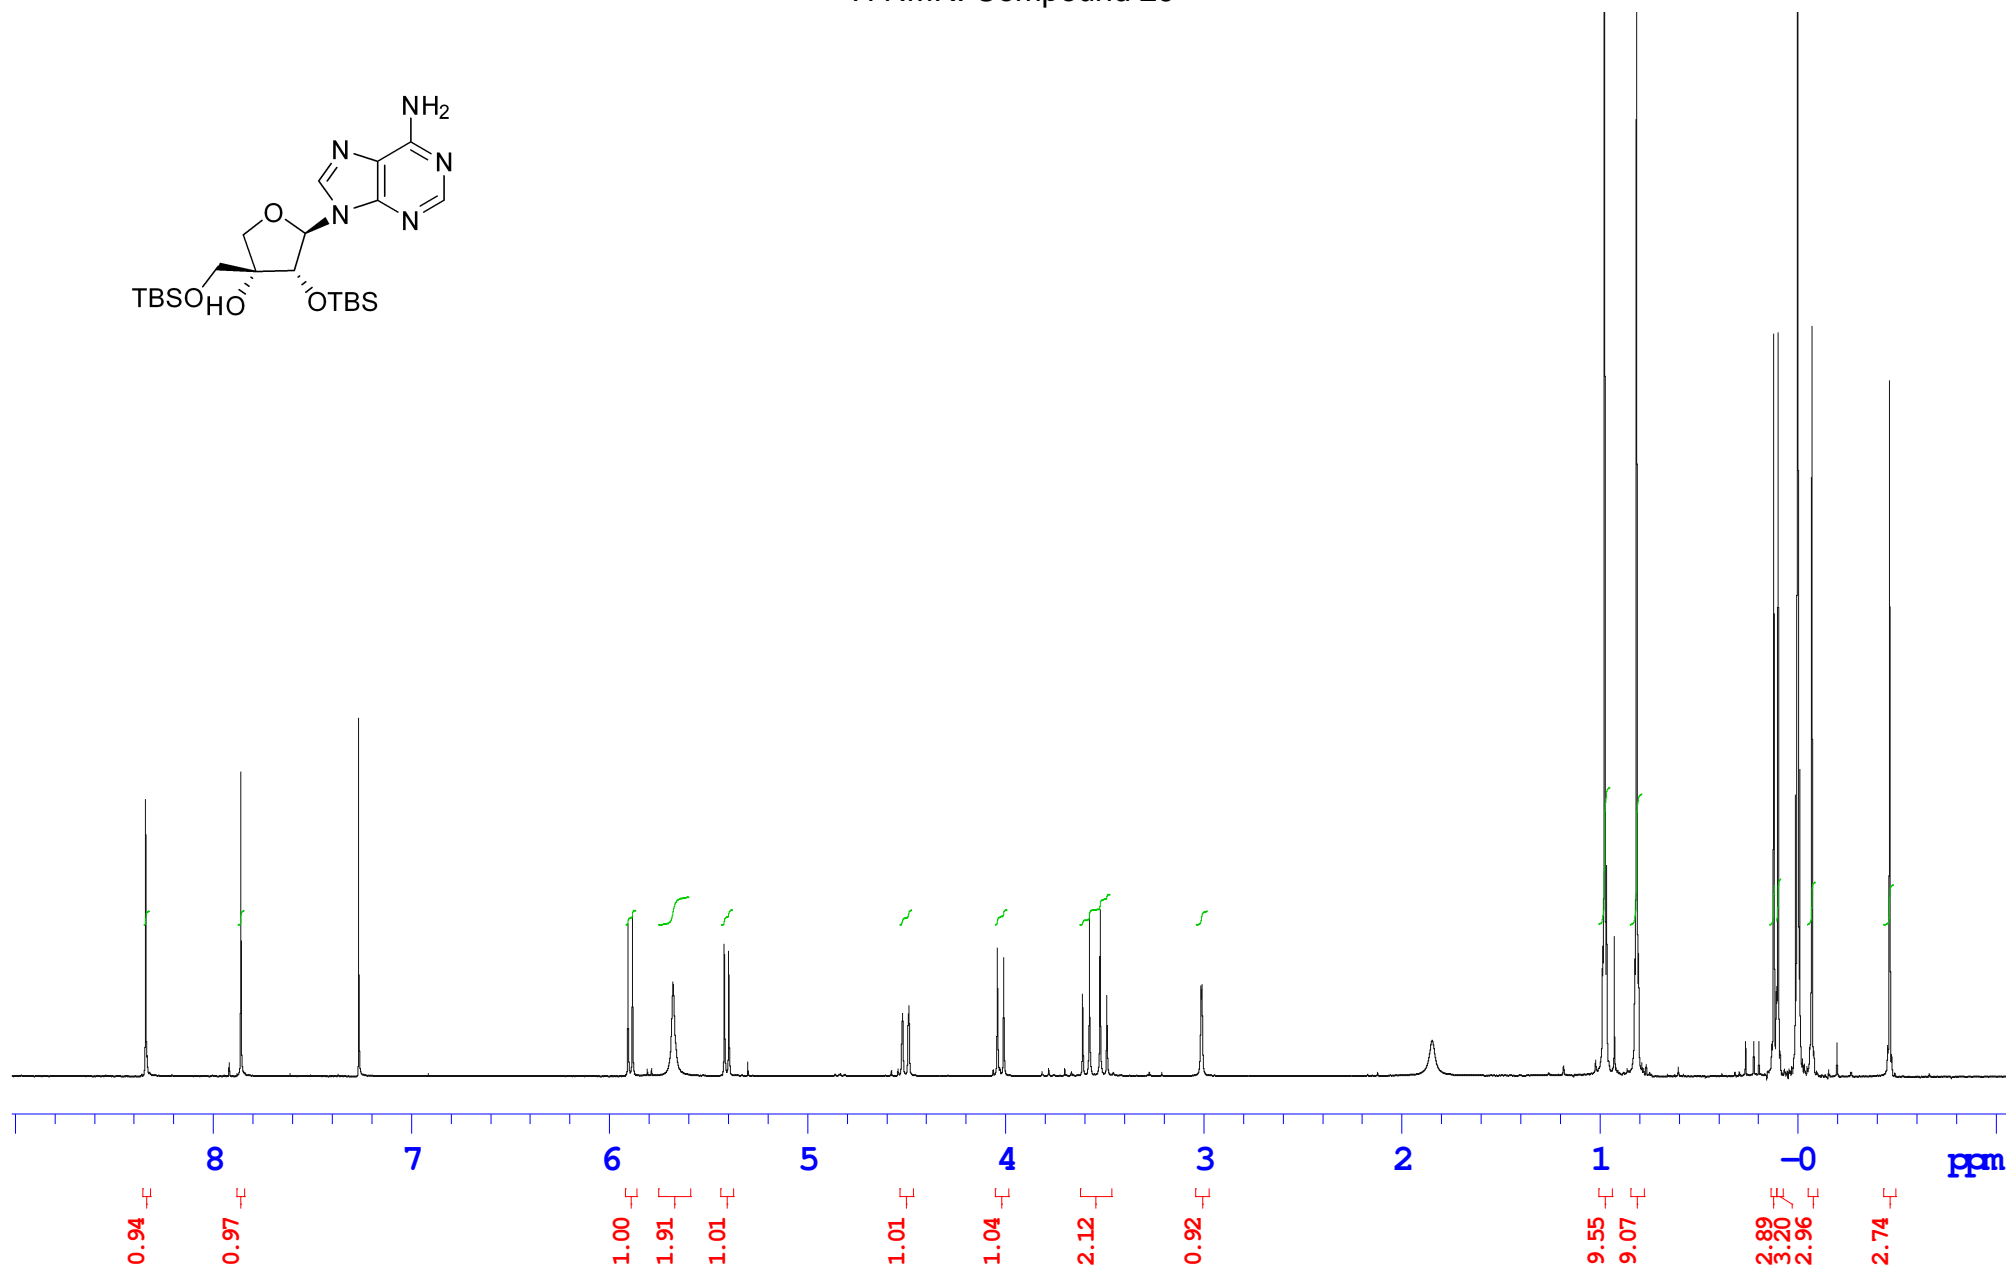

C NMR: Compound 29

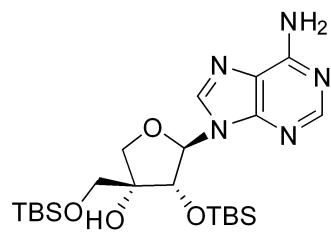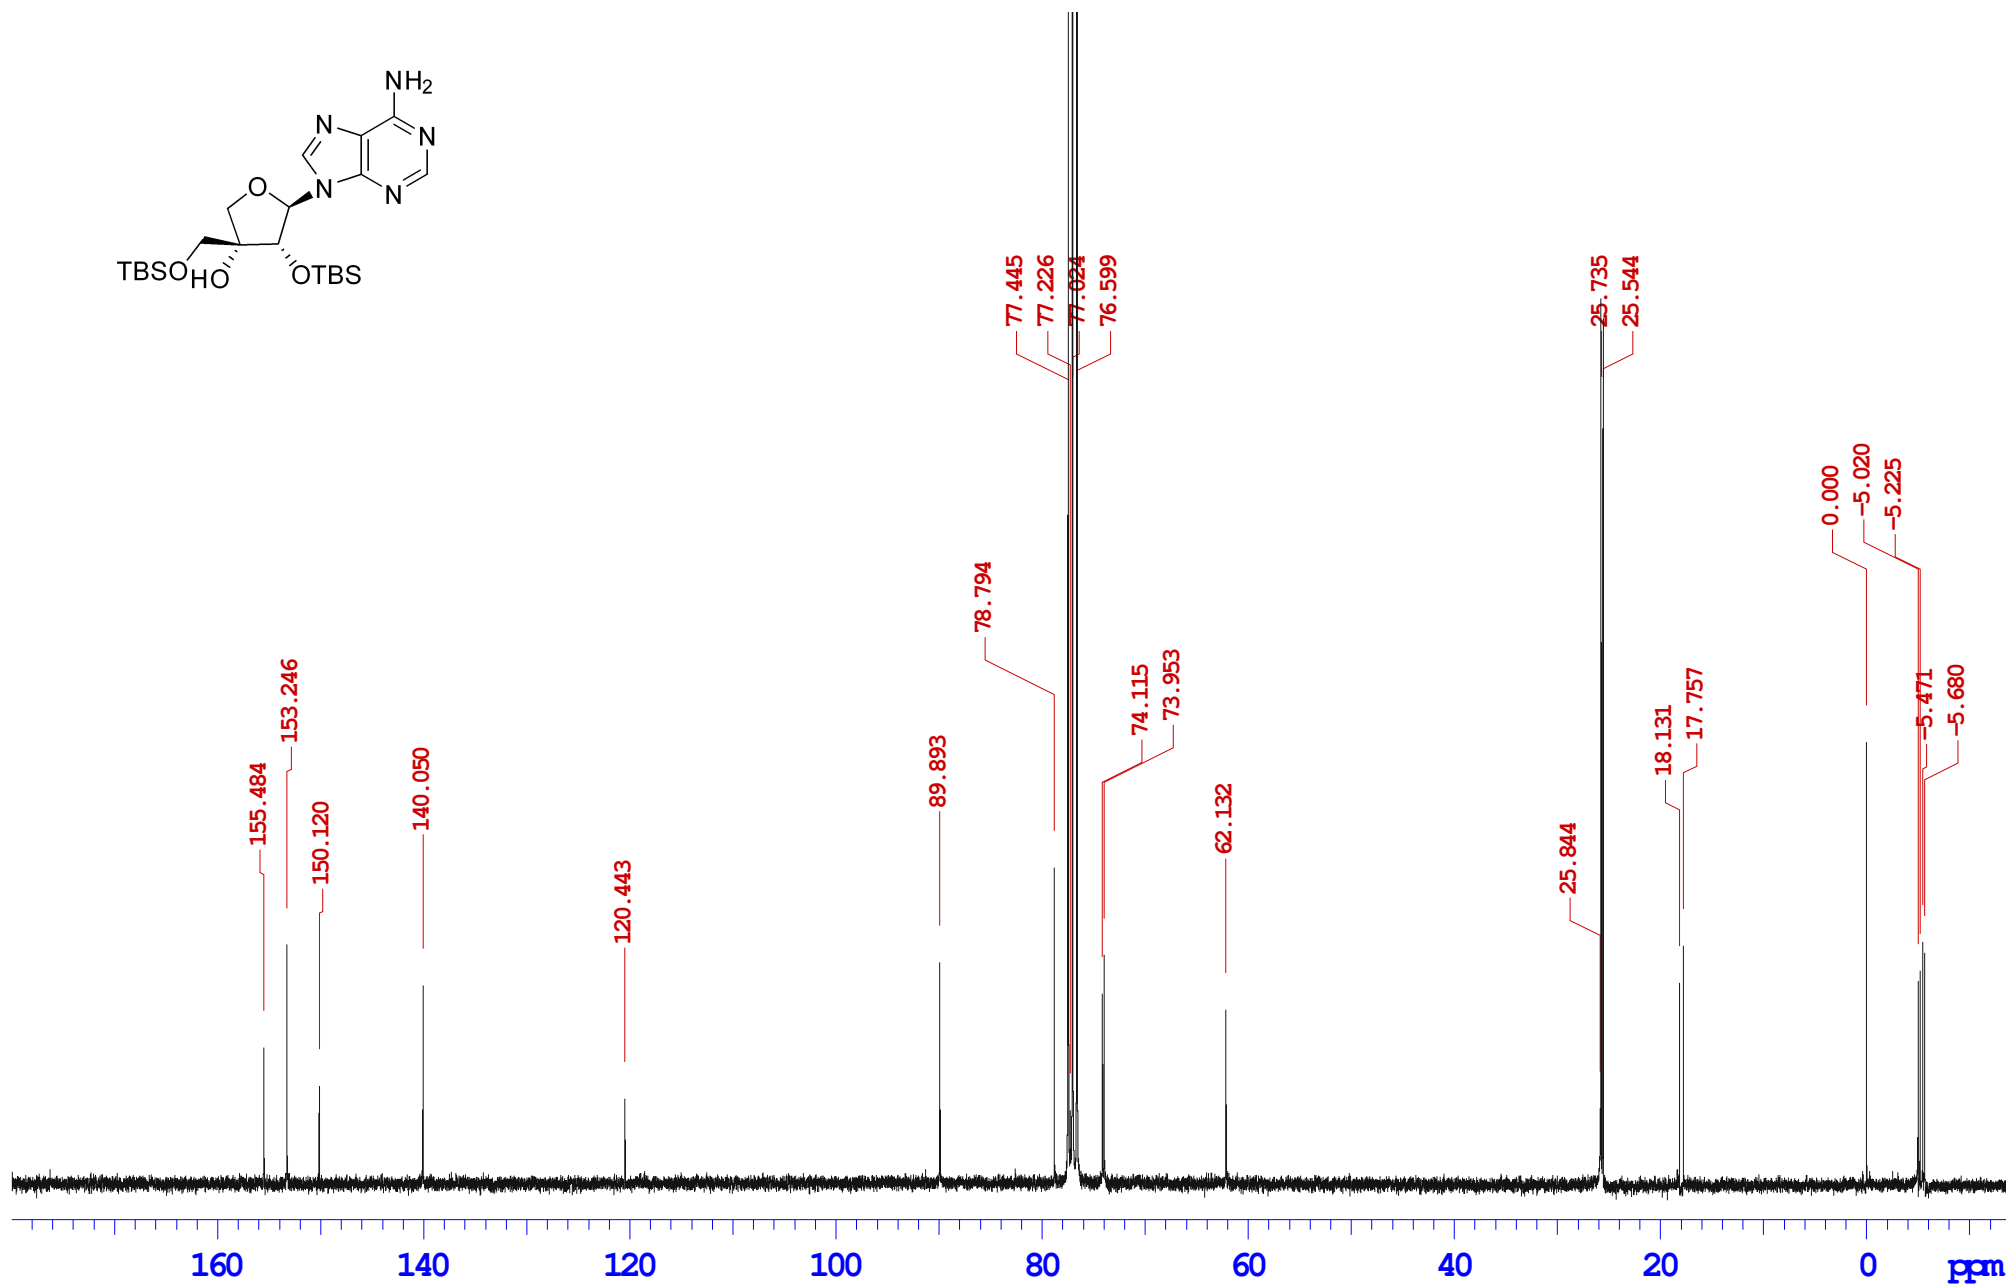

H NMR: Compound 30

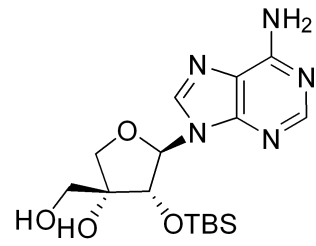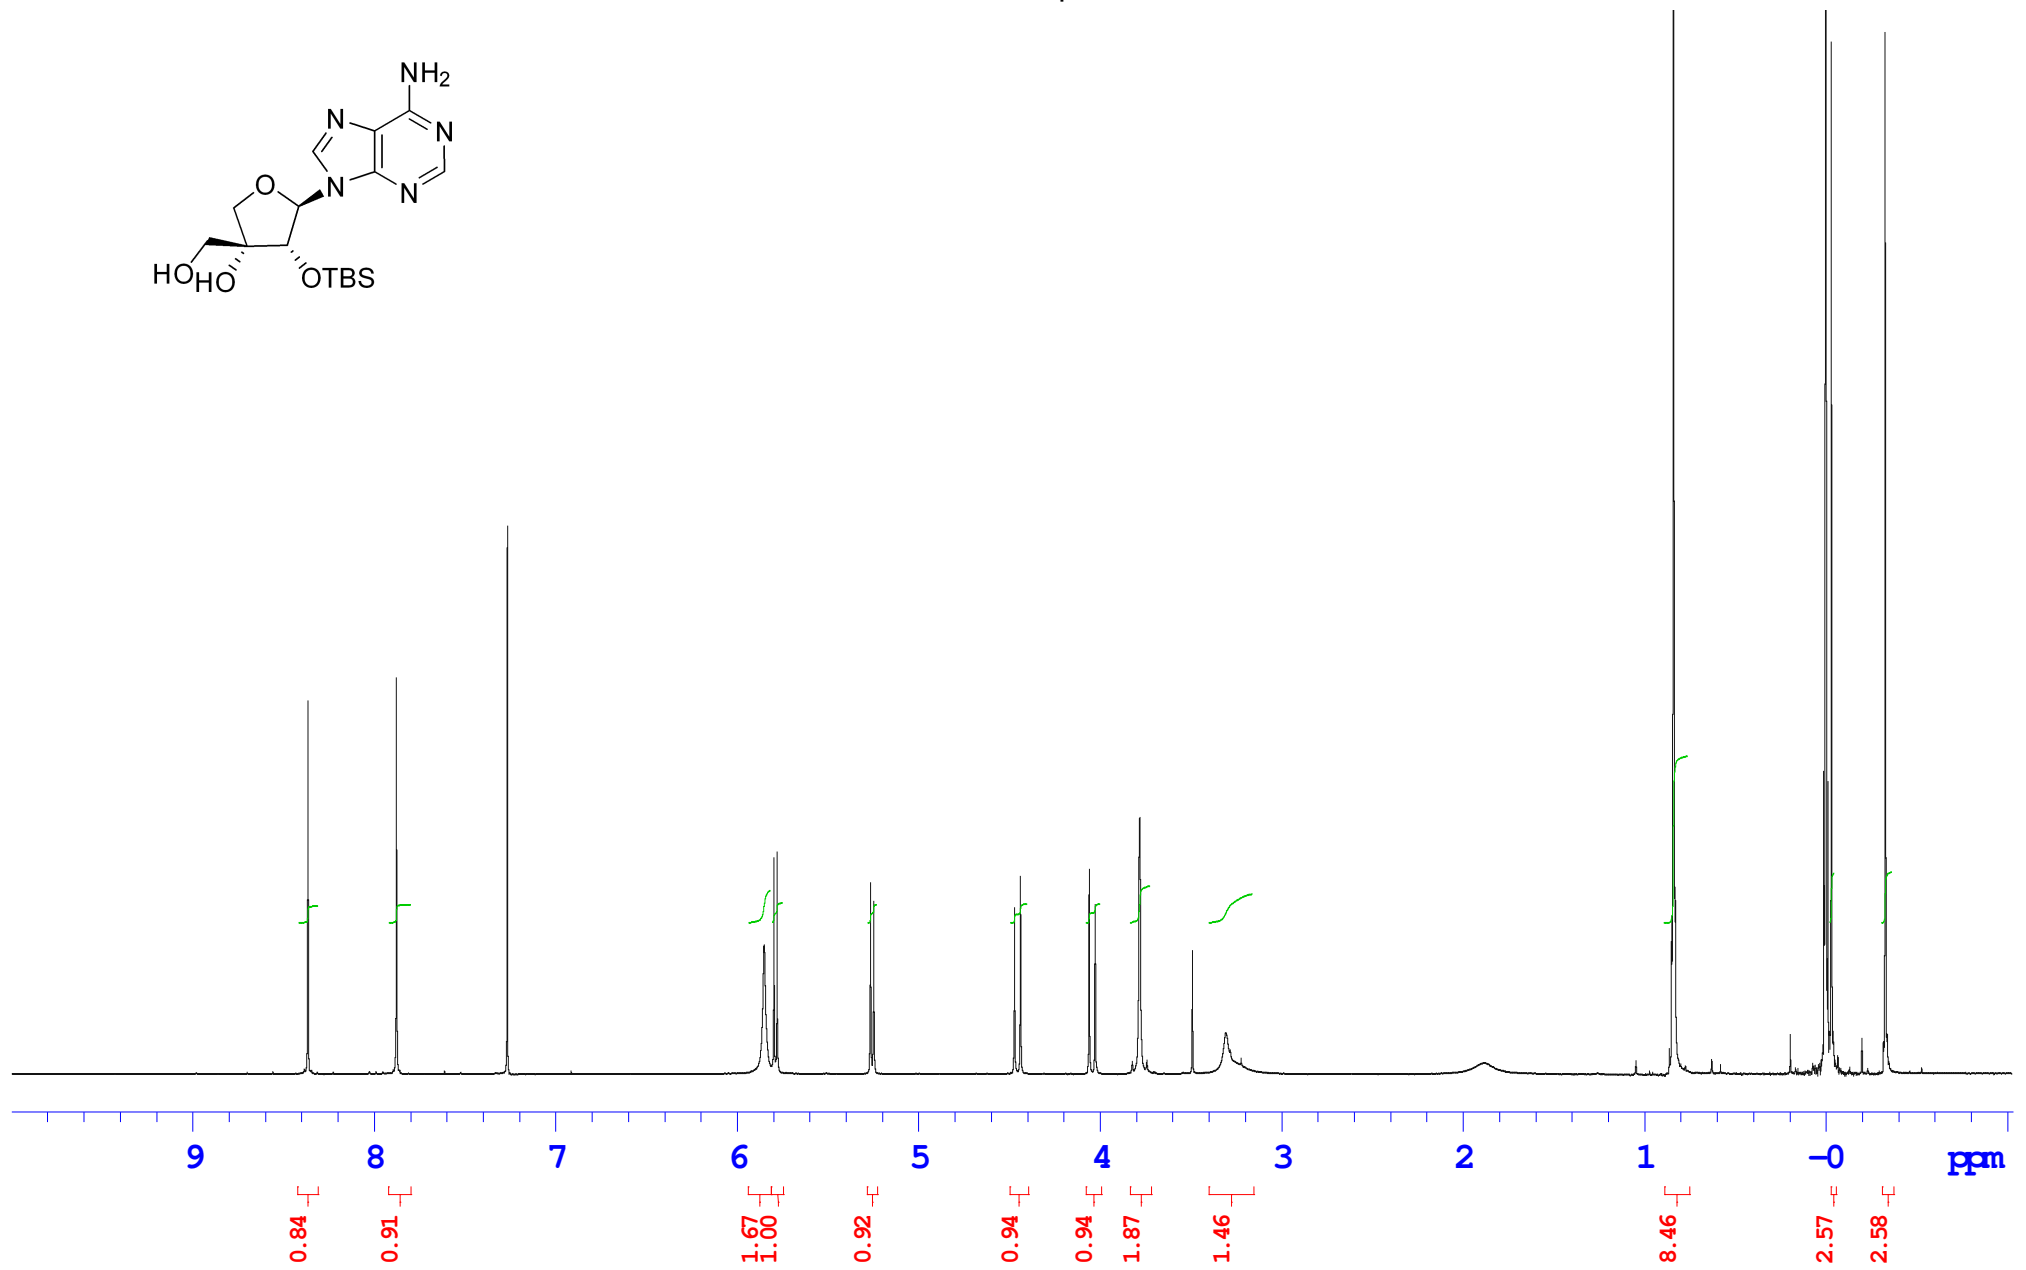

C NMR: Compound 30

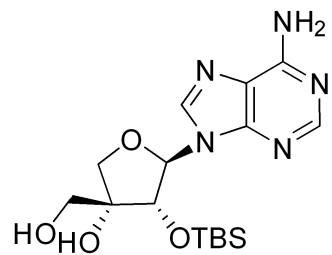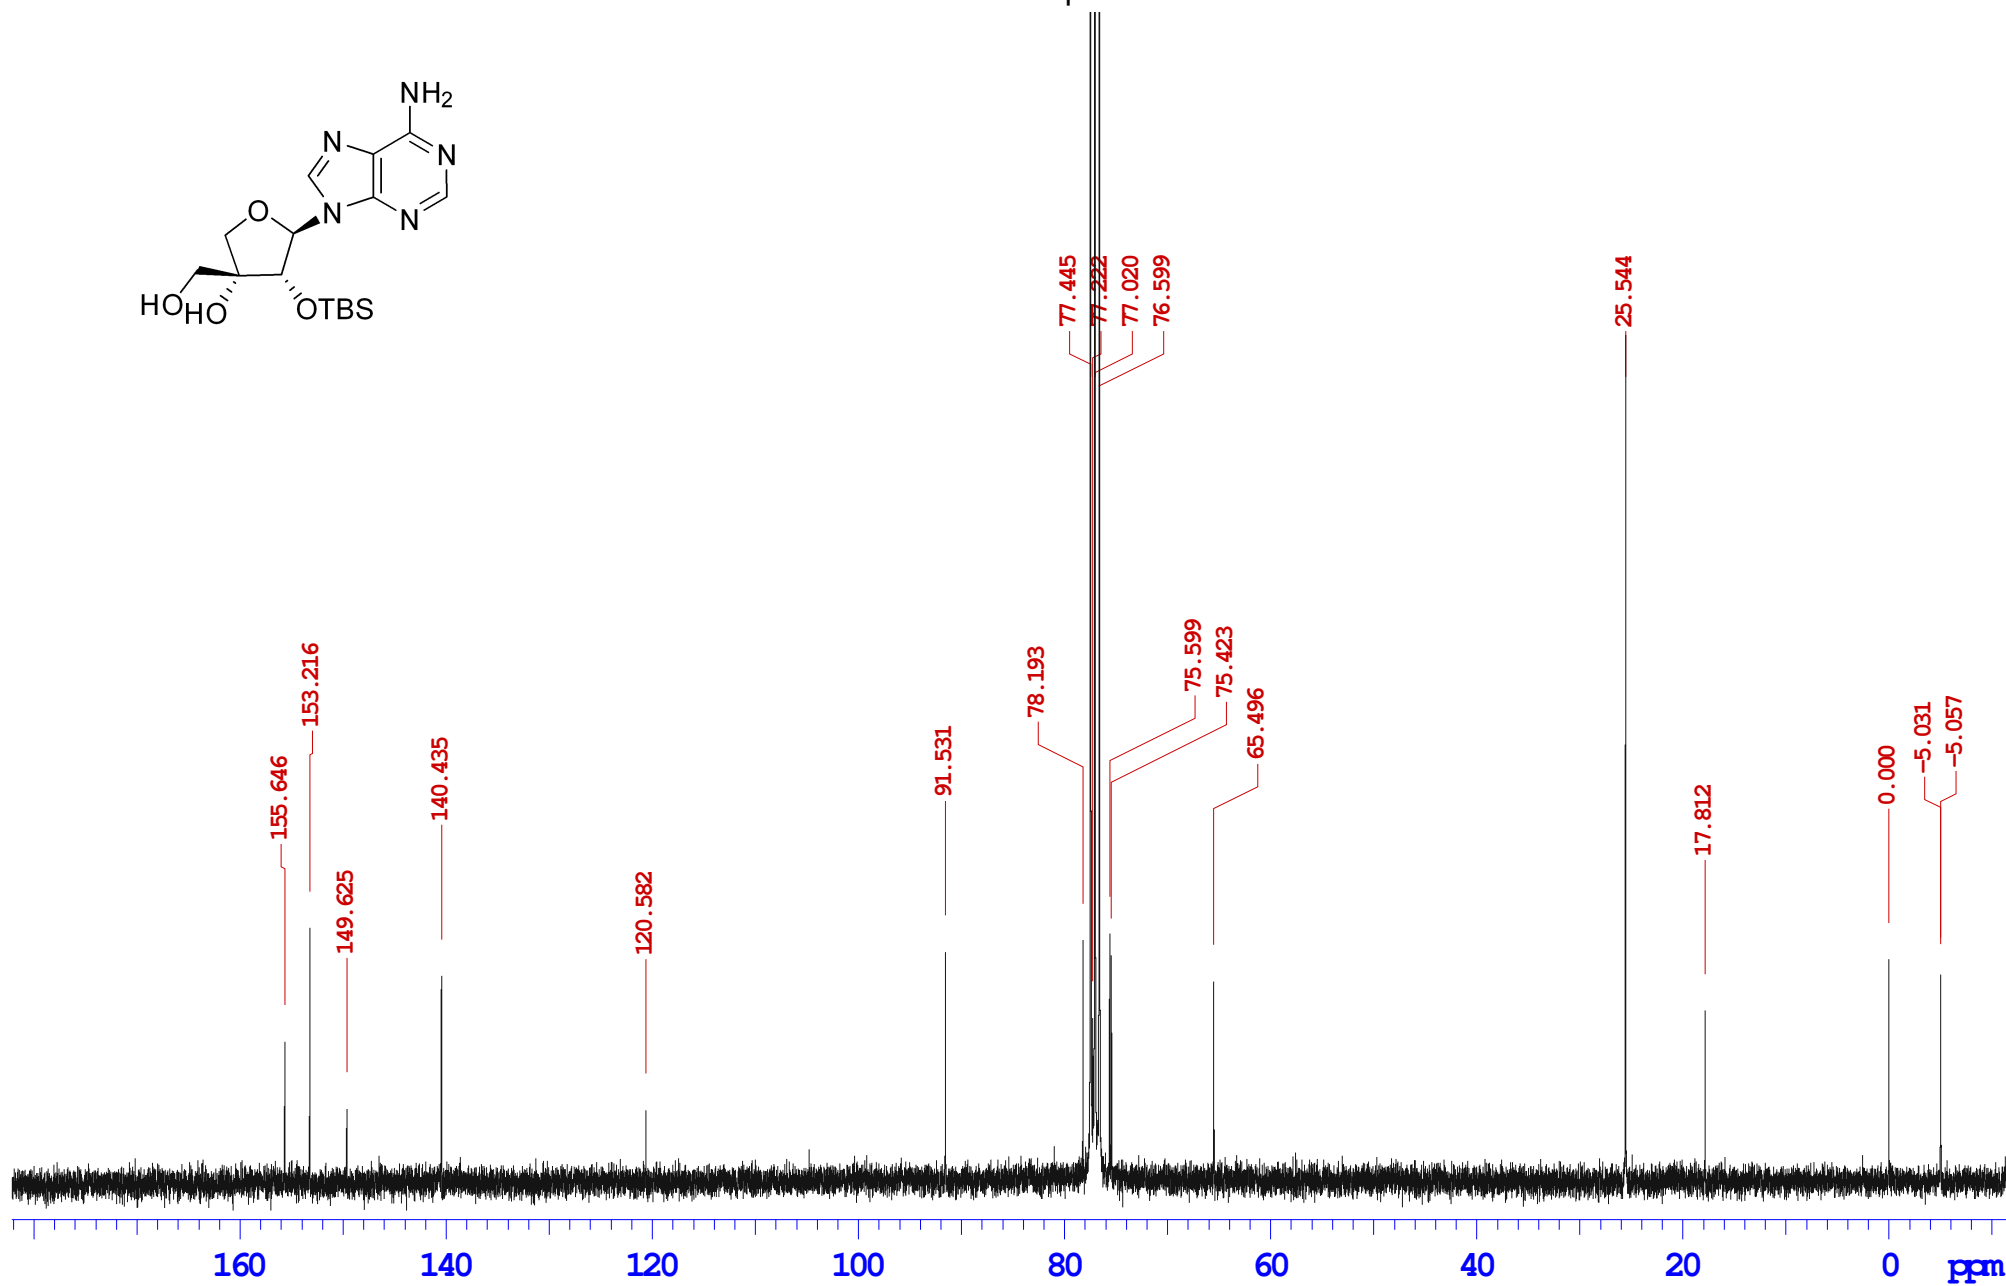

H NMR: Compound 31

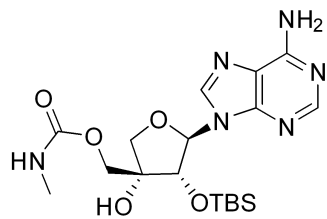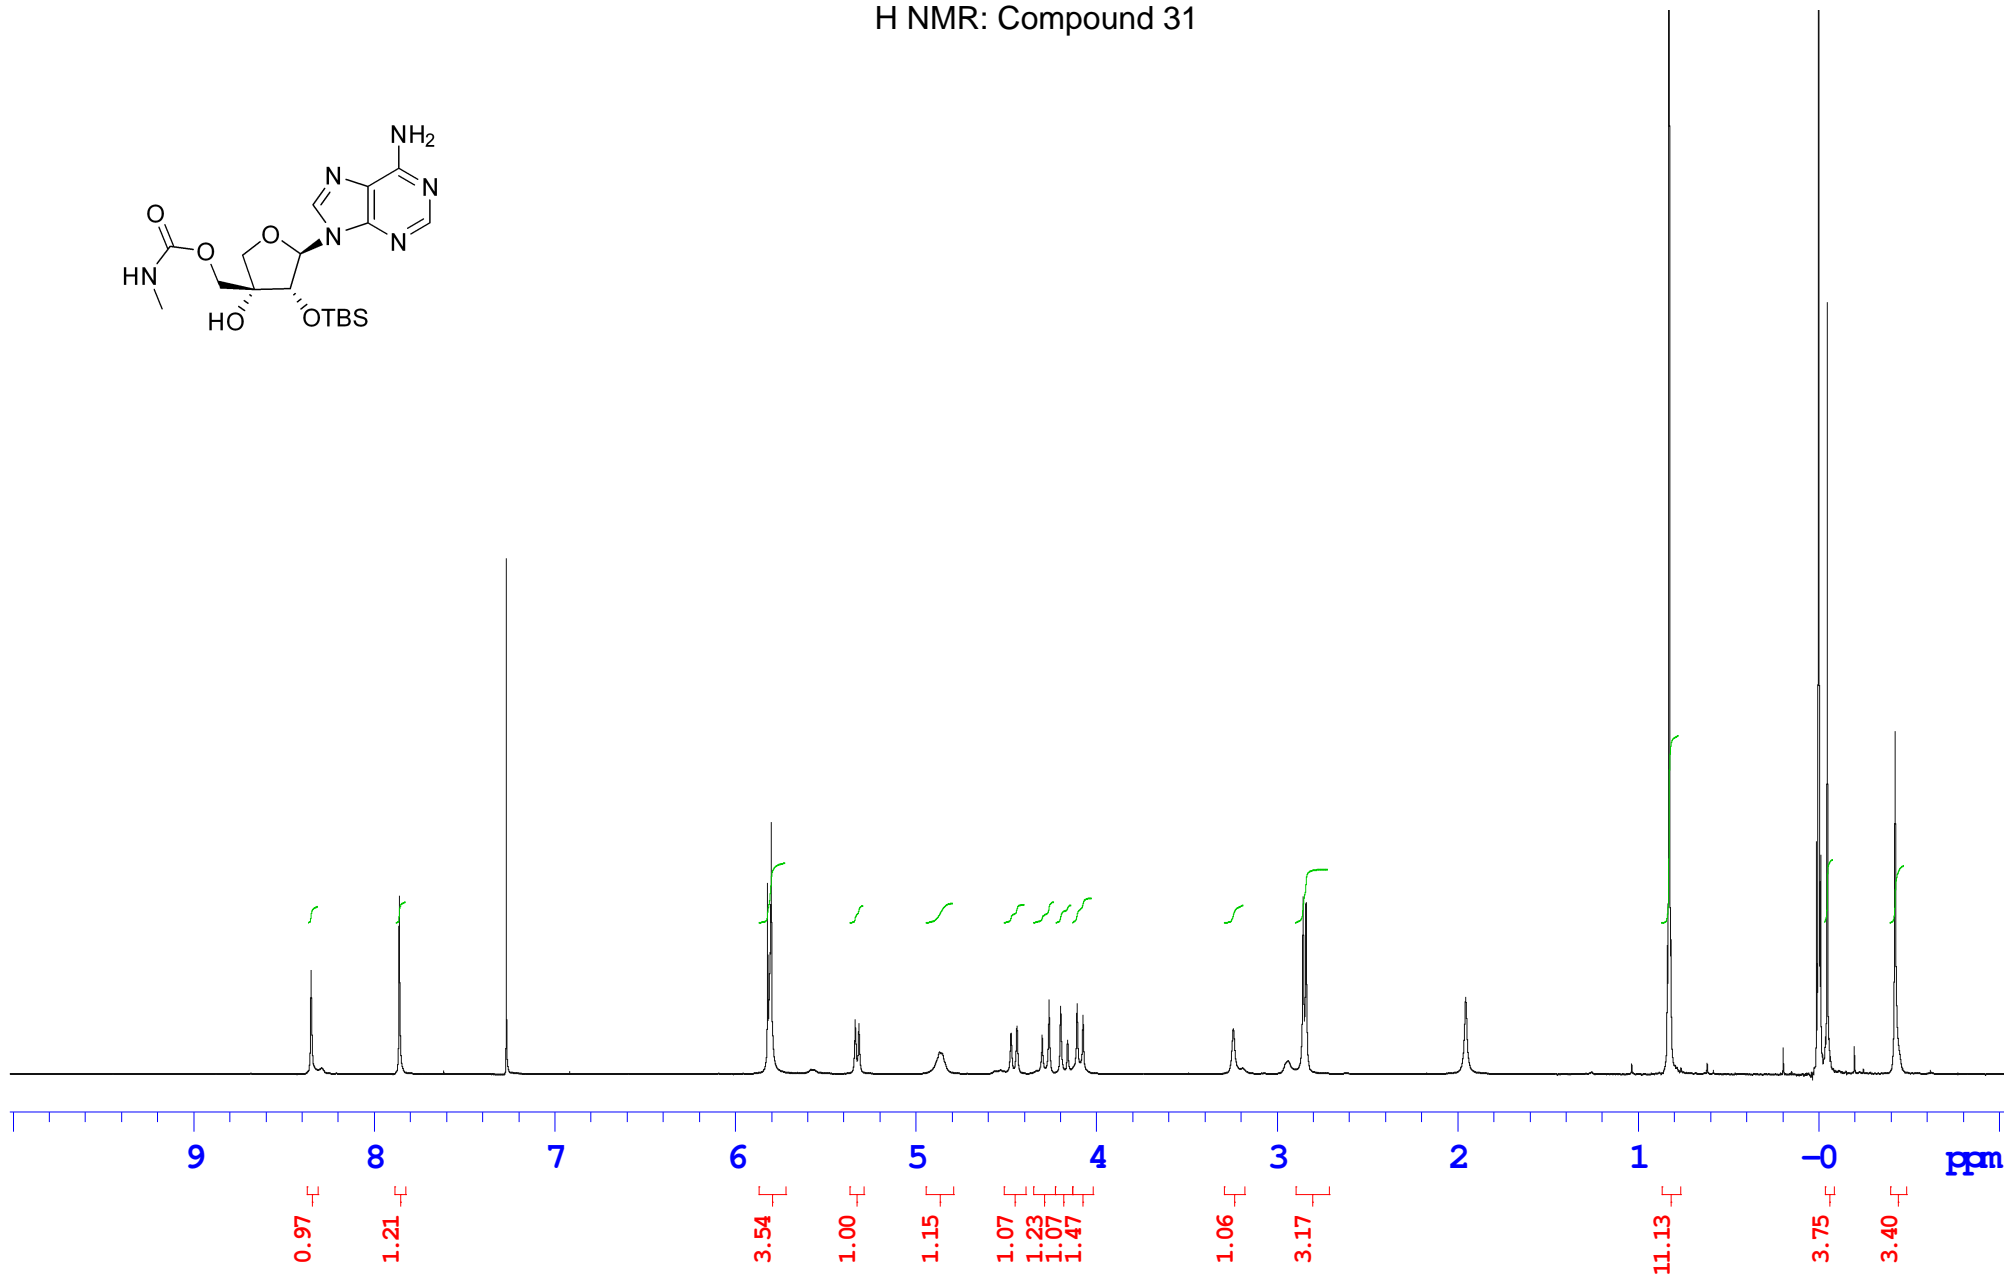



C NMR: Compound 31

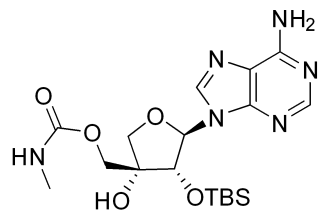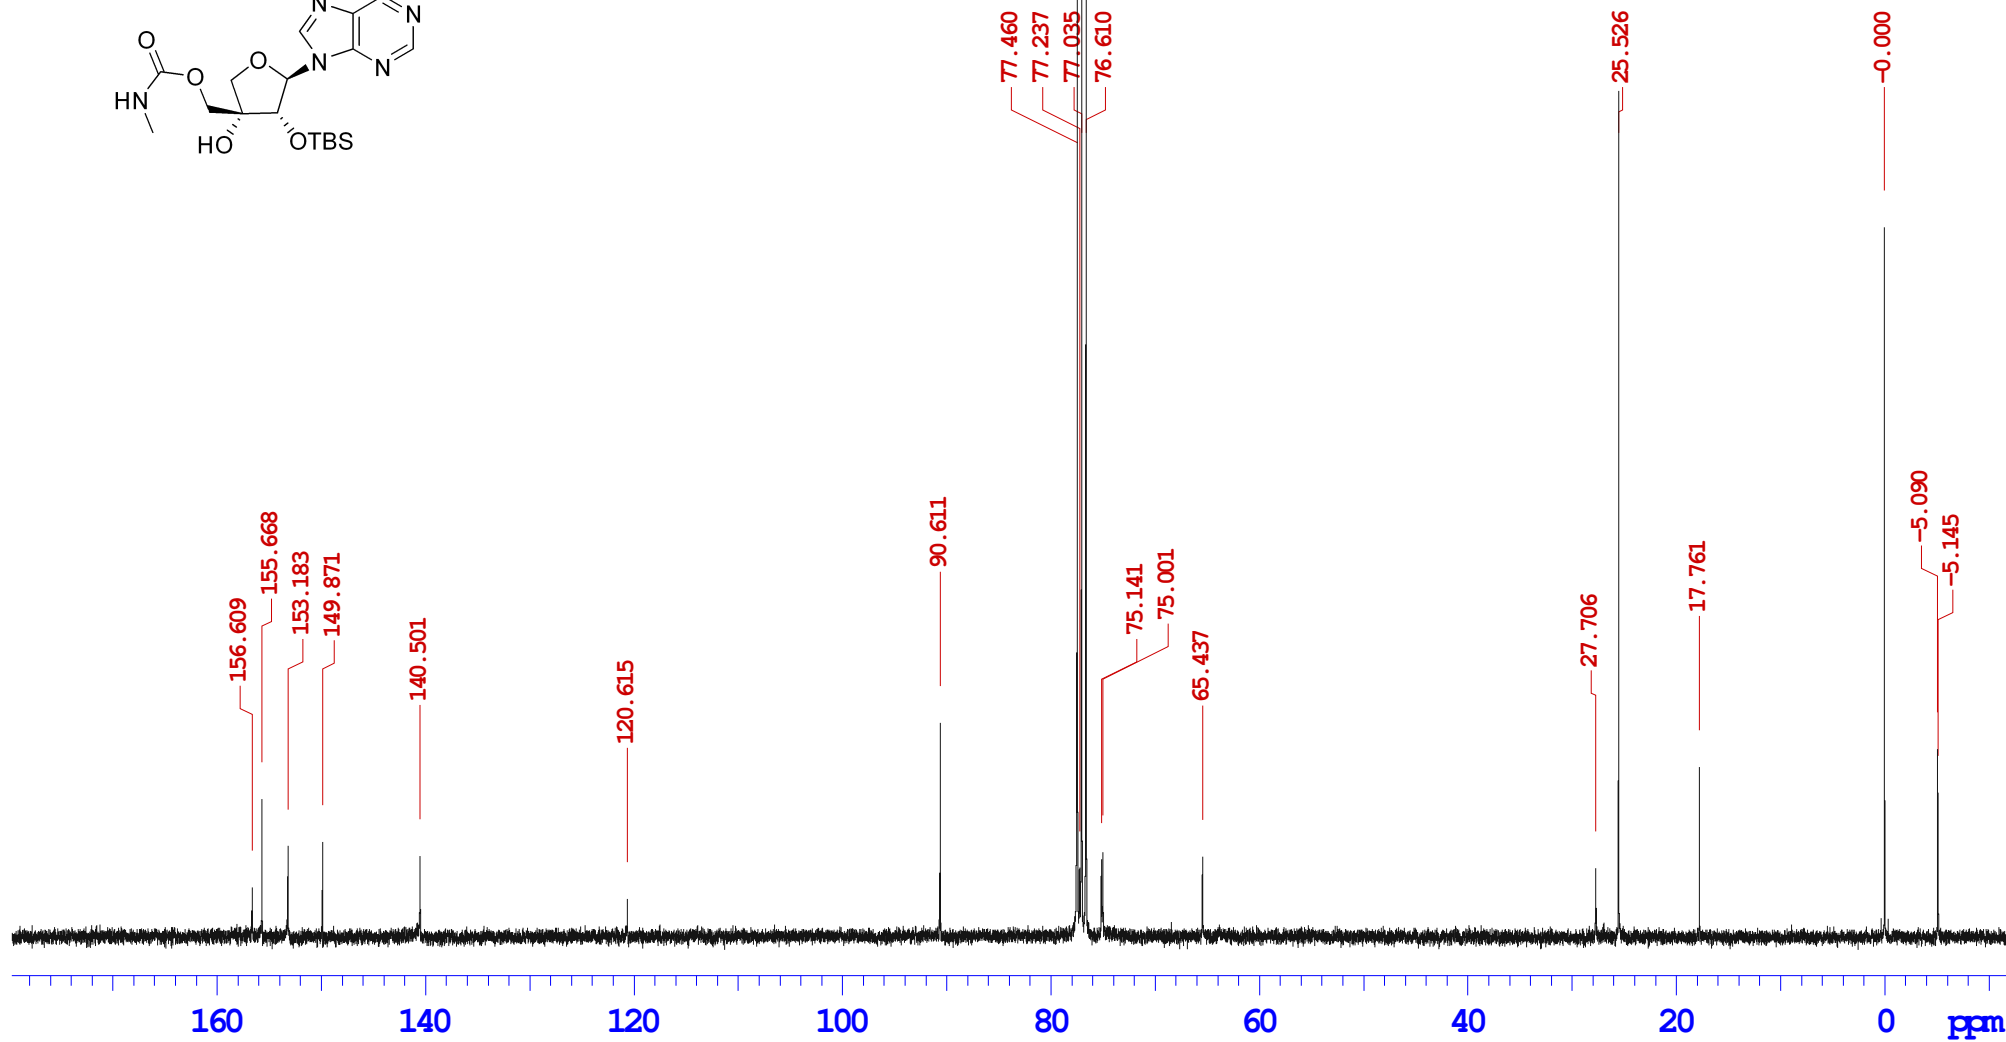

Supplement: NIHMS601182-supplement-01.pdf [file NIHMS601182-supplement-01.pdf]
